# Supplementary material
Source: publisher figshare collection journal article supplement (https://acs.figshare.com/ndownloader/files/5062195)
Supplement: Supplementary file 1 [file 5062195]

data_04288
 
_audit_creation_method            SHELXL-97
_chemical_name_systematic
;
 ?
;
_chemical_name_common             ?
_chemical_melting_point           ?
_chemical_formula_moiety          ?
_chemical_formula_sum
 'C36 H36 F3 P2 Pd'
_chemical_formula_weight          693.99
 
loop_
 _atom_type_symbol
 _atom_type_description
 _atom_type_scat_dispersion_real
 _atom_type_scat_dispersion_imag
 _atom_type_scat_source
 'C'  'C'   0.0033   0.0016
 'International Tables Vol C Tables 4.2.6.8 and 6.1.1.4'
 'H'  'H'   0.0000   0.0000
 'International Tables Vol C Tables 4.2.6.8 and 6.1.1.4'
 'F'  'F'   0.0171   0.0103
 'International Tables Vol C Tables 4.2.6.8 and 6.1.1.4'
 'P'  'P'   0.1023   0.0942
 'International Tables Vol C Tables 4.2.6.8 and 6.1.1.4'
 'Pd'  'Pd'  -0.9988   1.0072
 'International Tables Vol C Tables 4.2.6.8 and 6.1.1.4'
 
_symmetry_cell_setting            Monoclinic
_symmetry_space_group_name_H-M    P2(1)/n
 
loop_
 _symmetry_equiv_pos_as_xyz
 'x, y, z'
 '-x+1/2, y+1/2, -z+1/2'
 '-x, -y, -z'
 'x-1/2, -y-1/2, z-1/2'
 
_cell_length_a                    12.214(5)
_cell_length_b                    15.812(7)
_cell_length_c                    16.782(7)
_cell_angle_alpha                 90.00
_cell_angle_beta                  98.318(6)
_cell_angle_gamma                 90.00
_cell_volume                      3207(2)
_cell_formula_units_Z             4
_cell_measurement_temperature     293(2)
_cell_measurement_reflns_used     ?
_cell_measurement_theta_min       ?
_cell_measurement_theta_max       ?
 
_exptl_crystal_description        ireg.blok
_exptl_crystal_colour             colourless
_exptl_crystal_size_min           0.220
_exptl_crystal_size_mid           0.220
_exptl_crystal_size_max           0.340
_exptl_crystal_density_meas       ?
_exptl_crystal_density_diffrn     1.437
_exptl_crystal_density_method     'not measured'
_exptl_crystal_F_000              1420
_exptl_absorpt_coefficient_mu     0.720
_exptl_absorpt_correction_type    none
_exptl_absorpt_correction_T_min   ?
_exptl_absorpt_correction_T_max   ?
_exptl_absorpt_process_details    ?
 
_exptl_special_details
;
 ?
;
 
_diffrn_ambient_temperature       293(2)
_diffrn_radiation_wavelength      0.71073
_diffrn_radiation_type            MoK\a
_diffrn_radiation_source          'fine-focus sealed tube'
_diffrn_radiation_monochromator   graphite
_diffrn_measurement_device_type   'Bruker P4'
_diffrn_measurement_method        '\w scans'
_diffrn_detector_area_resol_mean  ?
_diffrn_standards_number          ?
_diffrn_standards_interval_count  ?
_diffrn_standards_interval_time   ?
_diffrn_standards_decay_%         ?
_diffrn_reflns_number             27962
_diffrn_reflns_av_R_equivalents   0.0322
_diffrn_reflns_av_sigmaI/netI     0.0309
_diffrn_reflns_limit_h_min        -16
_diffrn_reflns_limit_h_max        16
_diffrn_reflns_limit_k_min        -21
_diffrn_reflns_limit_k_max        19
_diffrn_reflns_limit_l_min        -22
_diffrn_reflns_limit_l_max        16
_diffrn_reflns_theta_min          1.78
_diffrn_reflns_theta_max          28.30
_reflns_number_total              7956
_reflns_number_gt                 6878
_reflns_threshold_expression      >2sigma(I)
 
_computing_data_collection        'Bruker XSCANS'
_computing_cell_refinement        'Bruker XSCANS'
_computing_data_reduction         'Bruker SHELXTL'
_computing_structure_solution     'SHELXS-97 (Sheldrick, 1990)'
_computing_structure_refinement   'SHELXL-97 (Sheldrick, 1997)'
_computing_molecular_graphics     'Bruker SHELXTL'
_computing_publication_material   'Bruker SHELXTL'
 
_refine_special_details
;
 Refinement of F^2^ against ALL reflections.  The weighted R-factor wR and
 goodness of fit S are based on F^2^, conventional R-factors R are based
 on F, with F set to zero for negative F^2^. The threshold expression of
 F^2^ > 2sigma(F^2^) is used only for calculating R-factors(gt) etc. and is
 not relevant to the choice of reflections for refinement.  R-factors based
 on F^2^ are statistically about twice as large as those based on F, and R-
 factors based on ALL data will be even larger.
;
 
_refine_ls_structure_factor_coef  Fsqd
_refine_ls_matrix_type            full
_refine_ls_weighting_scheme       calc
_refine_ls_weighting_details
 'calc w=1/[\s^2^(Fo^2^)+(0.0264P)^2^+0.5561P] where P=(Fo^2^+2Fc^2^)/3'
_atom_sites_solution_primary      direct
_atom_sites_solution_secondary    difmap
_atom_sites_solution_hydrogens    geom
_refine_ls_hydrogen_treatment     riding
_refine_ls_extinction_method      none
_refine_ls_extinction_coef        ?
_refine_ls_number_reflns          7956
_refine_ls_number_parameters      352
_refine_ls_number_restraints      0
_refine_ls_R_factor_all           0.0292
_refine_ls_R_factor_gt            0.0245
_refine_ls_wR_factor_ref          0.0609
_refine_ls_wR_factor_gt           0.0587
_refine_ls_goodness_of_fit_ref    1.075
_refine_ls_restrained_S_all       1.075
_refine_ls_shift/su_max           0.002
_refine_ls_shift/su_mean          0.000
 
loop_
 _atom_site_label
 _atom_site_type_symbol
 _atom_site_fract_x
 _atom_site_fract_y
 _atom_site_fract_z
 _atom_site_U_iso_or_equiv
 _atom_site_adp_type
 _atom_site_occupancy
 _atom_site_symmetry_multiplicity
 _atom_site_calc_flag
 _atom_site_refinement_flags
 _atom_site_disorder_assembly
 _atom_site_disorder_group
Pd1 Pd 0.919421(8) 0.337645(7) 0.223481(7) 0.01860(4) Uani 1 1 d . . .
P1 P 0.82050(3) 0.29368(3) 0.32564(2) 0.02037(8) Uani 1 1 d . . .
P2 P 0.94049(3) 0.19568(3) 0.20058(3) 0.02093(8) Uani 1 1 d . . .
F1 F 1.00197(10) 0.51217(7) 0.24153(9) 0.0556(4) Uani 1 1 d . . .
F2 F 0.83915(12) 0.50536(7) 0.17468(7) 0.0531(3) Uani 1 1 d . . .
F3 F 0.86208(9) 0.49610(6) 0.30282(6) 0.0353(2) Uani 1 1 d . . .
C1 C 0.85153(13) 0.18067(10) 0.34092(10) 0.0258(3) Uani 1 1 d . . .
H1A H 0.9240 0.1739 0.3726 0.031 Uiso 1 1 calc R . .
H1B H 0.7973 0.1549 0.3702 0.031 Uiso 1 1 calc R . .
C2 C 0.84928(13) 0.13691(11) 0.25954(10) 0.0265(3) Uani 1 1 d . . .
H2A H 0.7743 0.1360 0.2310 0.032 Uiso 1 1 calc R . .
H2B H 0.8748 0.0790 0.2674 0.032 Uiso 1 1 calc R . .
C3 C 0.90640(13) 0.46708(10) 0.23680(10) 0.0261(3) Uani 1 1 d . . .
C4 C 1.01312(12) 0.36334(10) 0.13402(10) 0.0228(3) Uani 1 1 d . . .
C5 C 0.96675(15) 0.38287(13) 0.05596(11) 0.0384(4) Uani 1 1 d . . .
H5A H 0.8901 0.3852 0.0431 0.046 Uiso 1 1 calc R . .
C6 C 1.03223(16) 0.39910(15) -0.00378(12) 0.0450(5) Uani 1 1 d . . .
H6A H 0.9990 0.4116 -0.0558 0.054 Uiso 1 1 calc R . .
C7 C 1.14554(16) 0.39671(12) 0.01373(12) 0.0375(4) Uani 1 1 d . . .
H7A H 1.1892 0.4079 -0.0261 0.045 Uiso 1 1 calc R . .
C8 C 1.19366(14) 0.37757(13) 0.09077(12) 0.0363(4) Uani 1 1 d . . .
H8A H 1.2703 0.3757 0.1033 0.044 Uiso 1 1 calc R . .
C9 C 1.12767(13) 0.36101(12) 0.15013(11) 0.0298(4) Uani 1 1 d . . .
H9A H 1.1614 0.3480 0.2020 0.036 Uiso 1 1 calc R . .
C10 C 0.84926(13) 0.33328(10) 0.42838(10) 0.0246(3) Uani 1 1 d . . .
C11 C 0.94825(15) 0.37543(12) 0.45310(11) 0.0353(4) Uani 1 1 d . . .
H11A H 0.9957 0.3878 0.4161 0.042 Uiso 1 1 calc R . .
C12 C 0.97614(17) 0.39896(13) 0.53316(12) 0.0451(5) Uani 1 1 d . . .
H12A H 1.0425 0.4269 0.5497 0.054 Uiso 1 1 calc R . .
C13 C 0.90635(18) 0.38120(13) 0.58798(12) 0.0441(5) Uani 1 1 d . . .
H13A H 0.9253 0.3978 0.6414 0.053 Uiso 1 1 calc R . .
C14 C 0.80841(19) 0.33900(14) 0.56454(12) 0.0461(5) Uani 1 1 d . . .
H14A H 0.7616 0.3266 0.6020 0.055 Uiso 1 1 calc R . .
C15 C 0.77990(16) 0.31511(13) 0.48453(11) 0.0372(4) Uani 1 1 d . . .
H15A H 0.7137 0.2867 0.4686 0.045 Uiso 1 1 calc R . .
C16 C 0.67087(12) 0.29867(11) 0.29859(9) 0.0234(3) Uani 1 1 d . . .
C17 C 0.62436(14) 0.37544(12) 0.27146(12) 0.0352(4) Uani 1 1 d . . .
H17A H 0.6693 0.4226 0.2696 0.042 Uiso 1 1 calc R . .
C18 C 0.51107(15) 0.38213(14) 0.24715(13) 0.0444(5) Uani 1 1 d . . .
H18A H 0.4805 0.4338 0.2293 0.053 Uiso 1 1 calc R . .
C19 C 0.44375(15) 0.31258(15) 0.24941(13) 0.0435(5) Uani 1 1 d . . .
H19A H 0.3679 0.3174 0.2332 0.052 Uiso 1 1 calc R . .
C20 C 0.48867(14) 0.23627(14) 0.27557(12) 0.0397(4) Uani 1 1 d . . .
H20A H 0.4431 0.1893 0.2769 0.048 Uiso 1 1 calc R . .
C21 C 0.60216(13) 0.22857(12) 0.30023(11) 0.0313(4) Uani 1 1 d . . .
H21A H 0.6321 0.1766 0.3178 0.038 Uiso 1 1 calc R . .
C22 C 0.91347(13) 0.15103(10) 0.09988(10) 0.0266(3) Uani 1 1 d . . .
C23 C 0.82465(17) 0.09729(15) 0.07715(13) 0.0502(6) Uani 1 1 d . . .
H23A H 0.7791 0.0814 0.1145 0.060 Uiso 1 1 calc R . .
C24 C 0.8036(2) 0.06710(18) -0.00162(15) 0.0661(8) Uani 1 1 d . . .
H24A H 0.7444 0.0307 -0.0167 0.079 Uiso 1 1 calc R . .
C25 C 0.87011(19) 0.09094(15) -0.05710(13) 0.0521(6) Uani 1 1 d . . .
H25A H 0.8543 0.0723 -0.1101 0.063 Uiso 1 1 calc R . .
C26 C 0.95996(18) 0.14229(14) -0.03444(13) 0.0456(5) Uani 1 1 d . . .
H26A H 1.0064 0.1567 -0.0716 0.055 Uiso 1 1 calc R . .
C27 C 0.98128(16) 0.17255(12) 0.04380(12) 0.0357(4) Uani 1 1 d . . .
H27A H 1.0418 0.2077 0.0587 0.043 Uiso 1 1 calc R . .
C28 C 1.07664(12) 0.15689(10) 0.24364(11) 0.0242(3) Uani 1 1 d . . .
C29 C 1.11972(14) 0.08256(11) 0.21709(12) 0.0343(4) Uani 1 1 d . . .
H29A H 1.0825 0.0546 0.1724 0.041 Uiso 1 1 calc R . .
C30 C 1.21789(15) 0.04969(13) 0.25680(13) 0.0420(5) Uani 1 1 d . . .
H30A H 1.2464 0.0000 0.2384 0.050 Uiso 1 1 calc R . .
C31 C 1.27317(15) 0.08978(13) 0.32281(13) 0.0412(5) Uani 1 1 d . . .
H31A H 1.3377 0.0664 0.3503 0.049 Uiso 1 1 calc R . .
C32 C 1.23283(15) 0.16541(13) 0.34879(13) 0.0422(5) Uani 1 1 d . . .
H32A H 1.2711 0.1934 0.3930 0.051 Uiso 1 1 calc R . .
C33 C 1.13531(14) 0.19919(12) 0.30866(11) 0.0334(4) Uani 1 1 d . . .
H33A H 1.1091 0.2505 0.3254 0.040 Uiso 1 1 calc R . .
 
loop_
 _atom_site_aniso_label
 _atom_site_aniso_U_11
 _atom_site_aniso_U_22
 _atom_site_aniso_U_33
 _atom_site_aniso_U_23
 _atom_site_aniso_U_13
 _atom_site_aniso_U_12
Pd1 0.01920(6) 0.01737(7) 0.01987(7) -0.00006(4) 0.00502(4) -0.00077(4)
P1 0.02029(17) 0.0207(2) 0.0209(2) 0.00010(15) 0.00564(15) -0.00069(14)
P2 0.02155(17) 0.0187(2) 0.0235(2) -0.00152(16) 0.00664(15) -0.00092(14)
F1 0.0498(7) 0.0365(7) 0.0877(10) -0.0275(6) 0.0340(7) -0.0211(5)
F2 0.0888(9) 0.0315(6) 0.0357(6) 0.0033(5) -0.0027(6) 0.0211(6)
F3 0.0488(6) 0.0255(5) 0.0355(6) -0.0043(4) 0.0188(5) 0.0048(4)
C1 0.0266(7) 0.0241(8) 0.0284(9) 0.0048(7) 0.0098(7) 0.0011(6)
C2 0.0275(7) 0.0208(8) 0.0330(9) -0.0013(7) 0.0108(7) -0.0024(6)
C3 0.0317(8) 0.0223(8) 0.0256(8) -0.0015(6) 0.0080(7) -0.0016(6)
C4 0.0260(7) 0.0186(7) 0.0249(8) -0.0005(6) 0.0078(6) -0.0010(6)
C5 0.0298(8) 0.0549(13) 0.0310(10) 0.0083(9) 0.0059(7) 0.0051(8)
C6 0.0465(11) 0.0659(15) 0.0237(9) 0.0118(9) 0.0084(8) 0.0092(10)
C7 0.0453(10) 0.0399(11) 0.0318(10) 0.0029(8) 0.0212(8) 0.0018(8)
C8 0.0273(8) 0.0457(11) 0.0385(11) 0.0013(9) 0.0130(7) -0.0035(7)
C9 0.0288(8) 0.0370(10) 0.0241(9) 0.0000(7) 0.0053(7) -0.0053(7)
C10 0.0284(8) 0.0231(8) 0.0222(8) 0.0008(6) 0.0031(6) 0.0001(6)
C11 0.0352(9) 0.0393(11) 0.0305(10) 0.0008(8) 0.0012(7) -0.0086(8)
C12 0.0500(11) 0.0453(12) 0.0353(11) 0.0000(9) -0.0098(9) -0.0128(9)
C13 0.0669(13) 0.0403(12) 0.0219(9) -0.0030(8) -0.0040(9) -0.0042(10)
C14 0.0600(13) 0.0559(14) 0.0249(10) -0.0042(9) 0.0142(9) -0.0064(10)
C15 0.0376(9) 0.0462(11) 0.0289(10) -0.0060(8) 0.0089(8) -0.0084(8)
C16 0.0221(7) 0.0286(9) 0.0205(8) -0.0029(6) 0.0065(6) -0.0003(6)
C17 0.0303(8) 0.0323(10) 0.0429(11) 0.0028(8) 0.0053(8) 0.0029(7)
C18 0.0334(9) 0.0496(13) 0.0492(13) 0.0063(10) 0.0023(9) 0.0129(9)
C19 0.0235(8) 0.0692(15) 0.0369(11) -0.0060(10) 0.0008(8) 0.0024(9)
C20 0.0271(8) 0.0506(12) 0.0424(11) -0.0093(9) 0.0082(8) -0.0098(8)
C21 0.0273(8) 0.0320(10) 0.0356(10) -0.0021(7) 0.0083(7) -0.0028(7)
C22 0.0295(8) 0.0230(8) 0.0276(9) -0.0042(6) 0.0055(7) 0.0015(6)
C23 0.0497(11) 0.0608(15) 0.0435(12) -0.0205(10) 0.0181(10) -0.0254(10)
C24 0.0607(14) 0.0825(19) 0.0569(15) -0.0384(14) 0.0145(12) -0.0335(13)
C25 0.0599(13) 0.0599(15) 0.0362(12) -0.0239(10) 0.0054(10) -0.0044(11)
C26 0.0565(12) 0.0518(13) 0.0310(10) -0.0099(9) 0.0153(9) -0.0042(10)
C27 0.0374(9) 0.0404(11) 0.0307(10) -0.0063(8) 0.0094(8) -0.0072(8)
C28 0.0222(7) 0.0241(8) 0.0273(8) 0.0029(6) 0.0071(6) -0.0003(6)
C29 0.0344(9) 0.0290(9) 0.0392(10) -0.0036(8) 0.0040(8) 0.0049(7)
C30 0.0364(9) 0.0337(11) 0.0551(13) 0.0004(9) 0.0039(9) 0.0111(8)
C31 0.0271(8) 0.0444(12) 0.0506(12) 0.0107(9) 0.0009(8) 0.0045(8)
C32 0.0303(9) 0.0537(13) 0.0402(12) -0.0029(9) -0.0029(8) -0.0036(8)
C33 0.0295(8) 0.0340(10) 0.0370(10) -0.0036(8) 0.0059(7) 0.0003(7)
 
_geom_special_details
;
 All esds (except the esd in the dihedral angle between two l.s. planes)
 are estimated using the full covariance matrix.  The cell esds are taken
 into account individually in the estimation of esds in distances, angles
 and torsion angles; correlations between esds in cell parameters are only
 used when they are defined by crystal symmetry.  An approximate (isotropic)
 treatment of cell esds is used for estimating esds involving l.s. planes.
;
 
loop_
 _geom_bond_atom_site_label_1
 _geom_bond_atom_site_label_2
 _geom_bond_distance
 _geom_bond_site_symmetry_2
 _geom_bond_publ_flag
Pd1 C4 2.0557(17) . ?
Pd1 C3 2.0674(18) . ?
Pd1 P2 2.2980(10) . ?
Pd1 P1 2.3412(8) . ?
P1 C16 1.8199(17) . ?
P1 C10 1.8203(18) . ?
P1 C1 1.8369(18) . ?
P2 C22 1.8173(18) . ?
P2 C28 1.8210(17) . ?
P2 C2 1.8444(17) . ?
F1 C3 1.3602(19) . ?
F2 C3 1.371(2) . ?
F3 C3 1.380(2) . ?
C1 C2 1.528(2) . ?
C4 C5 1.385(2) . ?
C4 C9 1.386(2) . ?
C5 C6 1.394(3) . ?
C6 C7 1.373(3) . ?
C7 C8 1.374(3) . ?
C8 C9 1.394(2) . ?
C10 C15 1.385(3) . ?
C10 C11 1.390(2) . ?
C11 C12 1.388(3) . ?
C12 C13 1.371(3) . ?
C13 C14 1.376(3) . ?
C14 C15 1.390(3) . ?
C16 C17 1.389(2) . ?
C16 C21 1.393(2) . ?
C17 C18 1.389(3) . ?
C18 C19 1.377(3) . ?
C19 C20 1.371(3) . ?
C20 C21 1.393(2) . ?
C22 C27 1.383(3) . ?
C22 C23 1.387(2) . ?
C23 C24 1.394(3) . ?
C24 C25 1.374(3) . ?
C25 C26 1.374(3) . ?
C26 C27 1.386(3) . ?
C28 C29 1.387(2) . ?
C28 C33 1.388(2) . ?
C29 C30 1.386(2) . ?
C30 C31 1.367(3) . ?
C31 C32 1.387(3) . ?
C32 C33 1.388(3) . ?
 
loop_
 _geom_angle_atom_site_label_1
 _geom_angle_atom_site_label_2
 _geom_angle_atom_site_label_3
 _geom_angle
 _geom_angle_site_symmetry_1
 _geom_angle_site_symmetry_3
 _geom_angle_publ_flag
C4 Pd1 C3 86.73(6) . . ?
C4 Pd1 P2 89.04(5) . . ?
C3 Pd1 P2 175.75(5) . . ?
C4 Pd1 P1 173.86(4) . . ?
C3 Pd1 P1 99.14(5) . . ?
P2 Pd1 P1 85.10(2) . . ?
C16 P1 C10 105.70(7) . . ?
C16 P1 C1 104.86(8) . . ?
C10 P1 C1 101.23(8) . . ?
C16 P1 Pd1 114.24(6) . . ?
C10 P1 Pd1 122.83(6) . . ?
C1 P1 Pd1 105.85(6) . . ?
C22 P2 C28 105.70(8) . . ?
C22 P2 C2 105.10(8) . . ?
C28 P2 C2 101.84(8) . . ?
C22 P2 Pd1 121.69(6) . . ?
C28 P2 Pd1 112.37(5) . . ?
C2 P2 Pd1 108.15(6) . . ?
C2 C1 P1 109.82(12) . . ?
C1 C2 P2 108.49(11) . . ?
F1 C3 F2 103.15(15) . . ?
F1 C3 F3 102.23(13) . . ?
F2 C3 F3 101.67(13) . . ?
F1 C3 Pd1 116.51(11) . . ?
F2 C3 Pd1 113.69(11) . . ?
F3 C3 Pd1 117.46(11) . . ?
C5 C4 C9 116.96(15) . . ?
C5 C4 Pd1 122.70(12) . . ?
C9 C4 Pd1 120.34(12) . . ?
C4 C5 C6 121.52(16) . . ?
C7 C6 C5 120.44(18) . . ?
C6 C7 C8 119.20(17) . . ?
C7 C8 C9 120.06(17) . . ?
C4 C9 C8 121.82(16) . . ?
C15 C10 C11 119.17(16) . . ?
C15 C10 P1 121.32(13) . . ?
C11 C10 P1 119.20(13) . . ?
C12 C11 C10 119.89(18) . . ?
C13 C12 C11 120.36(18) . . ?
C12 C13 C14 120.43(18) . . ?
C13 C14 C15 119.6(2) . . ?
C10 C15 C14 120.55(18) . . ?
C17 C16 C21 118.88(15) . . ?
C17 C16 P1 117.91(13) . . ?
C21 C16 P1 123.14(13) . . ?
C16 C17 C18 120.38(18) . . ?
C19 C18 C17 120.31(19) . . ?
C20 C19 C18 119.91(17) . . ?
C19 C20 C21 120.46(18) . . ?
C16 C21 C20 120.05(17) . . ?
C27 C22 C23 119.02(17) . . ?
C27 C22 P2 119.41(13) . . ?
C23 C22 P2 121.55(14) . . ?
C22 C23 C24 120.0(2) . . ?
C25 C24 C23 120.2(2) . . ?
C26 C25 C24 120.09(19) . . ?
C25 C26 C27 120.0(2) . . ?
C22 C27 C26 120.70(18) . . ?
C29 C28 C33 118.97(16) . . ?
C29 C28 P2 121.66(13) . . ?
C33 C28 P2 119.19(13) . . ?
C30 C29 C28 120.34(17) . . ?
C31 C30 C29 120.48(19) . . ?
C30 C31 C32 119.88(17) . . ?
C33 C32 C31 119.89(18) . . ?
C32 C33 C28 120.35(18) . . ?
 
loop_
 _geom_torsion_atom_site_label_1
 _geom_torsion_atom_site_label_2
 _geom_torsion_atom_site_label_3
 _geom_torsion_atom_site_label_4
 _geom_torsion
 _geom_torsion_site_symmetry_1
 _geom_torsion_site_symmetry_2
 _geom_torsion_site_symmetry_3
 _geom_torsion_site_symmetry_4
 _geom_torsion_publ_flag
C4 Pd1 P1 C16 -118.3(4) . . . . ?
C3 Pd1 P1 C16 79.03(8) . . . . ?
P2 Pd1 P1 C16 -100.68(6) . . . . ?
C4 Pd1 P1 C10 111.7(4) . . . . ?
C3 Pd1 P1 C10 -51.03(8) . . . . ?
P2 Pd1 P1 C10 129.26(6) . . . . ?
C4 Pd1 P1 C1 -3.4(4) . . . . ?
C3 Pd1 P1 C1 -166.12(7) . . . . ?
P2 Pd1 P1 C1 14.17(6) . . . . ?
C4 Pd1 P2 C22 -49.88(8) . . . . ?
C3 Pd1 P2 C22 -44.2(6) . . . . ?
P1 Pd1 P2 C22 131.98(7) . . . . ?
C4 Pd1 P2 C28 76.86(8) . . . . ?
C3 Pd1 P2 C28 82.6(6) . . . . ?
P1 Pd1 P2 C28 -101.29(7) . . . . ?
C4 Pd1 P2 C2 -171.53(7) . . . . ?
C3 Pd1 P2 C2 -165.8(6) . . . . ?
P1 Pd1 P2 C2 10.33(6) . . . . ?
C16 P1 C1 C2 78.72(12) . . . . ?
C10 P1 C1 C2 -171.52(11) . . . . ?
Pd1 P1 C1 C2 -42.40(11) . . . . ?
P1 C1 C2 P2 52.42(13) . . . . ?
C22 P2 C2 C1 -170.15(11) . . . . ?
C28 P2 C2 C1 79.79(12) . . . . ?
Pd1 P2 C2 C1 -38.76(12) . . . . ?
C4 Pd1 C3 F1 -47.87(13) . . . . ?
P2 Pd1 C3 F1 -53.6(7) . . . . ?
P1 Pd1 C3 F1 130.30(12) . . . . ?
C4 Pd1 C3 F2 71.90(13) . . . . ?
P2 Pd1 C3 F2 66.2(7) . . . . ?
P1 Pd1 C3 F2 -109.93(12) . . . . ?
C4 Pd1 C3 F3 -169.61(12) . . . . ?
P2 Pd1 C3 F3 -175.3(5) . . . . ?
P1 Pd1 C3 F3 8.56(12) . . . . ?
C3 Pd1 C4 C5 -82.13(16) . . . . ?
P2 Pd1 C4 C5 97.44(15) . . . . ?
P1 Pd1 C4 C5 115.0(4) . . . . ?
C3 Pd1 C4 C9 98.36(14) . . . . ?
P2 Pd1 C4 C9 -82.07(13) . . . . ?
P1 Pd1 C4 C9 -64.5(5) . . . . ?
C9 C4 C5 C6 0.3(3) . . . . ?
Pd1 C4 C5 C6 -179.26(16) . . . . ?
C4 C5 C6 C7 -0.5(3) . . . . ?
C5 C6 C7 C8 0.4(3) . . . . ?
C6 C7 C8 C9 -0.1(3) . . . . ?
C5 C4 C9 C8 0.1(3) . . . . ?
Pd1 C4 C9 C8 179.59(14) . . . . ?
C7 C8 C9 C4 -0.1(3) . . . . ?
C16 P1 C10 C15 37.46(17) . . . . ?
C1 P1 C10 C15 -71.65(16) . . . . ?
Pd1 P1 C10 C15 171.00(13) . . . . ?
C16 P1 C10 C11 -148.98(14) . . . . ?
C1 P1 C10 C11 101.91(15) . . . . ?
Pd1 P1 C10 C11 -15.45(16) . . . . ?
C15 C10 C11 C12 -0.2(3) . . . . ?
P1 C10 C11 C12 -173.93(15) . . . . ?
C10 C11 C12 C13 -0.3(3) . . . . ?
C11 C12 C13 C14 0.7(3) . . . . ?
C12 C13 C14 C15 -0.6(3) . . . . ?
C11 C10 C15 C14 0.3(3) . . . . ?
P1 C10 C15 C14 173.88(16) . . . . ?
C13 C14 C15 C10 0.1(3) . . . . ?
C10 P1 C16 C17 83.05(15) . . . . ?
C1 P1 C16 C17 -170.47(14) . . . . ?
Pd1 P1 C16 C17 -55.04(15) . . . . ?
C10 P1 C16 C21 -100.10(15) . . . . ?
C1 P1 C16 C21 6.38(16) . . . . ?
Pd1 P1 C16 C21 121.81(13) . . . . ?
C21 C16 C17 C18 0.6(3) . . . . ?
P1 C16 C17 C18 177.59(16) . . . . ?
C16 C17 C18 C19 -0.3(3) . . . . ?
C17 C18 C19 C20 -0.2(3) . . . . ?
C18 C19 C20 C21 0.2(3) . . . . ?
C17 C16 C21 C20 -0.5(3) . . . . ?
P1 C16 C21 C20 -177.36(14) . . . . ?
C19 C20 C21 C16 0.1(3) . . . . ?
C28 P2 C22 C27 -62.87(16) . . . . ?
C2 P2 C22 C27 -170.12(14) . . . . ?
Pd1 P2 C22 C27 66.79(15) . . . . ?
C28 P2 C22 C23 118.71(17) . . . . ?
C2 P2 C22 C23 11.45(18) . . . . ?
Pd1 P2 C22 C23 -111.63(17) . . . . ?
C27 C22 C23 C24 -1.2(3) . . . . ?
P2 C22 C23 C24 177.2(2) . . . . ?
C22 C23 C24 C25 -0.5(4) . . . . ?
C23 C24 C25 C26 2.3(4) . . . . ?
C24 C25 C26 C27 -2.3(4) . . . . ?
C23 C22 C27 C26 1.2(3) . . . . ?
P2 C22 C27 C26 -177.29(16) . . . . ?
C25 C26 C27 C22 0.6(3) . . . . ?
C22 P2 C28 C29 -24.82(17) . . . . ?
C2 P2 C28 C29 84.79(16) . . . . ?
Pd1 P2 C28 C29 -159.72(13) . . . . ?
C22 P2 C28 C33 160.11(14) . . . . ?
C2 P2 C28 C33 -90.29(15) . . . . ?
Pd1 P2 C28 C33 25.21(16) . . . . ?
C33 C28 C29 C30 2.2(3) . . . . ?
P2 C28 C29 C30 -172.84(15) . . . . ?
C28 C29 C30 C31 0.4(3) . . . . ?
C29 C30 C31 C32 -2.2(3) . . . . ?
C30 C31 C32 C33 1.3(3) . . . . ?
C31 C32 C33 C28 1.3(3) . . . . ?
C29 C28 C33 C32 -3.1(3) . . . . ?
P2 C28 C33 C32 172.15(15) . . . . ?
 
_diffrn_measured_fraction_theta_max    0.998
_diffrn_reflns_theta_full              28.30
_diffrn_measured_fraction_theta_full   0.998
_refine_diff_density_max    0.400
_refine_diff_density_min   -0.359
_refine_diff_density_rms    0.058
#===END

data_04301
 
_audit_creation_method            SHELXL-97
_chemical_name_systematic
;
 ?
;
_chemical_name_common             ?
_chemical_melting_point           ?
_chemical_formula_moiety          ?
_chemical_formula_sum
 'C30 H29 Cl1.50 F3 P2 Pd'
_chemical_formula_weight          668.05
 
loop_
 _atom_type_symbol
 _atom_type_description
 _atom_type_scat_dispersion_real
 _atom_type_scat_dispersion_imag
 _atom_type_scat_source
 'C'  'C'   0.0033   0.0016
 'International Tables Vol C Tables 4.2.6.8 and 6.1.1.4'
 'H'  'H'   0.0000   0.0000
 'International Tables Vol C Tables 4.2.6.8 and 6.1.1.4'
 'Cl'  'Cl'   0.1484   0.1585
 'International Tables Vol C Tables 4.2.6.8 and 6.1.1.4'
 'F'  'F'   0.0171   0.0103
 'International Tables Vol C Tables 4.2.6.8 and 6.1.1.4'
 'P'  'P'   0.1023   0.0942
 'International Tables Vol C Tables 4.2.6.8 and 6.1.1.4'
 'Pd'  'Pd'  -0.9988   1.0072
 'International Tables Vol C Tables 4.2.6.8 and 6.1.1.4'
 
_symmetry_cell_setting            Monoclinic
_symmetry_space_group_name_H-M    P2(1)/n
 
loop_
 _symmetry_equiv_pos_as_xyz
 'x, y, z'
 '-x+1/2, y+1/2, -z+1/2'
 '-x, -y, -z'
 'x-1/2, -y-1/2, z-1/2'
 
_cell_length_a                    9.215(2)
_cell_length_b                    26.278(7)
_cell_length_c                    12.097(3)
_cell_angle_alpha                 90.00
_cell_angle_beta                  101.897(4)
_cell_angle_gamma                 90.00
_cell_volume                      2866.3(13)
_cell_formula_units_Z             4
_cell_measurement_temperature     293(2)
_cell_measurement_reflns_used     ?
_cell_measurement_theta_min       ?
_cell_measurement_theta_max       ?
 
_exptl_crystal_description        ireg.blok
_exptl_crystal_colour             colourless
_exptl_crystal_size_min           0.130
_exptl_crystal_size_mid           0.180
_exptl_crystal_size_max           0.260
_exptl_crystal_density_meas       ?
_exptl_crystal_density_diffrn     1.548
_exptl_crystal_density_method     'not measured'
_exptl_crystal_F_000              1350
_exptl_absorpt_coefficient_mu     0.937
_exptl_absorpt_correction_type    none
_exptl_absorpt_correction_T_min   ?
_exptl_absorpt_correction_T_max   ?
_exptl_absorpt_process_details    ?
 
_exptl_special_details
;
 ?
;
 
_diffrn_ambient_temperature       293(2)
_diffrn_radiation_wavelength      0.71069
_diffrn_radiation_type            MoK\a
_diffrn_radiation_source          'fine-focus sealed tube'
_diffrn_radiation_monochromator   graphite
_diffrn_measurement_device_type   'Bruker P4'
_diffrn_measurement_method        '\w scans'
_diffrn_detector_area_resol_mean  ?
_diffrn_standards_number          ?
_diffrn_standards_interval_count  ?
_diffrn_standards_interval_time   ?
_diffrn_standards_decay_%         ?
_diffrn_reflns_number             26290
_diffrn_reflns_av_R_equivalents   0.0401
_diffrn_reflns_av_sigmaI/netI     0.0390
_diffrn_reflns_limit_h_min        -12
_diffrn_reflns_limit_h_max        11
_diffrn_reflns_limit_k_min        -34
_diffrn_reflns_limit_k_max        34
_diffrn_reflns_limit_l_min        -14
_diffrn_reflns_limit_l_max        16
_diffrn_reflns_theta_min          1.55
_diffrn_reflns_theta_max          28.33
_reflns_number_total              7102
_reflns_number_gt                 5821
_reflns_threshold_expression      >2sigma(I)
 
_computing_data_collection        'Bruker XSCANS'
_computing_cell_refinement        'Bruker XSCANS'
_computing_data_reduction         'Bruker SHELXTL'
_computing_structure_solution     'SHELXS-97 (Sheldrick, 1990)'
_computing_structure_refinement   'SHELXL-97 (Sheldrick, 1997)'
_computing_molecular_graphics     'Bruker SHELXTL'
_computing_publication_material   'Bruker SHELXTL'
 
_refine_special_details
;
 Refinement of F^2^ against ALL reflections.  The weighted R-factor wR and
 goodness of fit S are based on F^2^, conventional R-factors R are based
 on F, with F set to zero for negative F^2^. The threshold expression of
 F^2^ > 2sigma(F^2^) is used only for calculating R-factors(gt) etc. and is
 not relevant to the choice of reflections for refinement.  R-factors based
 on F^2^ are statistically about twice as large as those based on F, and R-
 factors based on ALL data will be even larger.
;
 
_refine_ls_structure_factor_coef  Fsqd
_refine_ls_matrix_type            full
_refine_ls_weighting_scheme       calc
_refine_ls_weighting_details
 'calc w=1/[\s^2^(Fo^2^)+(0.0437P)^2^+1.8171P] where P=(Fo^2^+2Fc^2^)/3'
_atom_sites_solution_primary      direct
_atom_sites_solution_secondary    difmap
_atom_sites_solution_hydrogens    geom
_refine_ls_hydrogen_treatment     riding
_refine_ls_extinction_method      none
_refine_ls_extinction_coef        ?
_refine_ls_number_reflns          7102
_refine_ls_number_parameters      361
_refine_ls_number_restraints      0
_refine_ls_R_factor_all           0.0465
_refine_ls_R_factor_gt            0.0354
_refine_ls_wR_factor_ref          0.0943
_refine_ls_wR_factor_gt           0.0865
_refine_ls_goodness_of_fit_ref    1.035
_refine_ls_restrained_S_all       1.035
_refine_ls_shift/su_max           0.001
_refine_ls_shift/su_mean          0.000
 
loop_
 _atom_site_label
 _atom_site_type_symbol
 _atom_site_fract_x
 _atom_site_fract_y
 _atom_site_fract_z
 _atom_site_U_iso_or_equiv
 _atom_site_adp_type
 _atom_site_occupancy
 _atom_site_symmetry_multiplicity
 _atom_site_calc_flag
 _atom_site_refinement_flags
 _atom_site_disorder_assembly
 _atom_site_disorder_group
Pd1 Pd 0.11343(2) 0.151482(7) 0.317822(16) 0.02357(7) Uani 1 1 d . . .
Cl1 Cl -0.06977(8) 0.16420(3) 0.15323(6) 0.03473(16) Uani 1 1 d . . .
P1 P 0.10068(7) 0.23470(2) 0.38526(5) 0.02331(14) Uani 1 1 d . . .
P2 P 0.30188(8) 0.14118(3) 0.46672(6) 0.02646(15) Uani 1 1 d . . .
F1 F 0.2219(2) 0.04486(7) 0.33286(19) 0.0603(6) Uani 1 1 d . . .
F2 F 0.1984(3) 0.07881(8) 0.1688(2) 0.0809(8) Uani 1 1 d . . .
F3 F 0.0098(2) 0.05349(7) 0.22973(19) 0.0585(6) Uani 1 1 d . . .
C1 C 0.2166(3) 0.23506(10) 0.5275(2) 0.0286(6) Uani 1 1 d . . .
H1A H 0.2428 0.2697 0.5510 0.034 Uiso 1 1 calc R . .
H1B H 0.1629 0.2201 0.5806 0.034 Uiso 1 1 calc R . .
C2 C 0.3567(3) 0.20416(10) 0.5256(2) 0.0324(6) Uani 1 1 d . . .
H2A H 0.4154 0.2008 0.6016 0.039 Uiso 1 1 calc R . .
H2B H 0.4164 0.2214 0.4797 0.039 Uiso 1 1 calc R . .
C3 C 0.1399(3) 0.07739(11) 0.2638(2) 0.0316(6) Uani 1 1 d . . .
C4 C 0.1889(3) 0.27957(10) 0.3046(2) 0.0270(5) Uani 1 1 d . . .
C5 C 0.2136(3) 0.26504(11) 0.1993(2) 0.0323(6) Uani 1 1 d . . .
H5A H 0.1894 0.2323 0.1726 0.039 Uiso 1 1 calc R . .
C6 C 0.2744(3) 0.29933(12) 0.1343(3) 0.0382(7) Uani 1 1 d . . .
H6A H 0.2893 0.2896 0.0636 0.046 Uiso 1 1 calc R . .
C7 C 0.3127(4) 0.34769(12) 0.1738(3) 0.0424(7) Uani 1 1 d . . .
H7A H 0.3542 0.3704 0.1302 0.051 Uiso 1 1 calc R . .
C8 C 0.2892(4) 0.36239(12) 0.2787(3) 0.0474(8) Uani 1 1 d . . .
H8A H 0.3144 0.3951 0.3053 0.057 Uiso 1 1 calc R . .
C9 C 0.2283(4) 0.32847(11) 0.3439(3) 0.0379(7) Uani 1 1 d . . .
H9A H 0.2135 0.3384 0.4146 0.046 Uiso 1 1 calc R . .
C10 C -0.0693(3) 0.26656(10) 0.4027(2) 0.0273(5) Uani 1 1 d . . .
C11 C -0.2030(3) 0.25472(11) 0.3311(2) 0.0338(6) Uani 1 1 d . . .
H11A H -0.2062 0.2305 0.2746 0.041 Uiso 1 1 calc R . .
C12 C -0.3331(4) 0.27938(13) 0.3444(3) 0.0446(8) Uani 1 1 d . . .
H12A H -0.4227 0.2716 0.2963 0.054 Uiso 1 1 calc R . .
C13 C -0.3291(4) 0.31505(13) 0.4283(3) 0.0484(8) Uani 1 1 d . . .
H13A H -0.4160 0.3310 0.4372 0.058 Uiso 1 1 calc R . .
C14 C -0.1968(4) 0.32706(13) 0.4989(3) 0.0475(8) Uani 1 1 d . . .
H14A H -0.1943 0.3513 0.5551 0.057 Uiso 1 1 calc R . .
C15 C -0.0665(4) 0.30313(11) 0.4866(3) 0.0388(7) Uani 1 1 d . . .
H15A H 0.0227 0.3115 0.5346 0.047 Uiso 1 1 calc R . .
C16 C 0.4709(3) 0.11436(11) 0.4366(3) 0.0334(6) Uani 1 1 d . . .
C17 C 0.5351(4) 0.13923(13) 0.3576(3) 0.0518(9) Uani 1 1 d . . .
H17A H 0.4926 0.1688 0.3233 0.062 Uiso 1 1 calc R . .
C18 C 0.6631(5) 0.11975(16) 0.3300(4) 0.0652(11) Uani 1 1 d . . .
H18A H 0.7071 0.1367 0.2780 0.078 Uiso 1 1 calc R . .
C19 C 0.7251(4) 0.07563(15) 0.3789(4) 0.0580(10) Uani 1 1 d . . .
H19A H 0.8093 0.0624 0.3584 0.070 Uiso 1 1 calc R . .
C20 C 0.6637(4) 0.05116(14) 0.4573(3) 0.0531(9) Uani 1 1 d . . .
H20A H 0.7069 0.0214 0.4907 0.064 Uiso 1 1 calc R . .
C21 C 0.5370(3) 0.07036(12) 0.4876(3) 0.0409(7) Uani 1 1 d . . .
H21A H 0.4963 0.0538 0.5420 0.049 Uiso 1 1 calc R . .
C22 C 0.2549(3) 0.10560(10) 0.5826(2) 0.0292(6) Uani 1 1 d . . .
C23 C 0.3487(4) 0.10597(12) 0.6889(2) 0.0408(7) Uani 1 1 d . . .
H23A H 0.4371 0.1242 0.7007 0.049 Uiso 1 1 calc R . .
C24 C 0.3098(5) 0.07905(13) 0.7773(3) 0.0514(9) Uani 1 1 d . . .
H24A H 0.3723 0.0792 0.8483 0.062 Uiso 1 1 calc R . .
C25 C 0.1788(5) 0.05207(13) 0.7600(3) 0.0525(9) Uani 1 1 d . . .
H25A H 0.1534 0.0341 0.8195 0.063 Uiso 1 1 calc R . .
C26 C 0.0851(4) 0.05152(12) 0.6553(3) 0.0443(8) Uani 1 1 d . . .
H26A H -0.0030 0.0331 0.6443 0.053 Uiso 1 1 calc R . .
C27 C 0.1224(3) 0.07846(11) 0.5661(3) 0.0348(6) Uani 1 1 d . . .
H27A H 0.0589 0.0783 0.4956 0.042 Uiso 1 1 calc R . .
C33 C 0.5590(6) -0.01888(18) -0.0721(4) 0.0733(13) Uani 1 1 d . . .
C34 C 0.5518(10) 0.0197(3) 0.0233(6) 0.055(2) Uani 0.50 1 d P . .
C36 C 0.560(2) 0.0528(4) 0.0835(9) 0.114(7) Uani 0.50 1 d P . .
C37 C 0.6759(11) 0.0147(3) -0.0609(9) 0.080(3) Uani 0.50 1 d P . .
Cl31 Cl 0.6938(3) 0.06422(12) 0.0490(3) 0.0668(6) Uani 0.50 1 d P . .
C32 C 0.672(2) 0.0469(4) 0.0163(15) 0.122(9) Uani 0.50 1 d P . .
 
loop_
 _atom_site_aniso_label
 _atom_site_aniso_U_11
 _atom_site_aniso_U_22
 _atom_site_aniso_U_33
 _atom_site_aniso_U_23
 _atom_site_aniso_U_13
 _atom_site_aniso_U_12
Pd1 0.02430(11) 0.02285(11) 0.02340(11) 0.00029(7) 0.00454(8) -0.00097(7)
Cl1 0.0388(4) 0.0354(3) 0.0270(3) -0.0009(3) 0.0000(3) 0.0014(3)
P1 0.0243(3) 0.0235(3) 0.0221(3) -0.0005(2) 0.0047(2) -0.0007(2)
P2 0.0211(3) 0.0271(3) 0.0303(4) 0.0017(3) 0.0032(3) 0.0003(2)
F1 0.0631(14) 0.0325(10) 0.0762(14) -0.0063(9) -0.0066(11) 0.0067(9)
F2 0.137(2) 0.0453(12) 0.0851(17) -0.0066(11) 0.0793(17) 0.0016(13)
F3 0.0539(13) 0.0346(10) 0.0797(15) -0.0071(9) -0.0028(11) -0.0075(9)
C1 0.0328(14) 0.0261(13) 0.0250(13) -0.0010(10) 0.0016(11) -0.0005(10)
C2 0.0289(14) 0.0303(14) 0.0357(15) 0.0004(11) 0.0010(11) -0.0031(11)
C3 0.0283(14) 0.0347(14) 0.0330(14) -0.0131(11) 0.0092(11) -0.0039(11)
C4 0.0235(13) 0.0289(13) 0.0287(13) 0.0025(10) 0.0054(10) 0.0005(10)
C5 0.0320(15) 0.0359(15) 0.0292(14) -0.0005(11) 0.0069(11) -0.0034(11)
C6 0.0349(16) 0.0491(18) 0.0325(15) 0.0067(12) 0.0111(12) 0.0001(13)
C7 0.0339(17) 0.0462(18) 0.0485(19) 0.0134(14) 0.0115(14) -0.0069(13)
C8 0.055(2) 0.0320(16) 0.057(2) 0.0009(14) 0.0155(17) -0.0120(14)
C9 0.0485(19) 0.0296(14) 0.0382(16) -0.0014(12) 0.0147(14) -0.0048(13)
C10 0.0269(13) 0.0307(13) 0.0265(13) 0.0029(10) 0.0107(10) 0.0006(10)
C11 0.0330(15) 0.0405(16) 0.0282(14) 0.0022(11) 0.0068(11) 0.0038(12)
C12 0.0302(16) 0.059(2) 0.0447(18) 0.0097(15) 0.0070(13) 0.0083(14)
C13 0.0416(19) 0.051(2) 0.059(2) 0.0133(16) 0.0263(16) 0.0174(15)
C14 0.053(2) 0.0420(18) 0.053(2) -0.0036(15) 0.0230(17) 0.0085(15)
C15 0.0386(17) 0.0354(15) 0.0440(17) -0.0065(12) 0.0124(13) 0.0007(12)
C16 0.0222(13) 0.0335(14) 0.0441(16) -0.0041(12) 0.0056(11) -0.0010(11)
C17 0.048(2) 0.0414(18) 0.074(3) 0.0023(16) 0.0310(18) 0.0014(15)
C18 0.059(2) 0.062(2) 0.090(3) -0.010(2) 0.049(2) -0.011(2)
C19 0.0301(17) 0.061(2) 0.086(3) -0.032(2) 0.0202(18) -0.0043(16)
C20 0.0329(17) 0.0464(19) 0.077(3) -0.0128(17) 0.0054(17) 0.0106(14)
C21 0.0295(16) 0.0387(16) 0.0539(19) -0.0006(13) 0.0075(14) 0.0042(12)
C22 0.0290(14) 0.0266(13) 0.0317(14) 0.0040(10) 0.0058(11) 0.0053(10)
C23 0.0431(18) 0.0401(17) 0.0350(16) 0.0043(12) -0.0014(13) 0.0065(13)
C24 0.072(3) 0.0462(19) 0.0318(16) 0.0066(13) -0.0001(16) 0.0123(18)
C25 0.072(3) 0.0428(19) 0.049(2) 0.0171(15) 0.0262(18) 0.0151(17)
C26 0.0427(18) 0.0405(17) 0.055(2) 0.0132(14) 0.0210(15) 0.0050(14)
C27 0.0312(15) 0.0344(15) 0.0393(16) 0.0084(12) 0.0082(12) 0.0041(11)
C33 0.089(4) 0.053(3) 0.072(3) 0.005(2) 0.003(3) 0.024(2)
C34 0.068(5) 0.045(4) 0.043(4) 0.014(3) -0.010(4) 0.018(4)
C36 0.199(17) 0.060(6) 0.051(6) -0.020(5) -0.051(8) 0.055(10)
C37 0.076(6) 0.043(4) 0.104(7) 0.007(5) -0.021(5) 0.003(4)
Cl31 0.0711(17) 0.0611(17) 0.0671(16) 0.0164(12) 0.0118(14) 0.0080(13)
C32 0.151(15) 0.032(6) 0.135(14) -0.010(6) -0.083(12) -0.017(7)
 
_geom_special_details
;
 All esds (except the esd in the dihedral angle between two l.s. planes)
 are estimated using the full covariance matrix.  The cell esds are taken
 into account individually in the estimation of esds in distances, angles
 and torsion angles; correlations between esds in cell parameters are only
 used when they are defined by crystal symmetry.  An approximate (isotropic)
 treatment of cell esds is used for estimating esds involving l.s. planes.
;
 
loop_
 _geom_bond_atom_site_label_1
 _geom_bond_atom_site_label_2
 _geom_bond_distance
 _geom_bond_site_symmetry_2
 _geom_bond_publ_flag
Pd1 C3 2.084(3) . ?
Pd1 P2 2.2458(8) . ?
Pd1 P1 2.3455(9) . ?
Pd1 Cl1 2.3537(8) . ?
P1 C4 1.825(3) . ?
P1 C10 1.826(3) . ?
P1 C1 1.829(3) . ?
P2 C22 1.811(3) . ?
P2 C16 1.814(3) . ?
P2 C2 1.831(3) . ?
F1 C3 1.319(3) . ?
F2 C3 1.367(3) . ?
F3 C3 1.341(3) . ?
C1 C2 1.530(4) . ?
C4 C9 1.392(4) . ?
C4 C5 1.392(4) . ?
C5 C6 1.388(4) . ?
C6 C7 1.378(4) . ?
C7 C8 1.386(5) . ?
C8 C9 1.384(4) . ?
C10 C11 1.387(4) . ?
C10 C15 1.395(4) . ?
C11 C12 1.401(4) . ?
C12 C13 1.377(5) . ?
C13 C14 1.373(5) . ?
C14 C15 1.390(4) . ?
C16 C17 1.387(5) . ?
C16 C21 1.390(4) . ?
C17 C18 1.389(5) . ?
C18 C19 1.371(6) . ?
C19 C20 1.362(6) . ?
C20 C21 1.390(4) . ?
C22 C27 1.393(4) . ?
C22 C23 1.394(4) . ?
C23 C24 1.389(5) . ?
C24 C25 1.378(5) . ?
C25 C26 1.378(5) . ?
C26 C27 1.391(4) . ?
C33 C34 1.281(10) 3_655 ?
C33 C37 1.377(11) . ?
C33 C36 1.395(19) 3_655 ?
C33 C34 1.547(10) . ?
C34 C36 1.128(12) . ?
C34 C33 1.281(10) 3_655 ?
C34 C32 1.33(2) . ?
C34 C34 1.441(17) 3_655 ?
C34 C37 1.685(15) . ?
C34 Cl31 1.735(9) . ?
C36 C33 1.395(19) 3_655 ?
C36 Cl31 1.42(2) . ?
C36 C32 1.45(3) . ?
C37 C32 1.266(18) . ?
C37 Cl31 1.843(11) . ?
Cl31 C32 0.611(10) . ?
 
loop_
 _geom_angle_atom_site_label_1
 _geom_angle_atom_site_label_2
 _geom_angle_atom_site_label_3
 _geom_angle
 _geom_angle_site_symmetry_1
 _geom_angle_site_symmetry_3
 _geom_angle_publ_flag
C3 Pd1 P2 91.01(8) . . ?
C3 Pd1 P1 176.06(8) . . ?
P2 Pd1 P1 85.37(3) . . ?
C3 Pd1 Cl1 88.71(8) . . ?
P2 Pd1 Cl1 175.36(3) . . ?
P1 Pd1 Cl1 94.77(3) . . ?
C4 P1 C10 104.65(12) . . ?
C4 P1 C1 105.17(12) . . ?
C10 P1 C1 103.74(12) . . ?
C4 P1 Pd1 110.89(9) . . ?
C10 P1 Pd1 124.97(9) . . ?
C1 P1 Pd1 105.70(9) . . ?
C22 P2 C16 107.88(13) . . ?
C22 P2 C2 104.85(13) . . ?
C16 P2 C2 104.46(13) . . ?
C22 P2 Pd1 114.50(9) . . ?
C16 P2 Pd1 116.11(10) . . ?
C2 P2 Pd1 107.99(9) . . ?
C2 C1 P1 108.32(18) . . ?
C1 C2 P2 108.62(18) . . ?
F1 C3 F3 104.5(2) . . ?
F1 C3 F2 106.0(2) . . ?
F3 C3 F2 103.7(2) . . ?
F1 C3 Pd1 119.75(18) . . ?
F3 C3 Pd1 112.28(19) . . ?
F2 C3 Pd1 109.26(19) . . ?
C9 C4 C5 119.0(3) . . ?
C9 C4 P1 121.8(2) . . ?
C5 C4 P1 119.1(2) . . ?
C6 C5 C4 120.1(3) . . ?
C7 C6 C5 120.4(3) . . ?
C6 C7 C8 119.8(3) . . ?
C7 C8 C9 120.1(3) . . ?
C8 C9 C4 120.5(3) . . ?
C11 C10 C15 119.3(3) . . ?
C11 C10 P1 119.9(2) . . ?
C15 C10 P1 120.8(2) . . ?
C10 C11 C12 119.7(3) . . ?
C13 C12 C11 120.4(3) . . ?
C14 C13 C12 120.0(3) . . ?
C13 C14 C15 120.4(3) . . ?
C14 C15 C10 120.2(3) . . ?
C17 C16 C21 119.2(3) . . ?
C17 C16 P2 117.5(2) . . ?
C21 C16 P2 123.4(2) . . ?
C16 C17 C18 119.8(3) . . ?
C19 C18 C17 120.4(4) . . ?
C20 C19 C18 120.3(3) . . ?
C19 C20 C21 120.3(3) . . ?
C20 C21 C16 120.0(3) . . ?
C27 C22 C23 119.6(3) . . ?
C27 C22 P2 119.7(2) . . ?
C23 C22 P2 120.6(2) . . ?
C24 C23 C22 119.8(3) . . ?
C25 C24 C23 120.1(3) . . ?
C24 C25 C26 120.6(3) . . ?
C25 C26 C27 119.9(3) . . ?
C26 C27 C22 119.9(3) . . ?
C34 C33 C37 130.3(7) 3_655 . ?
C34 C33 C36 49.6(7) 3_655 3_655 ?
C37 C33 C36 179.8(7) . 3_655 ?
C34 C33 C34 60.4(7) 3_655 . ?
C37 C33 C34 70.1(6) . . ?
C36 C33 C34 109.8(9) 3_655 . ?
C36 C34 C33 70.4(12) . 3_655 ?
C36 C34 C32 71.5(12) . . ?
C33 C34 C32 141.9(10) 3_655 . ?
C36 C34 C34 139.0(18) . 3_655 ?
C33 C34 C34 69.0(8) 3_655 3_655 ?
C32 C34 C34 148.4(14) . 3_655 ?
C36 C34 C33 168.6(14) . . ?
C33 C34 C33 119.6(7) 3_655 . ?
C32 C34 C33 98.1(11) . . ?
C34 C34 C33 50.6(5) 3_655 . ?
C36 C34 C37 119.3(14) . . ?
C33 C34 C37 169.0(7) 3_655 . ?
C32 C34 C37 47.9(9) . . ?
C34 C34 C37 100.7(9) 3_655 . ?
C33 C34 C37 50.2(5) . . ?
C36 C34 Cl31 54.4(12) . . ?
C33 C34 Cl31 124.9(6) 3_655 . ?
C32 C34 Cl31 17.3(8) . . ?
C34 C34 Cl31 165.6(11) 3_655 . ?
C33 C34 Cl31 115.4(7) . . ?
C37 C34 Cl31 65.2(5) . . ?
C34 C36 C33 59.9(9) . 3_655 ?
C34 C36 Cl31 85.2(13) . . ?
C33 C36 Cl31 145.1(9) 3_655 . ?
C34 C36 C32 60.8(10) . . ?
C33 C36 C32 120.7(9) 3_655 . ?
Cl31 C36 C32 24.6(5) . . ?
C32 C37 C33 110.9(13) . . ?
C32 C37 C34 51.3(10) . . ?
C33 C37 C34 59.7(6) . . ?
C32 C37 Cl31 7.5(10) . . ?
C33 C37 Cl31 118.4(8) . . ?
C34 C37 Cl31 58.7(5) . . ?
C32 Cl31 C36 81(2) . . ?
C32 Cl31 C34 41(2) . . ?
C36 Cl31 C34 40.4(5) . . ?
C32 Cl31 C37 16(2) . . ?
C36 Cl31 C37 96.3(6) . . ?
C34 Cl31 C37 56.1(5) . . ?
Cl31 C32 C37 157(3) . . ?
Cl31 C32 C34 122(3) . . ?
C37 C32 C34 80.8(8) . . ?
Cl31 C32 C36 75(2) . . ?
C37 C32 C36 128.4(14) . . ?
C34 C32 C36 47.7(10) . . ?
 
loop_
 _geom_torsion_atom_site_label_1
 _geom_torsion_atom_site_label_2
 _geom_torsion_atom_site_label_3
 _geom_torsion_atom_site_label_4
 _geom_torsion
 _geom_torsion_site_symmetry_1
 _geom_torsion_site_symmetry_2
 _geom_torsion_site_symmetry_3
 _geom_torsion_site_symmetry_4
 _geom_torsion_publ_flag
C3 Pd1 P1 C4 77.9(12) . . . . ?
P2 Pd1 P1 C4 101.11(9) . . . . ?
Cl1 Pd1 P1 C4 -74.24(9) . . . . ?
C3 Pd1 P1 C10 -155.4(12) . . . . ?
P2 Pd1 P1 C10 -132.21(10) . . . . ?
Cl1 Pd1 P1 C10 52.44(10) . . . . ?
C3 Pd1 P1 C1 -35.6(12) . . . . ?
P2 Pd1 P1 C1 -12.37(10) . . . . ?
Cl1 Pd1 P1 C1 172.28(10) . . . . ?
C3 Pd1 P2 C22 -78.26(13) . . . . ?
P1 Pd1 P2 C22 103.29(10) . . . . ?
Cl1 Pd1 P2 C22 -164.8(3) . . . . ?
C3 Pd1 P2 C16 48.53(13) . . . . ?
P1 Pd1 P2 C16 -129.92(11) . . . . ?
Cl1 Pd1 P2 C16 -38.0(3) . . . . ?
C3 Pd1 P2 C2 165.37(13) . . . . ?
P1 Pd1 P2 C2 -13.07(10) . . . . ?
Cl1 Pd1 P2 C2 78.9(3) . . . . ?
C4 P1 C1 C2 -76.2(2) . . . . ?
C10 P1 C1 C2 174.13(18) . . . . ?
Pd1 P1 C1 C2 41.16(19) . . . . ?
P1 C1 C2 P2 -53.8(2) . . . . ?
C22 P2 C2 C1 -80.2(2) . . . . ?
C16 P2 C2 C1 166.50(19) . . . . ?
Pd1 P2 C2 C1 42.3(2) . . . . ?
P2 Pd1 C3 F1 14.0(2) . . . . ?
P1 Pd1 C3 F1 37.2(13) . . . . ?
Cl1 Pd1 C3 F1 -170.6(2) . . . . ?
P2 Pd1 C3 F3 137.1(2) . . . . ?
P1 Pd1 C3 F3 160.3(10) . . . . ?
Cl1 Pd1 C3 F3 -47.5(2) . . . . ?
P2 Pd1 C3 F2 -108.4(2) . . . . ?
P1 Pd1 C3 F2 -85.3(12) . . . . ?
Cl1 Pd1 C3 F2 66.9(2) . . . . ?
C10 P1 C4 C9 58.7(3) . . . . ?
C1 P1 C4 C9 -50.2(3) . . . . ?
Pd1 P1 C4 C9 -164.0(2) . . . . ?
C10 P1 C4 C5 -119.3(2) . . . . ?
C1 P1 C4 C5 131.7(2) . . . . ?
Pd1 P1 C4 C5 17.9(2) . . . . ?
C9 C4 C5 C6 -1.1(4) . . . . ?
P1 C4 C5 C6 177.1(2) . . . . ?
C4 C5 C6 C7 0.9(4) . . . . ?
C5 C6 C7 C8 -0.6(5) . . . . ?
C6 C7 C8 C9 0.4(5) . . . . ?
C7 C8 C9 C4 -0.6(5) . . . . ?
C5 C4 C9 C8 0.9(5) . . . . ?
P1 C4 C9 C8 -177.2(3) . . . . ?
C4 P1 C10 C11 98.3(2) . . . . ?
C1 P1 C10 C11 -151.6(2) . . . . ?
Pd1 P1 C10 C11 -30.9(3) . . . . ?
C4 P1 C10 C15 -81.1(2) . . . . ?
C1 P1 C10 C15 28.9(3) . . . . ?
Pd1 P1 C10 C15 149.7(2) . . . . ?
C15 C10 C11 C12 -0.3(4) . . . . ?
P1 C10 C11 C12 -179.7(2) . . . . ?
C10 C11 C12 C13 -0.3(5) . . . . ?
C11 C12 C13 C14 0.7(5) . . . . ?
C12 C13 C14 C15 -0.4(5) . . . . ?
C13 C14 C15 C10 -0.2(5) . . . . ?
C11 C10 C15 C14 0.6(4) . . . . ?
P1 C10 C15 C14 180.0(2) . . . . ?
C22 P2 C16 C17 -173.8(3) . . . . ?
C2 P2 C16 C17 -62.6(3) . . . . ?
Pd1 P2 C16 C17 56.2(3) . . . . ?
C22 P2 C16 C21 7.0(3) . . . . ?
C2 P2 C16 C21 118.1(3) . . . . ?
Pd1 P2 C16 C21 -123.1(2) . . . . ?
C21 C16 C17 C18 0.5(5) . . . . ?
P2 C16 C17 C18 -178.8(3) . . . . ?
C16 C17 C18 C19 1.1(6) . . . . ?
C17 C18 C19 C20 -1.7(6) . . . . ?
C18 C19 C20 C21 0.7(6) . . . . ?
C19 C20 C21 C16 0.9(5) . . . . ?
C17 C16 C21 C20 -1.5(5) . . . . ?
P2 C16 C21 C20 177.8(2) . . . . ?
C16 P2 C22 C27 -117.7(2) . . . . ?
C2 P2 C22 C27 131.4(2) . . . . ?
Pd1 P2 C22 C27 13.2(3) . . . . ?
C16 P2 C22 C23 63.7(3) . . . . ?
C2 P2 C22 C23 -47.3(3) . . . . ?
Pd1 P2 C22 C23 -165.4(2) . . . . ?
C27 C22 C23 C24 0.4(4) . . . . ?
P2 C22 C23 C24 179.0(2) . . . . ?
C22 C23 C24 C25 0.0(5) . . . . ?
C23 C24 C25 C26 -0.1(5) . . . . ?
C24 C25 C26 C27 -0.2(5) . . . . ?
C25 C26 C27 C22 0.5(5) . . . . ?
C23 C22 C27 C26 -0.6(4) . . . . ?
P2 C22 C27 C26 -179.3(2) . . . . ?
C34 C33 C34 C36 -151(5) 3_655 . . . ?
C37 C33 C34 C36 24(5) . . . . ?
C36 C33 C34 C36 -155(5) 3_655 . . . ?
C34 C33 C34 C33 0.000(1) 3_655 . . 3_655 ?
C37 C33 C34 C33 175.1(7) . . . 3_655 ?
C36 C33 C34 C33 -4.8(7) 3_655 . . 3_655 ?
C34 C33 C34 C32 -174.7(10) 3_655 . . . ?
C37 C33 C34 C32 0.4(8) . . . . ?
C36 C33 C34 C32 -179.4(9) 3_655 . . . ?
C37 C33 C34 C34 175.1(7) . . . 3_655 ?
C36 C33 C34 C34 -4.8(7) 3_655 . . 3_655 ?
C34 C33 C34 C37 -175.1(7) 3_655 . . . ?
C36 C33 C34 C37 -179.8(7) 3_655 . . . ?
C34 C33 C34 Cl31 -175.9(8) 3_655 . . . ?
C37 C33 C34 Cl31 -0.8(5) . . . . ?
C36 C33 C34 Cl31 179.3(5) 3_655 . . . ?
C32 C34 C36 C33 178.2(9) . . . 3_655 ?
C34 C34 C36 C33 8.4(12) 3_655 . . 3_655 ?
C33 C34 C36 C33 153(5) . . . 3_655 ?
C37 C34 C36 C33 174.5(7) . . . 3_655 ?
Cl31 C34 C36 C33 -178.6(6) . . . 3_655 ?
C33 C34 C36 Cl31 178.6(6) 3_655 . . . ?
C32 C34 C36 Cl31 -3.1(7) . . . . ?
C34 C34 C36 Cl31 -173.0(12) 3_655 . . . ?
C33 C34 C36 Cl31 -28(5) . . . . ?
C37 C34 C36 Cl31 -6.9(8) . . . . ?
C33 C34 C36 C32 -178.2(9) 3_655 . . . ?
C34 C34 C36 C32 -169.8(15) 3_655 . . . ?
C33 C34 C36 C32 -25(5) . . . . ?
C37 C34 C36 C32 -3.8(10) . . . . ?
Cl31 C34 C36 C32 3.1(7) . . . . ?
C34 C33 C37 C32 5.2(12) 3_655 . . . ?
C36 C33 C37 C32 60(100) 3_655 . . . ?
C34 C33 C37 C32 -0.5(9) . . . . ?
C34 C33 C37 C34 5.6(8) 3_655 . . . ?
C36 C33 C37 C34 60(100) 3_655 . . . ?
C34 C33 C37 Cl31 6.4(10) 3_655 . . . ?
C36 C33 C37 Cl31 61(100) 3_655 . . . ?
C34 C33 C37 Cl31 0.8(5) . . . . ?
C36 C34 C37 C32 4.8(12) . . . . ?
C33 C34 C37 C32 156(3) 3_655 . . . ?
C34 C34 C37 C32 175.6(11) 3_655 . . . ?
C33 C34 C37 C32 179.5(10) . . . . ?
Cl31 C34 C37 C32 -1.4(9) . . . . ?
C36 C34 C37 C33 -174.6(8) . . . . ?
C33 C34 C37 C33 -23(3) 3_655 . . . ?
C32 C34 C37 C33 -179.5(10) . . . . ?
C34 C34 C37 C33 -3.9(5) 3_655 . . . ?
Cl31 C34 C37 C33 179.2(5) . . . . ?
C36 C34 C37 Cl31 6.2(7) . . . . ?
C33 C34 C37 Cl31 158(3) 3_655 . . . ?
C32 C34 C37 Cl31 1.4(9) . . . . ?
C34 C34 C37 Cl31 176.9(7) 3_655 . . . ?
C33 C34 C37 Cl31 -179.2(5) . . . . ?
C34 C36 Cl31 C32 6.6(15) . . . . ?
C33 C36 Cl31 C32 8.6(18) 3_655 . . . ?
C33 C36 Cl31 C34 2.1(9) 3_655 . . . ?
C32 C36 Cl31 C34 -6.6(15) . . . . ?
C34 C36 Cl31 C37 5.5(6) . . . . ?
C33 C36 Cl31 C37 7.6(13) 3_655 . . . ?
C32 C36 Cl31 C37 -1.0(15) . . . . ?
C36 C34 Cl31 C32 -170(2) . . . . ?
C33 C34 Cl31 C32 -172(2) 3_655 . . . ?
C34 C34 Cl31 C32 -9(4) 3_655 . . . ?
C33 C34 Cl31 C32 4(2) . . . . ?
C37 C34 Cl31 C32 3(2) . . . . ?
C33 C34 Cl31 C36 -1.6(7) 3_655 . . . ?
C32 C34 Cl31 C36 170(2) . . . . ?
C34 C34 Cl31 C36 161(3) 3_655 . . . ?
C33 C34 Cl31 C36 174.1(8) . . . . ?
C37 C34 Cl31 C36 173.4(7) . . . . ?
C36 C34 Cl31 C37 -173.4(7) . . . . ?
C33 C34 Cl31 C37 -174.9(7) 3_655 . . . ?
C32 C34 Cl31 C37 -3(2) . . . . ?
C34 C34 Cl31 C37 -12(3) 3_655 . . . ?
C33 C34 Cl31 C37 0.7(4) . . . . ?
C33 C37 Cl31 C32 -9(6) . . . . ?
C34 C37 Cl31 C32 -8(6) . . . . ?
C32 C37 Cl31 C36 4(6) . . . . ?
C33 C37 Cl31 C36 -5.1(7) . . . . ?
C34 C37 Cl31 C36 -4.3(5) . . . . ?
C32 C37 Cl31 C34 8(6) . . . . ?
C33 C37 Cl31 C34 -0.8(5) . . . . ?
C36 Cl31 C32 C37 -176(6) . . . . ?
C34 Cl31 C32 C37 -170(7) . . . . ?
C36 Cl31 C32 C34 -6.5(15) . . . . ?
C37 Cl31 C32 C34 170(7) . . . . ?
C34 Cl31 C32 C36 6.5(15) . . . . ?
C37 Cl31 C32 C36 176(6) . . . . ?
C33 C37 C32 Cl31 172(5) . . . . ?
C34 C37 C32 Cl31 171(6) . . . . ?
C33 C37 C32 C34 0.5(10) . . . . ?
Cl31 C37 C32 C34 -171(6) . . . . ?
C33 C37 C32 C36 -3.7(19) . . . . ?
C34 C37 C32 C36 -4.2(11) . . . . ?
Cl31 C37 C32 C36 -175(7) . . . . ?
C36 C34 C32 Cl31 9(2) . . . . ?
C33 C34 C32 Cl31 11(3) 3_655 . . . ?
C34 C34 C32 Cl31 175.8(17) 3_655 . . . ?
C33 C34 C32 Cl31 -176(2) . . . . ?
C37 C34 C32 Cl31 -176(3) . . . . ?
C36 C34 C32 C37 -175.6(11) . . . . ?
C33 C34 C32 C37 -172.9(10) 3_655 . . . ?
C34 C34 C32 C37 -8(2) 3_655 . . . ?
C33 C34 C32 C37 -0.4(8) . . . . ?
Cl31 C34 C32 C37 176(3) . . . . ?
C33 C34 C32 C36 2.7(14) 3_655 . . . ?
C34 C34 C32 C36 167.2(18) 3_655 . . . ?
C33 C34 C32 C36 175.1(7) . . . . ?
C37 C34 C32 C36 175.6(11) . . . . ?
Cl31 C34 C32 C36 -9(2) . . . . ?
C34 C36 C32 Cl31 -172.5(17) . . . . ?
C33 C36 C32 Cl31 -174.3(12) 3_655 . . . ?
C34 C36 C32 C37 5.6(14) . . . . ?
C33 C36 C32 C37 4(2) 3_655 . . . ?
Cl31 C36 C32 C37 178(3) . . . . ?
C33 C36 C32 C34 -1.8(9) 3_655 . . . ?
Cl31 C36 C32 C34 172.5(17) . . . . ?
 
_diffrn_measured_fraction_theta_max    0.993
_diffrn_reflns_theta_full              28.33
_diffrn_measured_fraction_theta_full   0.993
_refine_diff_density_max    0.773
_refine_diff_density_min   -0.443
_refine_diff_density_rms    0.085
#===END

data_04305
 
_audit_creation_method            SHELXL-97
_chemical_name_systematic
;
 ?
;
_chemical_name_common             ?
_chemical_melting_point           ?
_chemical_formula_moiety          ?
_chemical_formula_sum
 'C34 H31 F3 P2 Pd'
_chemical_formula_weight          664.93
 
loop_
 _atom_type_symbol
 _atom_type_description
 _atom_type_scat_dispersion_real
 _atom_type_scat_dispersion_imag
 _atom_type_scat_source
 'C'  'C'   0.0033   0.0016
 'International Tables Vol C Tables 4.2.6.8 and 6.1.1.4'
 'H'  'H'   0.0000   0.0000
 'International Tables Vol C Tables 4.2.6.8 and 6.1.1.4'
 'F'  'F'   0.0171   0.0103
 'International Tables Vol C Tables 4.2.6.8 and 6.1.1.4'
 'P'  'P'   0.1023   0.0942
 'International Tables Vol C Tables 4.2.6.8 and 6.1.1.4'
 'Pd'  'Pd'  -0.9988   1.0072
 'International Tables Vol C Tables 4.2.6.8 and 6.1.1.4'
 
_symmetry_cell_setting            Monoclinic
_symmetry_space_group_name_H-M    P2(1)/c
 
loop_
 _symmetry_equiv_pos_as_xyz
 'x, y, z'
 '-x, y+1/2, -z+1/2'
 '-x, -y, -z'
 'x, -y-1/2, z-1/2'
 
_cell_length_a                    11.265(4)
_cell_length_b                    22.727(9)
_cell_length_c                    13.333(5)
_cell_angle_alpha                 90.00
_cell_angle_beta                  111.946(7)
_cell_angle_gamma                 90.00
_cell_volume                      3166(2)
_cell_formula_units_Z             4
_cell_measurement_temperature     293(2)
_cell_measurement_reflns_used     ?
_cell_measurement_theta_min       ?
_cell_measurement_theta_max       ?
 
_exptl_crystal_description        iregblok
_exptl_crystal_colour             colourless
_exptl_crystal_size_min           0.320
_exptl_crystal_size_mid           0.320
_exptl_crystal_size_max           0.380
_exptl_crystal_density_meas       ?
_exptl_crystal_density_diffrn     1.395
_exptl_crystal_density_method     'not measured'
_exptl_crystal_F_000              1352
_exptl_absorpt_coefficient_mu     0.726
_exptl_absorpt_correction_type    none
_exptl_absorpt_correction_T_min   ?
_exptl_absorpt_correction_T_max   ?
_exptl_absorpt_process_details    ?
 
_exptl_special_details
;
 ?
;
 
_diffrn_ambient_temperature       293(2)
_diffrn_radiation_wavelength      0.71073
_diffrn_radiation_type            MoK\a
_diffrn_radiation_source          'fine-focus sealed tube'
_diffrn_radiation_monochromator   graphite
_diffrn_measurement_device_type   'Bruker P4'
_diffrn_measurement_method        '\w scans'
_diffrn_detector_area_resol_mean  ?
_diffrn_standards_number          ?
_diffrn_standards_interval_count  ?
_diffrn_standards_interval_time   ?
_diffrn_standards_decay_%         ?
_diffrn_reflns_number             31729
_diffrn_reflns_av_R_equivalents   0.0323
_diffrn_reflns_av_sigmaI/netI     0.0283
_diffrn_reflns_limit_h_min        -14
_diffrn_reflns_limit_h_max        14
_diffrn_reflns_limit_k_min        -29
_diffrn_reflns_limit_k_max        30
_diffrn_reflns_limit_l_min        -17
_diffrn_reflns_limit_l_max        17
_diffrn_reflns_theta_min          1.79
_diffrn_reflns_theta_max          28.29
_reflns_number_total              7843
_reflns_number_gt                 6930
_reflns_threshold_expression      >2sigma(I)
 
_computing_data_collection        'Bruker XSCANS'
_computing_cell_refinement        'Bruker XSCANS'
_computing_data_reduction         'Bruker SHELXTL'
_computing_structure_solution     'SHELXS-97 (Sheldrick, 1990)'
_computing_structure_refinement   'SHELXL-97 (Sheldrick, 1997)'
_computing_molecular_graphics     'Bruker SHELXTL'
_computing_publication_material   'Bruker SHELXTL'
 
_refine_special_details
;
 Refinement of F^2^ against ALL reflections.  The weighted R-factor wR and
 goodness of fit S are based on F^2^, conventional R-factors R are based
 on F, with F set to zero for negative F^2^. The threshold expression of
 F^2^ > 2sigma(F^2^) is used only for calculating R-factors(gt) etc. and is
 not relevant to the choice of reflections for refinement.  R-factors based
 on F^2^ are statistically about twice as large as those based on F, and R-
 factors based on ALL data will be even larger.
;
 
_refine_ls_structure_factor_coef  Fsqd
_refine_ls_matrix_type            full
_refine_ls_weighting_scheme       calc
_refine_ls_weighting_details
 'calc w=1/[\s^2^(Fo^2^)+(0.0417P)^2^+0.5000P] where P=(Fo^2^+2Fc^2^)/3'
_atom_sites_solution_primary      direct
_atom_sites_solution_secondary    difmap
_atom_sites_solution_hydrogens    geom
_refine_ls_hydrogen_treatment     riding
_refine_ls_extinction_method      none
_refine_ls_extinction_coef        ?
_refine_ls_number_reflns          7843
_refine_ls_number_parameters      361
_refine_ls_number_restraints      0
_refine_ls_R_factor_all           0.0308
_refine_ls_R_factor_gt            0.0270
_refine_ls_wR_factor_ref          0.0755
_refine_ls_wR_factor_gt           0.0731
_refine_ls_goodness_of_fit_ref    1.060
_refine_ls_restrained_S_all       1.060
_refine_ls_shift/su_max           0.002
_refine_ls_shift/su_mean          0.000
 
loop_
 _atom_site_label
 _atom_site_type_symbol
 _atom_site_fract_x
 _atom_site_fract_y
 _atom_site_fract_z
 _atom_site_U_iso_or_equiv
 _atom_site_adp_type
 _atom_site_occupancy
 _atom_site_symmetry_multiplicity
 _atom_site_calc_flag
 _atom_site_refinement_flags
 _atom_site_disorder_assembly
 _atom_site_disorder_group
Pd1 Pd 1.008210(11) 0.184228(5) 0.253262(8) 0.02152(5) Uani 1 1 d . . .
P1 P 0.99669(4) 0.100084(17) 0.34646(3) 0.02179(9) Uani 1 1 d . . .
P2 P 0.80888(4) 0.219685(19) 0.24674(3) 0.02513(9) Uani 1 1 d . . .
F1 F 1.08237(14) 0.24049(5) 0.08633(10) 0.0535(3) Uani 1 1 d . . .
F2 F 1.14683(13) 0.28880(5) 0.23520(10) 0.0526(3) Uani 1 1 d . . .
F3 F 0.95191(12) 0.29483(5) 0.12587(10) 0.0492(3) Uani 1 1 d . . .
C1 C 0.89568(16) 0.10105(7) 0.42730(13) 0.0265(3) Uani 1 1 d . . .
H1A H 0.8869 0.0611 0.4490 0.032 Uiso 1 1 calc R . .
H1B H 0.9389 0.1236 0.4925 0.032 Uiso 1 1 calc R . .
C2 C 0.76205(16) 0.12686(8) 0.36955(14) 0.0292(3) Uani 1 1 d . . .
H2A H 0.7242 0.1091 0.2985 0.035 Uiso 1 1 calc R . .
H2B H 0.7090 0.1166 0.4099 0.035 Uiso 1 1 calc R . .
C3 C 0.76134(18) 0.19367(8) 0.35680(14) 0.0301(4) Uani 1 1 d . . .
H3A H 0.8188 0.2107 0.4242 0.036 Uiso 1 1 calc R . .
H3B H 0.6759 0.2081 0.3442 0.036 Uiso 1 1 calc R . .
C4 C 1.04819(17) 0.25439(8) 0.17181(13) 0.0306(4) Uani 1 1 d . . .
C5 C 1.18220(15) 0.15225(7) 0.26146(13) 0.0256(3) Uani 1 1 d . . .
C6 C 1.29512(17) 0.16892(8) 0.34585(14) 0.0320(4) Uani 1 1 d . . .
H6A H 1.2912 0.1964 0.3963 0.038 Uiso 1 1 calc R . .
C7 C 1.41352(17) 0.14527(9) 0.35608(15) 0.0387(4) Uani 1 1 d . . .
H7A H 1.4873 0.1570 0.4129 0.046 Uiso 1 1 calc R . .
C8 C 1.42140(18) 0.10454(9) 0.28210(17) 0.0397(4) Uani 1 1 d . . .
H8A H 1.4999 0.0882 0.2895 0.048 Uiso 1 1 calc R . .
C9 C 1.31133(18) 0.08819(9) 0.19679(16) 0.0374(4) Uani 1 1 d . . .
H9A H 1.3160 0.0613 0.1458 0.045 Uiso 1 1 calc R . .
C10 C 1.19369(17) 0.11188(8) 0.18715(14) 0.0318(4) Uani 1 1 d . . .
H10A H 1.1206 0.1004 0.1294 0.038 Uiso 1 1 calc R . .
C11 C 1.14849(16) 0.07595(7) 0.44776(13) 0.0254(3) Uani 1 1 d . . .
C12 C 1.20366(18) 0.11090(9) 0.53984(15) 0.0370(4) Uani 1 1 d . . .
H12A H 1.1621 0.1449 0.5479 0.044 Uiso 1 1 calc R . .
C13 C 1.3196(2) 0.09537(11) 0.61913(16) 0.0489(5) Uani 1 1 d . . .
H13A H 1.3553 0.1189 0.6802 0.059 Uiso 1 1 calc R . .
C14 C 1.38289(19) 0.04492(11) 0.60799(16) 0.0477(5) Uani 1 1 d . . .
H14A H 1.4596 0.0340 0.6623 0.057 Uiso 1 1 calc R . .
C15 C 1.33186(19) 0.01119(9) 0.51660(17) 0.0412(4) Uani 1 1 d . . .
H15A H 1.3754 -0.0220 0.5081 0.049 Uiso 1 1 calc R . .
C16 C 1.21485(17) 0.02643(8) 0.43625(14) 0.0315(4) Uani 1 1 d . . .
H16A H 1.1810 0.0033 0.3745 0.038 Uiso 1 1 calc R . .
C17 C 0.93303(15) 0.03830(7) 0.25538(12) 0.0244(3) Uani 1 1 d . . .
C18 C 0.92040(18) -0.01786(8) 0.29314(14) 0.0334(4) Uani 1 1 d . . .
H18A H 0.9453 -0.0243 0.3671 0.040 Uiso 1 1 calc R . .
C19 C 0.8712(2) -0.06400(8) 0.22158(17) 0.0397(4) Uani 1 1 d . . .
H19A H 0.8640 -0.1013 0.2476 0.048 Uiso 1 1 calc R . .
C20 C 0.8326(2) -0.05459(9) 0.11147(17) 0.0411(4) Uani 1 1 d . . .
H20A H 0.8000 -0.0856 0.0635 0.049 Uiso 1 1 calc R . .
C21 C 0.8426(2) 0.00085(9) 0.07253(15) 0.0388(4) Uani 1 1 d . . .
H21A H 0.8159 0.0072 -0.0016 0.047 Uiso 1 1 calc R . .
C22 C 0.89240(17) 0.04721(8) 0.14424(13) 0.0292(3) Uani 1 1 d . . .
H22A H 0.8986 0.0844 0.1177 0.035 Uiso 1 1 calc R . .
C23 C 0.79745(17) 0.29913(8) 0.26105(14) 0.0293(3) Uani 1 1 d . . .
C24 C 0.8845(2) 0.32588(8) 0.35360(16) 0.0370(4) Uani 1 1 d . . .
H24A H 0.9459 0.3032 0.4054 0.044 Uiso 1 1 calc R . .
C25 C 0.8798(2) 0.38612(9) 0.36871(19) 0.0489(5) Uani 1 1 d . . .
H25A H 0.9369 0.4035 0.4313 0.059 Uiso 1 1 calc R . .
C26 C 0.7909(3) 0.42018(9) 0.2915(2) 0.0559(6) Uani 1 1 d . . .
H26A H 0.7883 0.4606 0.3017 0.067 Uiso 1 1 calc R . .
C27 C 0.7058(3) 0.39451(10) 0.1992(2) 0.0557(6) Uani 1 1 d . . .
H27A H 0.6462 0.4177 0.1469 0.067 Uiso 1 1 calc R . .
C28 C 0.7082(2) 0.33419(9) 0.18356(17) 0.0416(4) Uani 1 1 d . . .
H28A H 0.6500 0.3172 0.1211 0.050 Uiso 1 1 calc R . .
C29 C 0.67153(16) 0.20201(8) 0.12429(13) 0.0284(3) Uani 1 1 d . . .
C30 C 0.54532(19) 0.20400(9) 0.12019(16) 0.0391(4) Uani 1 1 d . . .
H30A H 0.5299 0.2123 0.1826 0.047 Uiso 1 1 calc R . .
C31 C 0.4433(2) 0.19373(10) 0.02368(18) 0.0465(5) Uani 1 1 d . . .
H31A H 0.3599 0.1952 0.0216 0.056 Uiso 1 1 calc R . .
C32 C 0.4654(2) 0.18127(9) -0.06937(18) 0.0472(5) Uani 1 1 d . . .
H32A H 0.3968 0.1749 -0.1341 0.057 Uiso 1 1 calc R . .
C33 C 0.5899(2) 0.17823(9) -0.06637(17) 0.0441(5) Uani 1 1 d . . .
H33A H 0.6046 0.1694 -0.1289 0.053 Uiso 1 1 calc R . .
C34 C 0.69246(19) 0.18836(8) 0.03028(14) 0.0340(4) Uani 1 1 d . . .
H34A H 0.7757 0.1860 0.0322 0.041 Uiso 1 1 calc R . .
 
loop_
 _atom_site_aniso_label
 _atom_site_aniso_U_11
 _atom_site_aniso_U_22
 _atom_site_aniso_U_33
 _atom_site_aniso_U_23
 _atom_site_aniso_U_13
 _atom_site_aniso_U_12
Pd1 0.02375(8) 0.01829(8) 0.02222(7) 0.00172(4) 0.00823(5) -0.00006(4)
P1 0.0224(2) 0.01946(19) 0.02248(18) 0.00225(14) 0.00727(15) 0.00042(15)
P2 0.0270(2) 0.0230(2) 0.02480(19) 0.00356(15) 0.00903(16) 0.00410(16)
F1 0.0867(10) 0.0407(7) 0.0511(7) 0.0088(5) 0.0467(7) 0.0017(6)
F2 0.0570(8) 0.0288(6) 0.0575(7) 0.0070(5) 0.0046(6) -0.0163(5)
F3 0.0501(7) 0.0442(7) 0.0560(7) 0.0295(6) 0.0227(6) 0.0140(6)
C1 0.0291(8) 0.0260(8) 0.0263(7) 0.0056(6) 0.0124(6) 0.0026(6)
C2 0.0272(8) 0.0314(9) 0.0316(8) 0.0056(7) 0.0141(7) 0.0023(7)
C3 0.0322(9) 0.0317(9) 0.0290(8) 0.0051(7) 0.0142(7) 0.0080(7)
C4 0.0356(9) 0.0260(8) 0.0304(8) 0.0040(6) 0.0123(7) -0.0015(7)
C5 0.0230(8) 0.0267(8) 0.0277(7) 0.0025(6) 0.0100(6) -0.0018(6)
C6 0.0316(9) 0.0317(9) 0.0327(8) -0.0060(7) 0.0122(7) -0.0067(7)
C7 0.0232(9) 0.0484(11) 0.0388(9) -0.0045(8) 0.0052(7) -0.0068(8)
C8 0.0235(9) 0.0474(11) 0.0491(11) -0.0002(9) 0.0145(8) 0.0018(8)
C9 0.0295(9) 0.0425(11) 0.0420(10) -0.0106(8) 0.0155(8) -0.0010(8)
C10 0.0244(8) 0.0376(10) 0.0315(8) -0.0060(7) 0.0083(7) -0.0035(7)
C11 0.0227(8) 0.0277(8) 0.0245(7) 0.0050(6) 0.0073(6) -0.0013(6)
C12 0.0321(10) 0.0442(11) 0.0323(9) -0.0066(8) 0.0094(7) -0.0013(8)
C13 0.0369(11) 0.0747(16) 0.0287(9) -0.0089(9) 0.0050(8) -0.0068(11)
C14 0.0276(10) 0.0736(15) 0.0352(10) 0.0149(10) 0.0038(8) 0.0055(10)
C15 0.0314(10) 0.0424(11) 0.0492(11) 0.0135(9) 0.0145(8) 0.0106(8)
C16 0.0284(9) 0.0303(9) 0.0339(8) 0.0039(7) 0.0095(7) 0.0029(7)
C17 0.0220(7) 0.0221(8) 0.0272(7) 0.0001(6) 0.0070(6) -0.0003(6)
C18 0.0397(10) 0.0260(9) 0.0308(8) 0.0029(6) 0.0090(7) -0.0039(7)
C19 0.0465(11) 0.0223(9) 0.0483(11) 0.0007(7) 0.0154(9) -0.0058(7)
C20 0.0442(11) 0.0318(9) 0.0446(11) -0.0110(8) 0.0136(9) -0.0121(8)
C21 0.0440(11) 0.0384(10) 0.0299(9) -0.0044(7) 0.0092(8) -0.0092(9)
C22 0.0308(9) 0.0256(8) 0.0290(8) 0.0018(6) 0.0085(7) -0.0041(7)
C23 0.0321(9) 0.0249(8) 0.0341(8) 0.0032(7) 0.0160(7) 0.0054(7)
C24 0.0421(11) 0.0327(9) 0.0395(10) -0.0014(7) 0.0187(9) -0.0009(8)
C25 0.0664(15) 0.0390(11) 0.0526(12) -0.0121(9) 0.0353(11) -0.0119(10)
C26 0.0929(19) 0.0238(10) 0.0724(16) 0.0007(10) 0.0554(15) 0.0058(11)
C27 0.0730(16) 0.0351(11) 0.0665(15) 0.0183(10) 0.0348(13) 0.0219(11)
C28 0.0476(12) 0.0319(10) 0.0439(10) 0.0092(8) 0.0156(9) 0.0109(9)
C29 0.0277(8) 0.0267(8) 0.0282(8) 0.0041(6) 0.0075(7) 0.0013(7)
C30 0.0334(10) 0.0439(11) 0.0393(10) 0.0019(8) 0.0127(8) 0.0025(8)
C31 0.0288(10) 0.0532(13) 0.0507(12) 0.0028(10) 0.0070(9) -0.0025(9)
C32 0.0415(12) 0.0498(13) 0.0377(10) -0.0001(8) 0.0002(9) -0.0069(9)
C33 0.0481(13) 0.0484(12) 0.0324(9) -0.0022(8) 0.0109(9) -0.0039(9)
C34 0.0349(10) 0.0356(10) 0.0312(9) 0.0007(7) 0.0118(8) -0.0018(7)
 
_geom_special_details
;
 All esds (except the esd in the dihedral angle between two l.s. planes)
 are estimated using the full covariance matrix.  The cell esds are taken
 into account individually in the estimation of esds in distances, angles
 and torsion angles; correlations between esds in cell parameters are only
 used when they are defined by crystal symmetry.  An approximate (isotropic)
 treatment of cell esds is used for estimating esds involving l.s. planes.
;
 
loop_
 _geom_bond_atom_site_label_1
 _geom_bond_atom_site_label_2
 _geom_bond_distance
 _geom_bond_site_symmetry_2
 _geom_bond_publ_flag
Pd1 C5 2.0546(18) . ?
Pd1 C4 2.0713(18) . ?
Pd1 P1 2.3105(8) . ?
Pd1 P2 2.3564(9) . ?
P1 C17 1.8192(17) . ?
P1 C11 1.8229(17) . ?
P1 C1 1.8367(17) . ?
P2 C23 1.8252(19) . ?
P2 C29 1.8256(18) . ?
P2 C3 1.8378(18) . ?
F1 C4 1.369(2) . ?
F2 C4 1.363(2) . ?
F3 C4 1.378(2) . ?
C1 C2 1.529(2) . ?
C2 C3 1.527(2) . ?
C5 C10 1.391(2) . ?
C5 C6 1.399(2) . ?
C6 C7 1.397(3) . ?
C7 C8 1.380(3) . ?
C8 C9 1.384(3) . ?
C9 C10 1.391(3) . ?
C11 C16 1.391(2) . ?
C11 C12 1.398(2) . ?
C12 C13 1.384(3) . ?
C13 C14 1.387(3) . ?
C14 C15 1.371(3) . ?
C15 C16 1.396(3) . ?
C17 C22 1.392(2) . ?
C17 C18 1.399(2) . ?
C18 C19 1.386(3) . ?
C19 C20 1.383(3) . ?
C20 C21 1.383(3) . ?
C21 C22 1.392(2) . ?
C23 C28 1.392(3) . ?
C23 C24 1.396(3) . ?
C24 C25 1.388(3) . ?
C25 C26 1.375(4) . ?
C26 C27 1.376(4) . ?
C27 C28 1.388(3) . ?
C29 C34 1.394(3) . ?
C29 C30 1.403(3) . ?
C30 C31 1.387(3) . ?
C31 C32 1.382(3) . ?
C32 C33 1.390(3) . ?
C33 C34 1.391(3) . ?
 
loop_
 _geom_angle_atom_site_label_1
 _geom_angle_atom_site_label_2
 _geom_angle_atom_site_label_3
 _geom_angle
 _geom_angle_site_symmetry_1
 _geom_angle_site_symmetry_3
 _geom_angle_publ_flag
C5 Pd1 C4 84.85(7) . . ?
C5 Pd1 P1 85.57(5) . . ?
C4 Pd1 P1 170.42(5) . . ?
C5 Pd1 P2 178.86(5) . . ?
C4 Pd1 P2 96.21(5) . . ?
P1 Pd1 P2 93.36(2) . . ?
C17 P1 C11 106.80(8) . . ?
C17 P1 C1 102.99(8) . . ?
C11 P1 C1 100.61(8) . . ?
C17 P1 Pd1 111.54(6) . . ?
C11 P1 Pd1 114.95(6) . . ?
C1 P1 Pd1 118.51(6) . . ?
C23 P2 C29 104.00(8) . . ?
C23 P2 C3 100.47(8) . . ?
C29 P2 C3 103.93(9) . . ?
C23 P2 Pd1 115.97(6) . . ?
C29 P2 Pd1 115.80(6) . . ?
C3 P2 Pd1 114.74(6) . . ?
C2 C1 P1 114.74(11) . . ?
C3 C2 C1 113.62(15) . . ?
C2 C3 P2 114.69(12) . . ?
F2 C4 F1 103.33(15) . . ?
F2 C4 F3 102.52(14) . . ?
F1 C4 F3 101.73(13) . . ?
F2 C4 Pd1 113.77(11) . . ?
F1 C4 Pd1 116.28(12) . . ?
F3 C4 Pd1 117.21(12) . . ?
C10 C5 C6 116.91(16) . . ?
C10 C5 Pd1 122.42(12) . . ?
C6 C5 Pd1 120.63(13) . . ?
C7 C6 C5 121.49(17) . . ?
C8 C7 C6 120.18(17) . . ?
C7 C8 C9 119.37(17) . . ?
C8 C9 C10 120.13(17) . . ?
C9 C10 C5 121.89(16) . . ?
C16 C11 C12 118.41(16) . . ?
C16 C11 P1 123.76(13) . . ?
C12 C11 P1 117.76(14) . . ?
C13 C12 C11 120.58(19) . . ?
C12 C13 C14 120.33(19) . . ?
C15 C14 C13 119.73(18) . . ?
C14 C15 C16 120.35(19) . . ?
C11 C16 C15 120.54(18) . . ?
C22 C17 C18 118.58(15) . . ?
C22 C17 P1 119.27(12) . . ?
C18 C17 P1 122.12(13) . . ?
C19 C18 C17 120.72(17) . . ?
C20 C19 C18 119.98(17) . . ?
C21 C20 C19 120.13(17) . . ?
C20 C21 C22 120.00(17) . . ?
C21 C22 C17 120.58(16) . . ?
C28 C23 C24 118.73(18) . . ?
C28 C23 P2 123.26(15) . . ?
C24 C23 P2 118.00(14) . . ?
C25 C24 C23 120.4(2) . . ?
C26 C25 C24 120.2(2) . . ?
C25 C26 C27 120.0(2) . . ?
C26 C27 C28 120.4(2) . . ?
C27 C28 C23 120.2(2) . . ?
C34 C29 C30 118.78(16) . . ?
C34 C29 P2 118.78(14) . . ?
C30 C29 P2 122.39(14) . . ?
C31 C30 C29 120.43(19) . . ?
C32 C31 C30 120.2(2) . . ?
C31 C32 C33 120.1(2) . . ?
C32 C33 C34 119.9(2) . . ?
C33 C34 C29 120.56(19) . . ?
 
loop_
 _geom_torsion_atom_site_label_1
 _geom_torsion_atom_site_label_2
 _geom_torsion_atom_site_label_3
 _geom_torsion_atom_site_label_4
 _geom_torsion
 _geom_torsion_site_symmetry_1
 _geom_torsion_site_symmetry_2
 _geom_torsion_site_symmetry_3
 _geom_torsion_site_symmetry_4
 _geom_torsion_publ_flag
C5 Pd1 P1 C17 -85.12(7) . . . . ?
C4 Pd1 P1 C17 -86.6(3) . . . . ?
P2 Pd1 P1 C17 95.27(6) . . . . ?
C5 Pd1 P1 C11 36.64(8) . . . . ?
C4 Pd1 P1 C11 35.1(3) . . . . ?
P2 Pd1 P1 C11 -142.97(6) . . . . ?
C5 Pd1 P1 C1 155.58(8) . . . . ?
C4 Pd1 P1 C1 154.1(3) . . . . ?
P2 Pd1 P1 C1 -24.04(6) . . . . ?
C5 Pd1 P2 C23 123(2) . . . . ?
C4 Pd1 P2 C23 -36.71(8) . . . . ?
P1 Pd1 P2 C23 142.98(7) . . . . ?
C5 Pd1 P2 C29 -115(2) . . . . ?
C4 Pd1 P2 C29 85.59(8) . . . . ?
P1 Pd1 P2 C29 -94.73(7) . . . . ?
C5 Pd1 P2 C3 7(2) . . . . ?
C4 Pd1 P2 C3 -153.27(8) . . . . ?
P1 Pd1 P2 C3 26.41(7) . . . . ?
C17 P1 C1 C2 -76.77(14) . . . . ?
C11 P1 C1 C2 173.05(13) . . . . ?
Pd1 P1 C1 C2 46.88(14) . . . . ?
P1 C1 C2 C3 -73.06(17) . . . . ?
C1 C2 C3 P2 78.37(17) . . . . ?
C23 P2 C3 C2 -179.21(13) . . . . ?
C29 P2 C3 C2 73.37(14) . . . . ?
Pd1 P2 C3 C2 -54.07(14) . . . . ?
C5 Pd1 C4 F2 -68.49(14) . . . . ?
P1 Pd1 C4 F2 -67.0(3) . . . . ?
P2 Pd1 C4 F2 111.12(13) . . . . ?
C5 Pd1 C4 F1 51.41(13) . . . . ?
P1 Pd1 C4 F1 52.9(4) . . . . ?
P2 Pd1 C4 F1 -128.98(13) . . . . ?
C5 Pd1 C4 F3 171.99(14) . . . . ?
P1 Pd1 C4 F3 173.5(2) . . . . ?
P2 Pd1 C4 F3 -8.41(13) . . . . ?
C4 Pd1 C5 C10 -95.88(15) . . . . ?
P1 Pd1 C5 C10 84.37(14) . . . . ?
P2 Pd1 C5 C10 104(2) . . . . ?
C4 Pd1 C5 C6 86.55(14) . . . . ?
P1 Pd1 C5 C6 -93.20(14) . . . . ?
P2 Pd1 C5 C6 -73(3) . . . . ?
C10 C5 C6 C7 -1.2(3) . . . . ?
Pd1 C5 C6 C7 176.54(14) . . . . ?
C5 C6 C7 C8 0.1(3) . . . . ?
C6 C7 C8 C9 1.1(3) . . . . ?
C7 C8 C9 C10 -1.2(3) . . . . ?
C8 C9 C10 C5 0.1(3) . . . . ?
C6 C5 C10 C9 1.1(3) . . . . ?
Pd1 C5 C10 C9 -176.55(15) . . . . ?
C17 P1 C11 C16 16.10(17) . . . . ?
C1 P1 C11 C16 123.28(15) . . . . ?
Pd1 P1 C11 C16 -108.20(14) . . . . ?
C17 P1 C11 C12 -166.92(14) . . . . ?
C1 P1 C11 C12 -59.74(15) . . . . ?
Pd1 P1 C11 C12 68.78(15) . . . . ?
C16 C11 C12 C13 -2.1(3) . . . . ?
P1 C11 C12 C13 -179.20(16) . . . . ?
C11 C12 C13 C14 0.2(3) . . . . ?
C12 C13 C14 C15 1.8(3) . . . . ?
C13 C14 C15 C16 -1.9(3) . . . . ?
C12 C11 C16 C15 2.0(3) . . . . ?
P1 C11 C16 C15 178.91(14) . . . . ?
C14 C15 C16 C11 0.0(3) . . . . ?
C11 P1 C17 C22 -129.85(14) . . . . ?
C1 P1 C17 C22 124.66(14) . . . . ?
Pd1 P1 C17 C22 -3.49(15) . . . . ?
C11 P1 C17 C18 51.79(16) . . . . ?
C1 P1 C17 C18 -53.70(16) . . . . ?
Pd1 P1 C17 C18 178.15(13) . . . . ?
C22 C17 C18 C19 1.4(3) . . . . ?
P1 C17 C18 C19 179.81(16) . . . . ?
C17 C18 C19 C20 -0.7(3) . . . . ?
C18 C19 C20 C21 -0.3(3) . . . . ?
C19 C20 C21 C22 0.6(3) . . . . ?
C20 C21 C22 C17 0.2(3) . . . . ?
C18 C17 C22 C21 -1.2(3) . . . . ?
P1 C17 C22 C21 -179.62(15) . . . . ?
C29 P2 C23 C28 -6.45(18) . . . . ?
C3 P2 C23 C28 -113.81(17) . . . . ?
Pd1 P2 C23 C28 121.89(16) . . . . ?
C29 P2 C23 C24 174.80(14) . . . . ?
C3 P2 C23 C24 67.44(16) . . . . ?
Pd1 P2 C23 C24 -56.86(16) . . . . ?
C28 C23 C24 C25 1.4(3) . . . . ?
P2 C23 C24 C25 -179.79(16) . . . . ?
C23 C24 C25 C26 -1.3(3) . . . . ?
C24 C25 C26 C27 0.4(4) . . . . ?
C25 C26 C27 C28 0.5(4) . . . . ?
C26 C27 C28 C23 -0.4(4) . . . . ?
C24 C23 C28 C27 -0.5(3) . . . . ?
P2 C23 C28 C27 -179.29(17) . . . . ?
C23 P2 C29 C34 106.38(15) . . . . ?
C3 P2 C29 C34 -148.86(14) . . . . ?
Pd1 P2 C29 C34 -22.07(16) . . . . ?
C23 P2 C29 C30 -70.94(17) . . . . ?
C3 P2 C29 C30 33.83(17) . . . . ?
Pd1 P2 C29 C30 160.61(14) . . . . ?
C34 C29 C30 C31 -1.3(3) . . . . ?
P2 C29 C30 C31 176.03(16) . . . . ?
C29 C30 C31 C32 0.2(3) . . . . ?
C30 C31 C32 C33 0.8(3) . . . . ?
C31 C32 C33 C34 -0.7(3) . . . . ?
C32 C33 C34 C29 -0.5(3) . . . . ?
C30 C29 C34 C33 1.4(3) . . . . ?
P2 C29 C34 C33 -175.98(15) . . . . ?
 
_diffrn_measured_fraction_theta_max    0.997
_diffrn_reflns_theta_full              28.29
_diffrn_measured_fraction_theta_full   0.997
_refine_diff_density_max    0.608
_refine_diff_density_min   -0.480
_refine_diff_density_rms    0.064
#===END

data_04306
 
_audit_creation_method            SHELXL-97
_chemical_name_systematic
;
 ?
;
_chemical_name_common             ?
_chemical_melting_point           ?
_chemical_formula_moiety          ?
_chemical_formula_sum
 'C27 H24 F3 I P2 Pd'
_chemical_formula_weight          700.70
 
loop_
 _atom_type_symbol
 _atom_type_description
 _atom_type_scat_dispersion_real
 _atom_type_scat_dispersion_imag
 _atom_type_scat_source
 'C'  'C'   0.0033   0.0016
 'International Tables Vol C Tables 4.2.6.8 and 6.1.1.4'
 'H'  'H'   0.0000   0.0000
 'International Tables Vol C Tables 4.2.6.8 and 6.1.1.4'
 'F'  'F'   0.0171   0.0103
 'International Tables Vol C Tables 4.2.6.8 and 6.1.1.4'
 'I'  'I'  -0.4742   1.8119
 'International Tables Vol C Tables 4.2.6.8 and 6.1.1.4'
 'P'  'P'   0.1023   0.0942
 'International Tables Vol C Tables 4.2.6.8 and 6.1.1.4'
 'Pd'  'Pd'  -0.9988   1.0072
 'International Tables Vol C Tables 4.2.6.8 and 6.1.1.4'
 
_symmetry_cell_setting            Orthorhombic
_symmetry_space_group_name_H-M    P2(1)2(1)2(1)
 
loop_
 _symmetry_equiv_pos_as_xyz
 'x, y, z'
 '-x+1/2, -y, z+1/2'
 'x+1/2, -y+1/2, -z'
 '-x, y+1/2, -z+1/2'
 
_cell_length_a                    8.625(4)
_cell_length_b                    13.616(6)
_cell_length_c                    22.834(10)
_cell_angle_alpha                 90.00
_cell_angle_beta                  90.00
_cell_angle_gamma                 90.00
_cell_volume                      2682(2)
_cell_formula_units_Z             4
_cell_measurement_temperature     293(2)
_cell_measurement_reflns_used     ?
_cell_measurement_theta_min       ?
_cell_measurement_theta_max       ?
 
_exptl_crystal_description        prism
_exptl_crystal_colour             gold
_exptl_crystal_size_min           0.100
_exptl_crystal_size_mid           0.130
_exptl_crystal_size_max           0.370
_exptl_crystal_density_meas       ?
_exptl_crystal_density_diffrn     1.736
_exptl_crystal_density_method     'not measured'
_exptl_crystal_F_000              1368
_exptl_absorpt_coefficient_mu     1.997
_exptl_absorpt_correction_type    none
_exptl_absorpt_correction_T_min   ?
_exptl_absorpt_correction_T_max   ?
_exptl_absorpt_process_details    ?
 
_exptl_special_details
;
 ?
;
 
_diffrn_ambient_temperature       293(2)
_diffrn_radiation_wavelength      0.71073
_diffrn_radiation_type            MoK\a
_diffrn_radiation_source          'fine-focus sealed tube'
_diffrn_radiation_monochromator   graphite
_diffrn_measurement_device_type   'Bruker P4'
_diffrn_measurement_method        '\w scans'
_diffrn_detector_area_resol_mean  ?
_diffrn_standards_number          ?
_diffrn_standards_interval_count  ?
_diffrn_standards_interval_time   ?
_diffrn_standards_decay_%         ?
_diffrn_reflns_number             47171
_diffrn_reflns_av_R_equivalents   0.0557
_diffrn_reflns_av_sigmaI/netI     0.0332
_diffrn_reflns_limit_h_min        -11
_diffrn_reflns_limit_h_max        11
_diffrn_reflns_limit_k_min        -18
_diffrn_reflns_limit_k_max        18
_diffrn_reflns_limit_l_min        -30
_diffrn_reflns_limit_l_max        30
_diffrn_reflns_theta_min          1.74
_diffrn_reflns_theta_max          28.32
_reflns_number_total              6646
_reflns_number_gt                 6374
_reflns_threshold_expression      >2sigma(I)
 
_computing_data_collection        'Bruker XSCANS'
_computing_cell_refinement        'Bruker XSCANS'
_computing_data_reduction         'Bruker SHELXTL'
_computing_structure_solution     'SHELXS-97 (Sheldrick, 1990)'
_computing_structure_refinement   'SHELXL-97 (Sheldrick, 1997)'
_computing_molecular_graphics     'Bruker SHELXTL'
_computing_publication_material   'Bruker SHELXTL'
 
_refine_special_details
;
 Refinement of F^2^ against ALL reflections.  The weighted R-factor wR and
 goodness of fit S are based on F^2^, conventional R-factors R are based
 on F, with F set to zero for negative F^2^. The threshold expression of
 F^2^ > 2sigma(F^2^) is used only for calculating R-factors(gt) etc. and is
 not relevant to the choice of reflections for refinement.  R-factors based
 on F^2^ are statistically about twice as large as those based on F, and R-
 factors based on ALL data will be even larger.
;
 
_refine_ls_structure_factor_coef  Fsqd
_refine_ls_matrix_type            full
_refine_ls_weighting_scheme       calc
_refine_ls_weighting_details
 'calc w=1/[\s^2^(Fo^2^)+(0.0372P)^2^+2.6420P] where P=(Fo^2^+2Fc^2^)/3'
_atom_sites_solution_primary      direct
_atom_sites_solution_secondary    difmap
_atom_sites_solution_hydrogens    geom
_refine_ls_hydrogen_treatment     riding
_refine_ls_extinction_method      none
_refine_ls_extinction_coef        ?
_refine_ls_abs_structure_details
 'Flack H D (1983), Acta Cryst. A39, 876-881'
_refine_ls_abs_structure_Flack    0.039(19)
_refine_ls_number_reflns          6646
_refine_ls_number_parameters      314
_refine_ls_number_restraints      0
_refine_ls_R_factor_all           0.0300
_refine_ls_R_factor_gt            0.0284
_refine_ls_wR_factor_ref          0.0817
_refine_ls_wR_factor_gt           0.0808
_refine_ls_goodness_of_fit_ref    1.091
_refine_ls_restrained_S_all       1.091
_refine_ls_shift/su_max           0.001
_refine_ls_shift/su_mean          0.000
 
loop_
 _atom_site_label
 _atom_site_type_symbol
 _atom_site_fract_x
 _atom_site_fract_y
 _atom_site_fract_z
 _atom_site_U_iso_or_equiv
 _atom_site_adp_type
 _atom_site_occupancy
 _atom_site_symmetry_multiplicity
 _atom_site_calc_flag
 _atom_site_refinement_flags
 _atom_site_disorder_assembly
 _atom_site_disorder_group
I1' I 0.6218(3) 0.0042(2) 0.41540(15) 0.0445(9) Uani 0.1399(13) 1 d P A 2
I1 I 0.61376(3) 0.20466(2) 0.297223(15) 0.03610(10) Uani 0.8601(13) 1 d P A 1
C3 C 0.5963(9) 0.0229(5) 0.4036(3) 0.0364(19) Uiso 0.8601(13) 1 d P A 1
Pd1 Pd 0.41564(3) 0.08568(2) 0.350052(12) 0.02603(7) Uani 1 1 d . A 1
P1 P 0.22670(11) -0.00587(7) 0.39103(4) 0.02497(18) Uani 1 1 d . A 1
P2 P 0.21669(10) 0.15276(7) 0.29608(4) 0.02487(17) Uani 1 1 d . A 1
F1 F 0.6747(5) -0.0412(3) 0.3774(2) 0.0749(12) Uani 0.8601(13) 1 d P A 1
F2 F 0.6878(6) 0.0923(3) 0.4243(3) 0.100(2) Uani 0.8601(13) 1 d P A 1
F3 F 0.5454(5) -0.0193(3) 0.45113(19) 0.0702(12) Uani 0.8601(13) 1 d P A 1
C1 C 0.0630(4) -0.0086(3) 0.33928(15) 0.0290(7) Uani 1 1 d . A 1
H1A H 0.0884 -0.0491 0.3057 0.035 Uiso 1 1 calc R A 1
H1B H -0.0283 -0.0357 0.3581 0.035 Uiso 1 1 calc R A 1
C2 C 0.0322(4) 0.0980(3) 0.31976(16) 0.0313(8) Uani 1 1 d . A 1
H2A H -0.0110 0.1354 0.3520 0.038 Uiso 1 1 calc R A 1
H2B H -0.0417 0.0987 0.2877 0.038 Uiso 1 1 calc R A 1
C4 C 0.2610(5) -0.1335(3) 0.40935(18) 0.0323(8) Uani 1 1 d . A 1
C5 C 0.3452(6) -0.1892(3) 0.3707(2) 0.0483(12) Uani 1 1 d . A 1
H5A H 0.3832 -0.1613 0.3364 0.058 Uiso 1 1 calc R A 1
C6 C 0.3735(7) -0.2879(4) 0.3829(3) 0.0623(15) Uani 1 1 d . A 1
H6A H 0.4308 -0.3259 0.3568 0.075 Uiso 1 1 calc R A 1
C7 C 0.3167(9) -0.3290(4) 0.4335(3) 0.071(2) Uani 1 1 d . A 1
H7A H 0.3366 -0.3947 0.4417 0.085 Uiso 1 1 calc R A 1
C8 C 0.2305(9) -0.2739(4) 0.4722(2) 0.0647(17) Uani 1 1 d . A 1
H8A H 0.1914 -0.3023 0.5061 0.078 Uiso 1 1 calc R A 1
C9 C 0.2029(7) -0.1767(3) 0.4601(2) 0.0459(11) Uani 1 1 d . A 1
H9A H 0.1448 -0.1392 0.4861 0.055 Uiso 1 1 calc R A 1
C10 C 0.1507(5) 0.0579(3) 0.45442(16) 0.0286(8) Uani 1 1 d . A 1
C11 C 0.2437(6) 0.1280(3) 0.48256(19) 0.0395(9) Uani 1 1 d . A 1
H11A H 0.3459 0.1367 0.4707 0.047 Uiso 1 1 calc R A 1
C12 C 0.1847(7) 0.1843(4) 0.5279(2) 0.0520(13) Uani 1 1 d . A 1
H12A H 0.2457 0.2323 0.5455 0.062 Uiso 1 1 calc R A 1
C13 C 0.0308(6) 0.1682(4) 0.5472(2) 0.0475(12) Uani 1 1 d . A 1
H13A H -0.0096 0.2049 0.5780 0.057 Uiso 1 1 calc R A 1
C14 C -0.0581(6) 0.0984(4) 0.52018(19) 0.0452(11) Uani 1 1 d . A 1
H14A H -0.1591 0.0878 0.5330 0.054 Uiso 1 1 calc R A 1
C15 C -0.0009(5) 0.0432(3) 0.47423(19) 0.0384(9) Uani 1 1 d . A 1
H15A H -0.0634 -0.0037 0.4564 0.046 Uiso 1 1 calc R A 1
C16 C 0.2246(6) 0.1232(3) 0.21878(17) 0.0379(9) Uani 1 1 d . A 1
C17 C 0.3198(6) 0.0434(4) 0.2026(2) 0.0522(12) Uani 1 1 d . A 1
H17A H 0.3818 0.0132 0.2306 0.063 Uiso 1 1 calc R A 1
C18 C 0.3215(8) 0.0099(5) 0.1457(3) 0.0725(19) Uani 1 1 d . A 1
H18A H 0.3815 -0.0441 0.1353 0.087 Uiso 1 1 calc R A 1
C19 C 0.2359(11) 0.0561(6) 0.1055(3) 0.086(3) Uani 1 1 d . A 1
H19A H 0.2393 0.0340 0.0670 0.103 Uiso 1 1 calc R A 1
C20 C 0.1400(10) 0.1372(6) 0.1192(3) 0.085(3) Uani 1 1 d . A 1
H20A H 0.0816 0.1681 0.0904 0.102 Uiso 1 1 calc R A 1
C21 C 0.1354(7) 0.1701(4) 0.1779(2) 0.0564(14) Uani 1 1 d . A 1
H21A H 0.0728 0.2228 0.1885 0.068 Uiso 1 1 calc R A 1
C22 C 0.1938(5) 0.2844(3) 0.30333(18) 0.0339(8) Uani 1 1 d . A 1
C23 C 0.1273(6) 0.3223(4) 0.3540(2) 0.0502(11) Uani 1 1 d . A 1
H23A H 0.0891 0.2799 0.3825 0.060 Uiso 1 1 calc R A 1
C24 C 0.1176(8) 0.4230(4) 0.3624(3) 0.0659(16) Uani 1 1 d . A 1
H24A H 0.0703 0.4483 0.3958 0.079 Uiso 1 1 calc R A 1
C25 C 0.1796(7) 0.4865(4) 0.3201(3) 0.0698(19) Uani 1 1 d . A 1
H25A H 0.1756 0.5541 0.3257 0.084 Uiso 1 1 calc R A 1
C26 C 0.2464(7) 0.4488(4) 0.2703(3) 0.0603(16) Uani 1 1 d . A 1
H26A H 0.2866 0.4910 0.2421 0.072 Uiso 1 1 calc R A 1
C27 C 0.2542(6) 0.3479(3) 0.2619(2) 0.0446(11) Uani 1 1 d . A 1
H27A H 0.3003 0.3229 0.2283 0.054 Uiso 1 1 calc R A 1
 
loop_
 _atom_site_aniso_label
 _atom_site_aniso_U_11
 _atom_site_aniso_U_22
 _atom_site_aniso_U_33
 _atom_site_aniso_U_23
 _atom_site_aniso_U_13
 _atom_site_aniso_U_12
I1' 0.0264(12) 0.0468(15) 0.0601(19) 0.0130(13) -0.0201(12) 0.0038(9)
I1 0.02642(14) 0.02965(15) 0.05223(19) -0.00159(14) 0.00817(12) -0.00117(11)
Pd1 0.02146(12) 0.02446(13) 0.03216(13) -0.00151(11) -0.00183(10) 0.00238(10)
P1 0.0272(4) 0.0228(4) 0.0249(4) -0.0004(3) -0.0026(3) 0.0014(3)
P2 0.0259(4) 0.0242(4) 0.0245(4) 0.0007(4) -0.0007(3) 0.0034(3)
F1 0.062(2) 0.065(3) 0.099(3) 0.010(3) -0.020(2) 0.024(2)
F2 0.101(4) 0.053(2) 0.147(5) 0.013(3) -0.091(3) -0.015(2)
F3 0.060(2) 0.087(3) 0.063(2) 0.003(2) -0.032(2) 0.023(2)
C1 0.0299(17) 0.0301(18) 0.0269(17) 0.0001(14) -0.0024(13) -0.0062(14)
C2 0.0222(15) 0.043(2) 0.0283(18) 0.0031(16) -0.0024(13) 0.0041(15)
C4 0.038(2) 0.0235(17) 0.0356(19) 0.0008(15) -0.0065(16) -0.0009(15)
C5 0.059(3) 0.030(2) 0.056(3) -0.0011(19) 0.002(2) 0.004(2)
C6 0.077(4) 0.033(3) 0.077(4) -0.010(3) -0.003(3) 0.021(3)
C7 0.108(5) 0.028(2) 0.077(4) -0.001(3) -0.041(4) 0.011(3)
C8 0.118(5) 0.031(2) 0.046(3) 0.009(2) -0.013(3) -0.008(3)
C9 0.066(3) 0.033(2) 0.038(2) 0.0004(18) 0.001(2) -0.002(2)
C10 0.0379(19) 0.0238(17) 0.0240(17) -0.0008(13) -0.0053(14) 0.0069(14)
C11 0.048(3) 0.031(2) 0.040(2) -0.0043(17) -0.0006(19) -0.0067(19)
C12 0.084(4) 0.035(2) 0.037(2) -0.0092(19) -0.009(2) -0.002(2)
C13 0.066(3) 0.041(2) 0.035(2) -0.0065(19) 0.001(2) 0.025(2)
C14 0.045(2) 0.057(3) 0.033(2) 0.004(2) 0.0052(17) 0.024(2)
C15 0.039(2) 0.044(2) 0.032(2) -0.0032(18) -0.0045(17) 0.0065(19)
C16 0.049(2) 0.039(2) 0.0262(18) -0.0042(16) 0.0015(17) -0.0160(19)
C17 0.057(3) 0.050(3) 0.050(3) -0.017(2) 0.020(2) -0.011(2)
C18 0.095(5) 0.068(4) 0.055(3) -0.025(3) 0.027(3) -0.023(3)
C19 0.132(7) 0.075(5) 0.050(3) -0.019(3) 0.026(4) -0.053(5)
C20 0.119(6) 0.095(5) 0.041(3) 0.022(3) -0.022(3) -0.060(5)
C21 0.074(4) 0.062(3) 0.034(2) 0.007(2) -0.010(2) -0.019(3)
C22 0.0364(19) 0.0283(19) 0.037(2) -0.0033(16) -0.0123(16) 0.0070(15)
C23 0.057(3) 0.043(3) 0.051(3) -0.009(2) -0.008(2) 0.015(2)
C24 0.074(4) 0.046(3) 0.077(4) -0.020(3) -0.023(3) 0.020(3)
C25 0.073(4) 0.034(3) 0.102(5) -0.011(3) -0.039(4) 0.012(3)
C26 0.059(3) 0.028(2) 0.094(4) 0.012(3) -0.022(3) -0.006(2)
C27 0.043(2) 0.031(2) 0.060(3) 0.006(2) -0.016(2) -0.0021(18)
 
_geom_special_details
;
 All esds (except the esd in the dihedral angle between two l.s. planes)
 are estimated using the full covariance matrix.  The cell esds are taken
 into account individually in the estimation of esds in distances, angles
 and torsion angles; correlations between esds in cell parameters are only
 used when they are defined by crystal symmetry.  An approximate (isotropic)
 treatment of cell esds is used for estimating esds involving l.s. planes.
;
 
loop_
 _geom_bond_atom_site_label_1
 _geom_bond_atom_site_label_2
 _geom_bond_distance
 _geom_bond_site_symmetry_2
 _geom_bond_publ_flag
I1 Pd1 2.6456(8) . ?
C3 F3 1.303(8) . ?
C3 F2 1.319(8) . ?
C3 F1 1.256(8) . ?
C3 Pd1 2.157(8) . ?
Pd1 P1 2.2551(12) . ?
Pd1 P2 2.3016(11) . ?
P1 C4 1.812(4) . ?
P1 C10 1.811(4) . ?
P1 C1 1.841(4) . ?
P2 C22 1.810(4) . ?
P2 C16 1.812(4) . ?
P2 C2 1.839(4) . ?
C1 C2 1.541(5) . ?
C4 C5 1.372(7) . ?
C4 C9 1.393(6) . ?
C5 C6 1.393(7) . ?
C6 C7 1.375(9) . ?
C7 C8 1.376(10) . ?
C8 C9 1.373(7) . ?
C10 C15 1.397(6) . ?
C10 C11 1.403(6) . ?
C11 C12 1.385(7) . ?
C12 C13 1.415(8) . ?
C13 C14 1.368(8) . ?
C14 C15 1.381(6) . ?
C16 C21 1.369(7) . ?
C16 C17 1.410(7) . ?
C17 C18 1.379(7) . ?
C18 C19 1.334(11) . ?
C19 C20 1.415(12) . ?
C20 C21 1.413(8) . ?
C22 C27 1.383(6) . ?
C22 C23 1.392(7) . ?
C23 C24 1.387(7) . ?
C24 C25 1.402(10) . ?
C25 C26 1.374(9) . ?
C26 C27 1.389(7) . ?
 
loop_
 _geom_angle_atom_site_label_1
 _geom_angle_atom_site_label_2
 _geom_angle_atom_site_label_3
 _geom_angle
 _geom_angle_site_symmetry_1
 _geom_angle_site_symmetry_3
 _geom_angle_publ_flag
F3 C3 F2 102.6(6) . . ?
F3 C3 F1 105.8(6) . . ?
F2 C3 F1 110.3(7) . . ?
F3 C3 Pd1 113.8(5) . . ?
F2 C3 Pd1 110.6(5) . . ?
F1 C3 Pd1 113.2(5) . . ?
C3 Pd1 P1 93.9(2) . . ?
C3 Pd1 P2 177.75(19) . . ?
P1 Pd1 P2 84.42(5) . . ?
C3 Pd1 I1 92.0(2) . . ?
P1 Pd1 I1 173.96(3) . . ?
P2 Pd1 I1 89.68(4) . . ?
C4 P1 C10 109.53(18) . . ?
C4 P1 C1 104.70(18) . . ?
C10 P1 C1 104.19(18) . . ?
C4 P1 Pd1 120.54(15) . . ?
C10 P1 Pd1 109.18(14) . . ?
C1 P1 Pd1 107.39(12) . . ?
C22 P2 C16 108.3(2) . . ?
C22 P2 C2 106.3(2) . . ?
C16 P2 C2 103.24(19) . . ?
C22 P2 Pd1 115.16(13) . . ?
C16 P2 Pd1 113.92(17) . . ?
C2 P2 Pd1 109.07(13) . . ?
C2 C1 P1 107.4(2) . . ?
C1 C2 P2 108.5(2) . . ?
C5 C4 C9 119.5(4) . . ?
C5 C4 P1 117.9(3) . . ?
C9 C4 P1 122.6(3) . . ?
C4 C5 C6 119.8(5) . . ?
C7 C6 C5 119.9(5) . . ?
C6 C7 C8 120.7(5) . . ?
C9 C8 C7 119.4(6) . . ?
C8 C9 C4 120.8(5) . . ?
C15 C10 C11 118.9(4) . . ?
C15 C10 P1 122.0(3) . . ?
C11 C10 P1 119.0(3) . . ?
C12 C11 C10 120.6(5) . . ?
C11 C12 C13 119.4(5) . . ?
C14 C13 C12 119.5(4) . . ?
C13 C14 C15 121.3(5) . . ?
C14 C15 C10 120.2(4) . . ?
C21 C16 C17 120.6(4) . . ?
C21 C16 P2 122.7(4) . . ?
C17 C16 P2 116.6(4) . . ?
C18 C17 C16 120.5(6) . . ?
C19 C18 C17 119.1(7) . . ?
C18 C19 C20 122.6(6) . . ?
C19 C20 C21 118.3(7) . . ?
C16 C21 C20 118.9(6) . . ?
C27 C22 C23 119.5(4) . . ?
C27 C22 P2 121.0(3) . . ?
C23 C22 P2 119.2(4) . . ?
C24 C23 C22 120.4(6) . . ?
C23 C24 C25 119.4(6) . . ?
C26 C25 C24 120.0(5) . . ?
C25 C26 C27 120.2(6) . . ?
C22 C27 C26 120.4(5) . . ?
 
loop_
 _geom_torsion_atom_site_label_1
 _geom_torsion_atom_site_label_2
 _geom_torsion_atom_site_label_3
 _geom_torsion_atom_site_label_4
 _geom_torsion
 _geom_torsion_site_symmetry_1
 _geom_torsion_site_symmetry_2
 _geom_torsion_site_symmetry_3
 _geom_torsion_site_symmetry_4
 _geom_torsion_publ_flag
F3 C3 Pd1 P1 -19.7(5) . . . . ?
F2 C3 Pd1 P1 -134.6(5) . . . . ?
F1 C3 Pd1 P1 101.1(5) . . . . ?
F3 C3 Pd1 P2 21(5) . . . . ?
F2 C3 Pd1 P2 -94(5) . . . . ?
F1 C3 Pd1 P2 142(5) . . . . ?
F3 C3 Pd1 I1 158.8(5) . . . . ?
F2 C3 Pd1 I1 43.9(5) . . . . ?
F1 C3 Pd1 I1 -80.4(5) . . . . ?
C3 Pd1 P1 C4 -39.5(2) . . . . ?
P2 Pd1 P1 C4 141.98(15) . . . . ?
I1 Pd1 P1 C4 154.6(3) . . . . ?
C3 Pd1 P1 C10 88.5(2) . . . . ?
P2 Pd1 P1 C10 -89.98(13) . . . . ?
I1 Pd1 P1 C10 -77.4(3) . . . . ?
C3 Pd1 P1 C1 -159.1(2) . . . . ?
P2 Pd1 P1 C1 22.40(13) . . . . ?
I1 Pd1 P1 C1 35.0(3) . . . . ?
C3 Pd1 P2 C22 81(5) . . . . ?
P1 Pd1 P2 C22 121.57(17) . . . . ?
I1 Pd1 P2 C22 -57.11(16) . . . . ?
C3 Pd1 P2 C16 -153(5) . . . . ?
P1 Pd1 P2 C16 -112.50(16) . . . . ?
I1 Pd1 P2 C16 68.82(15) . . . . ?
C3 Pd1 P2 C2 -38(5) . . . . ?
P1 Pd1 P2 C2 2.23(14) . . . . ?
I1 Pd1 P2 C2 -176.45(14) . . . . ?
C4 P1 C1 C2 -177.6(3) . . . . ?
C10 P1 C1 C2 67.4(3) . . . . ?
Pd1 P1 C1 C2 -48.4(3) . . . . ?
P1 C1 C2 P2 50.3(3) . . . . ?
C22 P2 C2 C1 -156.6(3) . . . . ?
C16 P2 C2 C1 89.6(3) . . . . ?
Pd1 P2 C2 C1 -31.9(3) . . . . ?
C10 P1 C4 C5 -168.0(4) . . . . ?
C1 P1 C4 C5 80.8(4) . . . . ?
Pd1 P1 C4 C5 -40.1(4) . . . . ?
C10 P1 C4 C9 13.2(4) . . . . ?
C1 P1 C4 C9 -98.0(4) . . . . ?
Pd1 P1 C4 C9 141.1(4) . . . . ?
C9 C4 C5 C6 -0.9(8) . . . . ?
P1 C4 C5 C6 -179.7(4) . . . . ?
C4 C5 C6 C7 0.2(9) . . . . ?
C5 C6 C7 C8 0.6(10) . . . . ?
C6 C7 C8 C9 -0.7(10) . . . . ?
C7 C8 C9 C4 0.0(9) . . . . ?
C5 C4 C9 C8 0.8(8) . . . . ?
P1 C4 C9 C8 179.5(5) . . . . ?
C4 P1 C10 C15 -72.9(4) . . . . ?
C1 P1 C10 C15 38.7(4) . . . . ?
Pd1 P1 C10 C15 153.2(3) . . . . ?
C4 P1 C10 C11 110.7(3) . . . . ?
C1 P1 C10 C11 -137.7(3) . . . . ?
Pd1 P1 C10 C11 -23.3(4) . . . . ?
C15 C10 C11 C12 -2.3(6) . . . . ?
P1 C10 C11 C12 174.3(4) . . . . ?
C10 C11 C12 C13 2.3(7) . . . . ?
C11 C12 C13 C14 -1.0(7) . . . . ?
C12 C13 C14 C15 -0.2(7) . . . . ?
C13 C14 C15 C10 0.2(7) . . . . ?
C11 C10 C15 C14 1.1(6) . . . . ?
P1 C10 C15 C14 -175.4(3) . . . . ?
C22 P2 C16 C21 -37.9(5) . . . . ?
C2 P2 C16 C21 74.4(4) . . . . ?
Pd1 P2 C16 C21 -167.4(4) . . . . ?
C22 P2 C16 C17 146.7(3) . . . . ?
C2 P2 C16 C17 -101.0(4) . . . . ?
Pd1 P2 C16 C17 17.2(4) . . . . ?
C21 C16 C17 C18 -1.6(8) . . . . ?
P2 C16 C17 C18 173.9(4) . . . . ?
C16 C17 C18 C19 2.2(9) . . . . ?
C17 C18 C19 C20 -1.4(10) . . . . ?
C18 C19 C20 C21 -0.1(10) . . . . ?
C17 C16 C21 C20 0.1(8) . . . . ?
P2 C16 C21 C20 -175.1(4) . . . . ?
C19 C20 C21 C16 0.7(9) . . . . ?
C16 P2 C22 C27 -30.3(4) . . . . ?
C2 P2 C22 C27 -140.7(3) . . . . ?
Pd1 P2 C22 C27 98.5(3) . . . . ?
C16 P2 C22 C23 155.8(4) . . . . ?
C2 P2 C22 C23 45.4(4) . . . . ?
Pd1 P2 C22 C23 -75.4(4) . . . . ?
C27 C22 C23 C24 1.8(7) . . . . ?
P2 C22 C23 C24 175.8(4) . . . . ?
C22 C23 C24 C25 -1.9(8) . . . . ?
C23 C24 C25 C26 1.3(9) . . . . ?
C24 C25 C26 C27 -0.6(9) . . . . ?
C23 C22 C27 C26 -1.1(7) . . . . ?
P2 C22 C27 C26 -174.9(4) . . . . ?
C25 C26 C27 C22 0.5(8) . . . . ?
 
_diffrn_measured_fraction_theta_max    0.994
_diffrn_reflns_theta_full              28.32
_diffrn_measured_fraction_theta_full   0.994
_refine_diff_density_max    1.015
_refine_diff_density_min   -0.574
_refine_diff_density_rms    0.090
#===END

data_04312
 
_audit_creation_method            SHELXL-97
_chemical_name_systematic
;
 ?
;
_chemical_name_common             ?
_chemical_melting_point           ?
_chemical_formula_moiety          ?
_chemical_formula_sum
 'C13 H21 F3 N2 Pd'
_chemical_formula_weight          368.72
 
loop_
 _atom_type_symbol
 _atom_type_description
 _atom_type_scat_dispersion_real
 _atom_type_scat_dispersion_imag
 _atom_type_scat_source
 'C'  'C'   0.0033   0.0016
 'International Tables Vol C Tables 4.2.6.8 and 6.1.1.4'
 'H'  'H'   0.0000   0.0000
 'International Tables Vol C Tables 4.2.6.8 and 6.1.1.4'
 'N'  'N'   0.0061   0.0033
 'International Tables Vol C Tables 4.2.6.8 and 6.1.1.4'
 'F'  'F'   0.0171   0.0103
 'International Tables Vol C Tables 4.2.6.8 and 6.1.1.4'
 'Pd'  'Pd'  -0.9988   1.0072
 'International Tables Vol C Tables 4.2.6.8 and 6.1.1.4'
 
_symmetry_cell_setting            Monoclinic
_symmetry_space_group_name_H-M    P2(1)/n
 
loop_
 _symmetry_equiv_pos_as_xyz
 'x, y, z'
 '-x+1/2, y+1/2, -z+1/2'
 '-x, -y, -z'
 'x-1/2, -y-1/2, z-1/2'
 
_cell_length_a                    8.361(3)
_cell_length_b                    16.466(6)
_cell_length_c                    11.389(4)
_cell_angle_alpha                 90.00
_cell_angle_beta                  110.163(5)
_cell_angle_gamma                 90.00
_cell_volume                      1471.8(9)
_cell_formula_units_Z             4
_cell_measurement_temperature     293(2)
_cell_measurement_reflns_used     ?
_cell_measurement_theta_min       ?
_cell_measurement_theta_max       ?
 
_exptl_crystal_description        iregblok
_exptl_crystal_colour             colourless
_exptl_crystal_size_min           0.190
_exptl_crystal_size_mid           0.280
_exptl_crystal_size_max           0.280
_exptl_crystal_density_meas       ?
_exptl_crystal_density_diffrn     1.664
_exptl_crystal_density_method     'not measured'
_exptl_crystal_F_000              744
_exptl_absorpt_coefficient_mu     1.282
_exptl_absorpt_correction_type    none
_exptl_absorpt_correction_T_min   ?
_exptl_absorpt_correction_T_max   ?
_exptl_absorpt_process_details    ?
 
_exptl_special_details
;
 ?
;
 
_diffrn_ambient_temperature       293(2)
_diffrn_radiation_wavelength      0.71073
_diffrn_radiation_type            MoK\a
_diffrn_radiation_source          'fine-focus sealed tube'
_diffrn_radiation_monochromator   graphite
_diffrn_measurement_device_type   'Bruker P4'
_diffrn_measurement_method        '\w scans'
_diffrn_detector_area_resol_mean  ?
_diffrn_standards_number          ?
_diffrn_standards_interval_count  ?
_diffrn_standards_interval_time   ?
_diffrn_standards_decay_%         ?
_diffrn_reflns_number             27438
_diffrn_reflns_av_R_equivalents   0.0278
_diffrn_reflns_av_sigmaI/netI     0.0153
_diffrn_reflns_limit_h_min        -11
_diffrn_reflns_limit_h_max        11
_diffrn_reflns_limit_k_min        -22
_diffrn_reflns_limit_k_max        22
_diffrn_reflns_limit_l_min        -15
_diffrn_reflns_limit_l_max        15
_diffrn_reflns_theta_min          2.27
_diffrn_reflns_theta_max          29.22
_reflns_number_total              3973
_reflns_number_gt                 3795
_reflns_threshold_expression      >2sigma(I)
 
_computing_data_collection        'Bruker XSCANS'
_computing_cell_refinement        'Bruker XSCANS'
_computing_data_reduction         'Bruker SHELXTL'
_computing_structure_solution     'SHELXS-97 (Sheldrick, 1990)'
_computing_structure_refinement   'SHELXL-97 (Sheldrick, 1997)'
_computing_molecular_graphics     'Bruker SHELXTL'
_computing_publication_material   'Bruker SHELXTL'
 
_refine_special_details
;
 Refinement of F^2^ against ALL reflections.  The weighted R-factor wR and
 goodness of fit S are based on F^2^, conventional R-factors R are based
 on F, with F set to zero for negative F^2^. The threshold expression of
 F^2^ > 2sigma(F^2^) is used only for calculating R-factors(gt) etc. and is
 not relevant to the choice of reflections for refinement.  R-factors based
 on F^2^ are statistically about twice as large as those based on F, and R-
 factors based on ALL data will be even larger.
;
 
_refine_ls_structure_factor_coef  Fsqd
_refine_ls_matrix_type            full
_refine_ls_weighting_scheme       calc
_refine_ls_weighting_details
 'calc w=1/[\s^2^(Fo^2^)+(0.0221P)^2^+0.7210P] where P=(Fo^2^+2Fc^2^)/3'
_atom_sites_solution_primary      direct
_atom_sites_solution_secondary    difmap
_atom_sites_solution_hydrogens    geom
_refine_ls_hydrogen_treatment     riding
_refine_ls_extinction_method      none
_refine_ls_extinction_coef        ?
_refine_ls_number_reflns          3973
_refine_ls_number_parameters      176
_refine_ls_number_restraints      0
_refine_ls_R_factor_all           0.0193
_refine_ls_R_factor_gt            0.0183
_refine_ls_wR_factor_ref          0.0473
_refine_ls_wR_factor_gt           0.0467
_refine_ls_goodness_of_fit_ref    1.068
_refine_ls_restrained_S_all       1.068
_refine_ls_shift/su_max           0.001
_refine_ls_shift/su_mean          0.000
 
loop_
 _atom_site_label
 _atom_site_type_symbol
 _atom_site_fract_x
 _atom_site_fract_y
 _atom_site_fract_z
 _atom_site_U_iso_or_equiv
 _atom_site_adp_type
 _atom_site_occupancy
 _atom_site_symmetry_multiplicity
 _atom_site_calc_flag
 _atom_site_refinement_flags
 _atom_site_disorder_assembly
 _atom_site_disorder_group
Pd1 Pd 0.887091(11) 0.204192(6) 0.322635(9) 0.01832(4) Uani 1 1 d . . .
N1 N 0.70374(14) 0.11111(8) 0.33259(12) 0.0253(2) Uani 1 1 d . . .
F1 F 1.14629(12) 0.14683(6) 0.22906(9) 0.0346(2) Uani 1 1 d . . .
C1 C 0.5747(2) 0.15658(12) 0.3696(2) 0.0441(4) Uani 1 1 d . . .
H1A H 0.6189 0.1666 0.4590 0.053 Uiso 1 1 calc R . .
H1B H 0.4724 0.1239 0.3513 0.053 Uiso 1 1 calc R . .
N2 N 0.68488(15) 0.28623(7) 0.32430(12) 0.0242(2) Uani 1 1 d . . .
F2 F 1.21012(12) 0.12538(6) 0.42623(9) 0.0385(2) Uani 1 1 d . . .
C2 C 0.5306(2) 0.23563(11) 0.3020(2) 0.0405(4) Uani 1 1 d . . .
H2A H 0.4774 0.2256 0.2130 0.049 Uiso 1 1 calc R . .
H2B H 0.4496 0.2646 0.3304 0.049 Uiso 1 1 calc R . .
F3 F 1.02717(13) 0.05000(6) 0.29263(11) 0.0422(2) Uani 1 1 d . . .
C3 C 0.7738(2) 0.04823(10) 0.42957(15) 0.0315(3) Uani 1 1 d . . .
H3A H 0.6831 0.0138 0.4337 0.047 Uiso 1 1 calc R . .
H3B H 0.8275 0.0739 0.5092 0.047 Uiso 1 1 calc R . .
H3C H 0.8561 0.0162 0.4088 0.047 Uiso 1 1 calc R . .
C4 C 0.6260(2) 0.06971(12) 0.21152(16) 0.0411(4) Uani 1 1 d . . .
H4A H 0.5400 0.0327 0.2168 0.062 Uiso 1 1 calc R . .
H4B H 0.7121 0.0402 0.1913 0.062 Uiso 1 1 calc R . .
H4C H 0.5753 0.1093 0.1476 0.062 Uiso 1 1 calc R . .
C5 C 0.7304(2) 0.32940(15) 0.44457(18) 0.0484(5) Uani 1 1 d . . .
H5A H 0.6377 0.3638 0.4444 0.073 Uiso 1 1 calc R . .
H5B H 0.8301 0.3619 0.4564 0.073 Uiso 1 1 calc R . .
H5C H 0.7532 0.2907 0.5113 0.073 Uiso 1 1 calc R . .
C6 C 0.6438(2) 0.34876(11) 0.22452(18) 0.0386(4) Uani 1 1 d . . .
H6A H 0.5511 0.3817 0.2285 0.058 Uiso 1 1 calc R . .
H6B H 0.6119 0.3227 0.1443 0.058 Uiso 1 1 calc R . .
H6C H 0.7419 0.3824 0.2361 0.058 Uiso 1 1 calc R . .
C7 C 1.07352(17) 0.13050(9) 0.31721(13) 0.0239(3) Uani 1 1 d . . .
C8 C 1.04951(18) 0.29387(8) 0.32649(14) 0.0216(3) Uani 1 1 d . . .
C9 C 1.04563(19) 0.33667(10) 0.21913(14) 0.0278(3) Uani 1 1 d . . .
H9A H 0.9707 0.3204 0.1414 0.033 Uiso 1 1 calc R . .
C10 C 1.1520(2) 0.40306(10) 0.22683(16) 0.0311(3) Uani 1 1 d . . .
H10A H 1.1463 0.4309 0.1545 0.037 Uiso 1 1 calc R . .
C11 C 1.2660(2) 0.42805(9) 0.34107(17) 0.0327(3) Uani 1 1 d . . .
H11A H 1.3358 0.4728 0.3459 0.039 Uiso 1 1 calc R . .
C12 C 1.27474(19) 0.38565(10) 0.44784(15) 0.0311(3) Uani 1 1 d . . .
H12A H 1.3516 0.4016 0.5250 0.037 Uiso 1 1 calc R . .
C13 C 1.16885(18) 0.31910(9) 0.44015(14) 0.0255(3) Uani 1 1 d . . .
H13A H 1.1778 0.2906 0.5127 0.031 Uiso 1 1 calc R . .
 
loop_
 _atom_site_aniso_label
 _atom_site_aniso_U_11
 _atom_site_aniso_U_22
 _atom_site_aniso_U_33
 _atom_site_aniso_U_23
 _atom_site_aniso_U_13
 _atom_site_aniso_U_12
Pd1 0.01479(6) 0.01998(6) 0.02090(6) 0.00141(3) 0.00706(4) 0.00101(3)
N1 0.0182(5) 0.0253(6) 0.0322(6) 0.0065(5) 0.0082(4) 0.0000(4)
F1 0.0338(5) 0.0401(5) 0.0389(5) 0.0021(4) 0.0241(4) 0.0061(4)
C1 0.0283(8) 0.0431(10) 0.0710(13) 0.0161(9) 0.0300(8) 0.0069(7)
N2 0.0196(5) 0.0272(6) 0.0253(6) 0.0004(4) 0.0073(4) 0.0037(4)
F2 0.0282(4) 0.0474(6) 0.0346(5) 0.0035(4) 0.0042(4) 0.0162(4)
C2 0.0214(7) 0.0391(9) 0.0613(11) 0.0091(8) 0.0147(7) 0.0047(6)
F3 0.0399(5) 0.0242(5) 0.0729(7) -0.0091(5) 0.0327(5) -0.0017(4)
C3 0.0298(7) 0.0338(8) 0.0309(7) 0.0087(6) 0.0104(6) -0.0001(6)
C4 0.0382(9) 0.0431(10) 0.0327(8) 0.0072(7) 0.0002(6) -0.0175(7)
C5 0.0334(8) 0.0705(14) 0.0361(9) -0.0204(9) 0.0052(7) 0.0162(9)
C6 0.0388(8) 0.0339(8) 0.0461(10) 0.0125(7) 0.0185(7) 0.0163(7)
C7 0.0206(6) 0.0244(6) 0.0287(7) 0.0005(5) 0.0110(5) 0.0019(5)
C8 0.0200(6) 0.0208(6) 0.0264(7) 0.0007(5) 0.0112(5) 0.0008(4)
C9 0.0274(7) 0.0317(7) 0.0264(7) 0.0040(6) 0.0120(5) 0.0029(5)
C10 0.0357(8) 0.0281(7) 0.0378(8) 0.0101(6) 0.0230(6) 0.0055(6)
C11 0.0311(7) 0.0236(7) 0.0523(10) -0.0001(6) 0.0258(7) -0.0025(5)
C12 0.0266(7) 0.0320(8) 0.0366(8) -0.0068(6) 0.0135(6) -0.0066(6)
C13 0.0258(6) 0.0273(7) 0.0254(7) 0.0015(5) 0.0115(5) -0.0023(5)
 
_geom_special_details
;
 All esds (except the esd in the dihedral angle between two l.s. planes)
 are estimated using the full covariance matrix.  The cell esds are taken
 into account individually in the estimation of esds in distances, angles
 and torsion angles; correlations between esds in cell parameters are only
 used when they are defined by crystal symmetry.  An approximate (isotropic)
 treatment of cell esds is used for estimating esds involving l.s. planes.
;
 
loop_
 _geom_bond_atom_site_label_1
 _geom_bond_atom_site_label_2
 _geom_bond_distance
 _geom_bond_site_symmetry_2
 _geom_bond_publ_flag
Pd1 C7 1.9930(14) . ?
Pd1 C8 1.9964(14) . ?
Pd1 N2 2.1692(13) . ?
Pd1 N1 2.1981(13) . ?
N1 C4 1.473(2) . ?
N1 C3 1.4795(19) . ?
N1 C1 1.489(2) . ?
F1 C7 1.3680(16) . ?
C1 C2 1.492(3) . ?
N2 C5 1.472(2) . ?
N2 C2 1.482(2) . ?
N2 C6 1.483(2) . ?
F2 C7 1.3695(17) . ?
F3 C7 1.3822(17) . ?
C8 C13 1.398(2) . ?
C8 C9 1.402(2) . ?
C9 C10 1.393(2) . ?
C10 C11 1.384(2) . ?
C11 C12 1.382(2) . ?
C12 C13 1.392(2) . ?
 
loop_
 _geom_angle_atom_site_label_1
 _geom_angle_atom_site_label_2
 _geom_angle_atom_site_label_3
 _geom_angle
 _geom_angle_site_symmetry_1
 _geom_angle_site_symmetry_3
 _geom_angle_publ_flag
C7 Pd1 C8 85.28(6) . . ?
C7 Pd1 N2 178.44(5) . . ?
C8 Pd1 N2 93.76(6) . . ?
C7 Pd1 N1 98.27(6) . . ?
C8 Pd1 N1 174.75(5) . . ?
N2 Pd1 N1 82.77(5) . . ?
C4 N1 C3 107.96(13) . . ?
C4 N1 C1 111.64(14) . . ?
C3 N1 C1 106.23(13) . . ?
C4 N1 Pd1 111.39(10) . . ?
C3 N1 Pd1 115.01(9) . . ?
C1 N1 Pd1 104.51(10) . . ?
N1 C1 C2 111.51(14) . . ?
C5 N2 C2 111.19(15) . . ?
C5 N2 C6 107.16(15) . . ?
C2 N2 C6 107.52(13) . . ?
C5 N2 Pd1 110.88(10) . . ?
C2 N2 Pd1 106.46(10) . . ?
C6 N2 Pd1 113.63(10) . . ?
N2 C2 C1 110.88(14) . . ?
F1 C7 F2 103.56(11) . . ?
F1 C7 F3 101.79(11) . . ?
F2 C7 F3 102.27(11) . . ?
F1 C7 Pd1 116.97(10) . . ?
F2 C7 Pd1 115.22(10) . . ?
F3 C7 Pd1 114.99(9) . . ?
C13 C8 C9 116.93(13) . . ?
C13 C8 Pd1 120.22(10) . . ?
C9 C8 Pd1 122.79(11) . . ?
C10 C9 C8 121.15(14) . . ?
C11 C10 C9 120.69(14) . . ?
C12 C11 C10 119.17(14) . . ?
C11 C12 C13 120.16(15) . . ?
C12 C13 C8 121.85(14) . . ?
 
loop_
 _geom_torsion_atom_site_label_1
 _geom_torsion_atom_site_label_2
 _geom_torsion_atom_site_label_3
 _geom_torsion_atom_site_label_4
 _geom_torsion
 _geom_torsion_site_symmetry_1
 _geom_torsion_site_symmetry_2
 _geom_torsion_site_symmetry_3
 _geom_torsion_site_symmetry_4
 _geom_torsion_publ_flag
C7 Pd1 N1 C4 -73.23(12) . . . . ?
C8 Pd1 N1 C4 154.4(5) . . . . ?
N2 Pd1 N1 C4 105.61(11) . . . . ?
C7 Pd1 N1 C3 50.01(11) . . . . ?
C8 Pd1 N1 C3 -82.3(6) . . . . ?
N2 Pd1 N1 C3 -131.15(11) . . . . ?
C7 Pd1 N1 C1 166.08(11) . . . . ?
C8 Pd1 N1 C1 33.7(6) . . . . ?
N2 Pd1 N1 C1 -15.08(11) . . . . ?
C4 N1 C1 C2 -78.98(19) . . . . ?
C3 N1 C1 C2 163.57(16) . . . . ?
Pd1 N1 C1 C2 41.55(18) . . . . ?
C7 Pd1 N2 C5 -119.1(19) . . . . ?
C8 Pd1 N2 C5 -67.50(14) . . . . ?
N1 Pd1 N2 C5 108.54(13) . . . . ?
C7 Pd1 N2 C2 119.8(19) . . . . ?
C8 Pd1 N2 C2 171.42(11) . . . . ?
N1 Pd1 N2 C2 -12.53(11) . . . . ?
C7 Pd1 N2 C6 2(2) . . . . ?
C8 Pd1 N2 C6 53.27(12) . . . . ?
N1 Pd1 N2 C6 -130.69(12) . . . . ?
C5 N2 C2 C1 -81.65(19) . . . . ?
C6 N2 C2 C1 161.33(16) . . . . ?
Pd1 N2 C2 C1 39.22(18) . . . . ?
N1 C1 C2 N2 -57.1(2) . . . . ?
C8 Pd1 C7 F1 -50.65(11) . . . . ?
N2 Pd1 C7 F1 1(2) . . . . ?
N1 Pd1 C7 F1 133.24(10) . . . . ?
C8 Pd1 C7 F2 71.39(11) . . . . ?
N2 Pd1 C7 F2 123.1(19) . . . . ?
N1 Pd1 C7 F2 -104.72(10) . . . . ?
C8 Pd1 C7 F3 -170.01(11) . . . . ?
N2 Pd1 C7 F3 -118.3(19) . . . . ?
N1 Pd1 C7 F3 13.88(11) . . . . ?
C7 Pd1 C8 C13 -85.66(12) . . . . ?
N2 Pd1 C8 C13 95.56(11) . . . . ?
N1 Pd1 C8 C13 47.1(6) . . . . ?
C7 Pd1 C8 C9 97.33(12) . . . . ?
N2 Pd1 C8 C9 -81.45(12) . . . . ?
N1 Pd1 C8 C9 -129.9(5) . . . . ?
C13 C8 C9 C10 -2.3(2) . . . . ?
Pd1 C8 C9 C10 174.83(11) . . . . ?
C8 C9 C10 C11 0.7(2) . . . . ?
C9 C10 C11 C12 0.8(2) . . . . ?
C10 C11 C12 C13 -0.6(2) . . . . ?
C11 C12 C13 C8 -1.1(2) . . . . ?
C9 C8 C13 C12 2.5(2) . . . . ?
Pd1 C8 C13 C12 -174.68(11) . . . . ?
 
_diffrn_measured_fraction_theta_max    0.994
_diffrn_reflns_theta_full              29.22
_diffrn_measured_fraction_theta_full   0.994
_refine_diff_density_max    0.715
_refine_diff_density_min   -0.523
_refine_diff_density_rms    0.064
#===END

data_04320
 
_audit_creation_method            SHELXL-97
_chemical_name_systematic
;
 ?
;
_chemical_name_common             ?
_chemical_melting_point           ?
_chemical_formula_moiety          ?
_chemical_formula_sum
 'C12 H24 F6 N2 Pd'
_chemical_formula_weight          416.73
 
loop_
 _atom_type_symbol
 _atom_type_description
 _atom_type_scat_dispersion_real
 _atom_type_scat_dispersion_imag
 _atom_type_scat_source
 'C'  'C'   0.0033   0.0016
 'International Tables Vol C Tables 4.2.6.8 and 6.1.1.4'
 'H'  'H'   0.0000   0.0000
 'International Tables Vol C Tables 4.2.6.8 and 6.1.1.4'
 'F'  'F'   0.0171   0.0103
 'International Tables Vol C Tables 4.2.6.8 and 6.1.1.4'
 'N'  'N'   0.0061   0.0033
 'International Tables Vol C Tables 4.2.6.8 and 6.1.1.4'
 'Pd'  'Pd'  -0.9988   1.0072
 'International Tables Vol C Tables 4.2.6.8 and 6.1.1.4'
 
_symmetry_cell_setting            Monoclinic
_symmetry_space_group_name_H-M    Cc
 
loop_
 _symmetry_equiv_pos_as_xyz
 'x, y, z'
 '-x, y, -z+1/2'
 'x+1/2, y+1/2, z'
 '-x+1/2, y+1/2, -z+1/2'
 '-x, -y, -z'
 'x, -y, z-1/2'
 '-x+1/2, -y+1/2, -z'
 'x+1/2, -y+1/2, z-1/2'
 
_cell_length_a                    15.702(5)
_cell_length_b                    8.550(3)
_cell_length_c                    11.809(3)
_cell_angle_alpha                 90.00
_cell_angle_beta                  94.882(5)
_cell_angle_gamma                 90.00
_cell_volume                      1579.6(8)
_cell_formula_units_Z             4
_cell_measurement_temperature     293(2)
_cell_measurement_reflns_used     ?
_cell_measurement_theta_min       ?
_cell_measurement_theta_max       ?
 
_exptl_crystal_description        prism
_exptl_crystal_colour             colourless
_exptl_crystal_size_min           0.160
_exptl_crystal_size_mid           0.180
_exptl_crystal_size_max           0.180
_exptl_crystal_density_meas       ?
_exptl_crystal_density_diffrn     1.752
_exptl_crystal_density_method     'not measured'
_exptl_crystal_F_000              840
_exptl_absorpt_coefficient_mu     1.231
_exptl_absorpt_correction_type    none
_exptl_absorpt_correction_T_min   ?
_exptl_absorpt_correction_T_max   ?
_exptl_absorpt_process_details    ?
 
_exptl_special_details
;
 ?
;
 
_diffrn_ambient_temperature       293(2)
_diffrn_radiation_wavelength      0.71073
_diffrn_radiation_type            MoK\a
_diffrn_radiation_source          'fine-focus sealed tube'
_diffrn_radiation_monochromator   graphite
_diffrn_measurement_device_type   'Bruker P4'
_diffrn_measurement_method        '\w scans'
_diffrn_detector_area_resol_mean  ?
_diffrn_standards_number          ?
_diffrn_standards_interval_count  ?
_diffrn_standards_interval_time   ?
_diffrn_standards_decay_%         ?
_diffrn_reflns_number             13683
_diffrn_reflns_av_R_equivalents   0.0299
_diffrn_reflns_av_sigmaI/netI     0.0162
_diffrn_reflns_limit_h_min        -20
_diffrn_reflns_limit_h_max        20
_diffrn_reflns_limit_k_min        -11
_diffrn_reflns_limit_k_max        11
_diffrn_reflns_limit_l_min        -15
_diffrn_reflns_limit_l_max        15
_diffrn_reflns_theta_min          2.60
_diffrn_reflns_theta_max          28.31
_reflns_number_total              1952
_reflns_number_gt                 1917
_reflns_threshold_expression      >2sigma(I)
 
_computing_data_collection        'Bruker XSCANS'
_computing_cell_refinement        'Bruker XSCANS'
_computing_data_reduction         'Bruker SHELXTL'
_computing_structure_solution     'SHELXS-97 (Sheldrick, 1990)'
_computing_structure_refinement   'SHELXL-97 (Sheldrick, 1997)'
_computing_molecular_graphics     'Bruker SHELXTL'
_computing_publication_material   'Bruker SHELXTL'
 
_refine_special_details
;
 Refinement of F^2^ against ALL reflections.  The weighted R-factor wR and
 goodness of fit S are based on F^2^, conventional R-factors R are based
 on F, with F set to zero for negative F^2^. The threshold expression of
 F^2^ > 2sigma(F^2^) is used only for calculating R-factors(gt) etc. and is
 not relevant to the choice of reflections for refinement.  R-factors based
 on F^2^ are statistically about twice as large as those based on F, and R-
 factors based on ALL data will be even larger.
;
 
_refine_ls_structure_factor_coef  Fsqd
_refine_ls_matrix_type            full
_refine_ls_weighting_scheme       calc
_refine_ls_weighting_details
 'calc w=1/[\s^2^(Fo^2^)+(0.0190P)^2^+0.6697P] where P=(Fo^2^+2Fc^2^)/3'
_atom_sites_solution_primary      direct
_atom_sites_solution_secondary    difmap
_atom_sites_solution_hydrogens    geom
_refine_ls_hydrogen_treatment     riding
_refine_ls_extinction_method      none
_refine_ls_extinction_coef        ?
_refine_ls_number_reflns          1952
_refine_ls_number_parameters      98
_refine_ls_number_restraints      0
_refine_ls_R_factor_all           0.0140
_refine_ls_R_factor_gt            0.0138
_refine_ls_wR_factor_ref          0.0355
_refine_ls_wR_factor_gt           0.0354
_refine_ls_goodness_of_fit_ref    1.066
_refine_ls_restrained_S_all       1.066
_refine_ls_shift/su_max           0.000
_refine_ls_shift/su_mean          0.000
 
loop_
 _atom_site_label
 _atom_site_type_symbol
 _atom_site_fract_x
 _atom_site_fract_y
 _atom_site_fract_z
 _atom_site_U_iso_or_equiv
 _atom_site_adp_type
 _atom_site_occupancy
 _atom_site_symmetry_multiplicity
 _atom_site_calc_flag
 _atom_site_refinement_flags
 _atom_site_disorder_assembly
 _atom_site_disorder_group
Pd1 Pd 0.5000 0.446203(11) 0.2500 0.01569(5) Uani 1 2 d S . .
F1 F 0.45116(6) 0.73679(9) 0.13933(8) 0.0418(2) Uani 1 1 d . . .
N1 N 0.41178(6) 0.25418(11) 0.20125(7) 0.01927(18) Uani 1 1 d . . .
C1 C 0.45267(7) 0.11259(13) 0.25551(10) 0.0238(2) Uani 1 1 d . . .
H1A H 0.4274 0.0196 0.2197 0.029 Uiso 1 1 calc R . .
H1B H 0.4423 0.1102 0.3353 0.029 Uiso 1 1 calc R . .
F2 F 0.34815(6) 0.57264(9) 0.12982(8) 0.0404(2) Uani 1 1 d . . .
C2 C 0.32327(7) 0.26572(16) 0.23921(10) 0.0283(2) Uani 1 1 d . . .
H2A H 0.2964 0.1636 0.2323 0.034 Uiso 1 1 calc R . .
H2B H 0.2900 0.3368 0.1890 0.034 Uiso 1 1 calc R . .
F3 F 0.38153(5) 0.69422(10) 0.28526(7) 0.03961(19) Uani 1 1 d . . .
C3 C 0.32124(9) 0.32266(17) 0.36088(11) 0.0333(3) Uani 1 1 d . . .
H3A H 0.2630 0.3320 0.3789 0.050 Uiso 1 1 calc R . .
H3B H 0.3488 0.4228 0.3689 0.050 Uiso 1 1 calc R . .
H3C H 0.3507 0.2491 0.4117 0.050 Uiso 1 1 calc R . .
C4 C 0.40726(8) 0.24160(14) 0.07364(9) 0.0242(2) Uani 1 1 d . . .
H4A H 0.4652 0.2384 0.0510 0.029 Uiso 1 1 calc R . .
H4B H 0.3808 0.3360 0.0417 0.029 Uiso 1 1 calc R . .
C5 C 0.35876(11) 0.10137(17) 0.02058(11) 0.0382(3) Uani 1 1 d . . .
H5A H 0.3584 0.1067 -0.0607 0.057 Uiso 1 1 calc R . .
H5B H 0.3010 0.1027 0.0417 0.057 Uiso 1 1 calc R . .
H5C H 0.3863 0.0065 0.0474 0.057 Uiso 1 1 calc R . .
C6 C 0.41754(8) 0.61954(14) 0.19927(10) 0.0251(2) Uani 1 1 d . . .
 
loop_
 _atom_site_aniso_label
 _atom_site_aniso_U_11
 _atom_site_aniso_U_22
 _atom_site_aniso_U_33
 _atom_site_aniso_U_23
 _atom_site_aniso_U_13
 _atom_site_aniso_U_12
Pd1 0.01628(7) 0.01320(7) 0.01768(6) 0.000 0.00207(4) 0.000
F1 0.0481(5) 0.0273(4) 0.0511(5) 0.0181(4) 0.0093(4) 0.0084(3)
N1 0.0188(4) 0.0199(4) 0.0191(4) -0.0005(3) 0.0018(3) -0.0019(3)
C1 0.0296(6) 0.0172(5) 0.0242(5) 0.0017(4) 0.0004(4) -0.0047(4)
F2 0.0381(5) 0.0330(4) 0.0470(5) -0.0023(3) -0.0140(4) 0.0123(3)
C2 0.0197(5) 0.0352(7) 0.0305(6) -0.0058(5) 0.0050(4) -0.0056(5)
F3 0.0404(4) 0.0386(4) 0.0406(4) -0.0077(3) 0.0080(3) 0.0173(4)
C3 0.0315(6) 0.0384(7) 0.0318(6) -0.0054(5) 0.0134(5) -0.0054(5)
C4 0.0278(6) 0.0252(5) 0.0195(5) -0.0007(4) 0.0010(4) -0.0006(4)
C5 0.0575(9) 0.0301(7) 0.0256(6) -0.0047(5) -0.0051(6) -0.0082(6)
C6 0.0288(6) 0.0201(5) 0.0268(5) -0.0015(4) 0.0043(4) 0.0027(4)
 
_geom_special_details
;
 All esds (except the esd in the dihedral angle between two l.s. planes)
 are estimated using the full covariance matrix.  The cell esds are taken
 into account individually in the estimation of esds in distances, angles
 and torsion angles; correlations between esds in cell parameters are only
 used when they are defined by crystal symmetry.  An approximate (isotropic)
 treatment of cell esds is used for estimating esds involving l.s. planes.
;
 
loop_
 _geom_bond_atom_site_label_1
 _geom_bond_atom_site_label_2
 _geom_bond_distance
 _geom_bond_site_symmetry_2
 _geom_bond_publ_flag
Pd1 C6 2.0248(13) 2_655 ?
Pd1 C6 2.0248(13) . ?
Pd1 N1 2.1932(10) . ?
Pd1 N1 2.1932(10) 2_655 ?
F1 C6 1.3596(15) . ?
N1 C1 1.4894(15) . ?
N1 C2 1.4995(15) . ?
N1 C4 1.5064(14) . ?
C1 C1 1.503(2) 2_655 ?
F2 C6 1.3668(15) . ?
C2 C3 1.5199(17) . ?
F3 C6 1.3624(14) . ?
C4 C5 1.5261(18) . ?
 
loop_
 _geom_angle_atom_site_label_1
 _geom_angle_atom_site_label_2
 _geom_angle_atom_site_label_3
 _geom_angle
 _geom_angle_site_symmetry_1
 _geom_angle_site_symmetry_3
 _geom_angle_publ_flag
C6 Pd1 C6 85.90(7) 2_655 . ?
C6 Pd1 N1 177.85(4) 2_655 . ?
C6 Pd1 N1 95.54(5) . . ?
C6 Pd1 N1 95.54(5) 2_655 2_655 ?
C6 Pd1 N1 177.85(4) . 2_655 ?
N1 Pd1 N1 83.06(5) . 2_655 ?
C1 N1 C2 107.55(9) . . ?
C1 N1 C4 110.75(9) . . ?
C2 N1 C4 109.75(9) . . ?
C1 N1 Pd1 104.83(7) . . ?
C2 N1 Pd1 116.94(7) . . ?
C4 N1 Pd1 106.91(7) . . ?
N1 C1 C1 110.86(8) . 2_655 ?
N1 C2 C3 113.47(10) . . ?
N1 C4 C5 116.50(10) . . ?
F1 C6 F3 104.28(10) . . ?
F1 C6 F2 103.23(10) . . ?
F3 C6 F2 102.98(10) . . ?
F1 C6 Pd1 115.27(8) . . ?
F3 C6 Pd1 114.71(8) . . ?
F2 C6 Pd1 114.82(8) . . ?
 
loop_
 _geom_torsion_atom_site_label_1
 _geom_torsion_atom_site_label_2
 _geom_torsion_atom_site_label_3
 _geom_torsion_atom_site_label_4
 _geom_torsion
 _geom_torsion_site_symmetry_1
 _geom_torsion_site_symmetry_2
 _geom_torsion_site_symmetry_3
 _geom_torsion_site_symmetry_4
 _geom_torsion_publ_flag
C6 Pd1 N1 C1 -35.2(11) 2_655 . . . ?
C6 Pd1 N1 C1 -167.37(7) . . . . ?
N1 Pd1 N1 C1 14.27(5) 2_655 . . . ?
C6 Pd1 N1 C2 83.7(11) 2_655 . . . ?
C6 Pd1 N1 C2 -48.40(9) . . . . ?
N1 Pd1 N1 C2 133.25(9) 2_655 . . . ?
C6 Pd1 N1 C4 -152.9(10) 2_655 . . . ?
C6 Pd1 N1 C4 75.01(8) . . . . ?
N1 Pd1 N1 C4 -103.34(7) 2_655 . . . ?
C2 N1 C1 C1 -166.71(10) . . . 2_655 ?
C4 N1 C1 C1 73.37(12) . . . 2_655 ?
Pd1 N1 C1 C1 -41.60(11) . . . 2_655 ?
C1 N1 C2 C3 75.19(13) . . . . ?
C4 N1 C2 C3 -164.26(10) . . . . ?
Pd1 N1 C2 C3 -42.31(13) . . . . ?
C1 N1 C4 C5 58.43(14) . . . . ?
C2 N1 C4 C5 -60.16(14) . . . . ?
Pd1 N1 C4 C5 172.09(10) . . . . ?
C6 Pd1 C6 F1 46.40(7) 2_655 . . . ?
N1 Pd1 C6 F1 -135.20(9) . . . . ?
N1 Pd1 C6 F1 -85.8(11) 2_655 . . . ?
C6 Pd1 C6 F3 -74.76(9) 2_655 . . . ?
N1 Pd1 C6 F3 103.64(9) . . . . ?
N1 Pd1 C6 F3 153.0(10) 2_655 . . . ?
C6 Pd1 C6 F2 166.21(12) 2_655 . . . ?
N1 Pd1 C6 F2 -15.39(10) . . . . ?
N1 Pd1 C6 F2 34.0(11) 2_655 . . . ?
 
_diffrn_measured_fraction_theta_max    0.994
_diffrn_reflns_theta_full              28.31
_diffrn_measured_fraction_theta_full   0.994
_refine_diff_density_max    0.309
_refine_diff_density_min   -0.400
_refine_diff_density_rms    0.053
#===END

data_05038
 
_audit_creation_method            SHELXL-97
_chemical_name_systematic
;
 ?
;
_chemical_name_common             ?
_chemical_melting_point           ?
_chemical_formula_moiety          ?
_chemical_formula_sum
 'C17 H34 F6 P2 Pd'
_chemical_formula_weight          520.78
 
loop_
 _atom_type_symbol
 _atom_type_description
 _atom_type_scat_dispersion_real
 _atom_type_scat_dispersion_imag
 _atom_type_scat_source
 'C'  'C'   0.0033   0.0016
 'International Tables Vol C Tables 4.2.6.8 and 6.1.1.4'
 'H'  'H'   0.0000   0.0000
 'International Tables Vol C Tables 4.2.6.8 and 6.1.1.4'
 'F'  'F'   0.0171   0.0103
 'International Tables Vol C Tables 4.2.6.8 and 6.1.1.4'
 'P'  'P'   0.1023   0.0942
 'International Tables Vol C Tables 4.2.6.8 and 6.1.1.4'
 'Pd'  'Pd'  -0.9988   1.0072
 'International Tables Vol C Tables 4.2.6.8 and 6.1.1.4'
 
_symmetry_cell_setting            Monoclinic
_symmetry_space_group_name_H-M    P2(1)
 
loop_
 _symmetry_equiv_pos_as_xyz
 'x, y, z'
 '-x, y+1/2, -z+1/2'
 '-x, -y, -z'
 'x, -y-1/2, z-1/2'
 
_cell_length_a                    8.0634(6)
_cell_length_b                    14.7398(12)
_cell_length_c                    19.8663(14)
_cell_angle_alpha                 90.00
_cell_angle_beta                  110.509(3)
_cell_angle_gamma                 90.00
_cell_volume                      2211.5(3)
_cell_formula_units_Z             4
_cell_measurement_temperature     293(2)
_cell_measurement_reflns_used     ?
_cell_measurement_theta_min       ?
_cell_measurement_theta_max       ?
 
_exptl_crystal_description        rod
_exptl_crystal_colour             colourless
_exptl_crystal_size_min           0.150
_exptl_crystal_size_mid           0.180
_exptl_crystal_size_max           0.480
_exptl_crystal_density_meas       ?
_exptl_crystal_density_diffrn     1.564
_exptl_crystal_density_method     'not measured'
_exptl_crystal_F_000              1064
_exptl_absorpt_coefficient_mu     1.032
_exptl_absorpt_correction_type    none
_exptl_absorpt_correction_T_min   ?
_exptl_absorpt_correction_T_max   ?
_exptl_absorpt_process_details    ?
 
_exptl_special_details
;
 ?
;
 
_diffrn_ambient_temperature       293(2)
_diffrn_radiation_wavelength      0.71073
_diffrn_radiation_type            MoK\a
_diffrn_radiation_source          'fine-focus sealed tube'
_diffrn_radiation_monochromator   graphite
_diffrn_measurement_device_type   'Bruker P4'
_diffrn_measurement_method        '\w scans'
_diffrn_detector_area_resol_mean  ?
_diffrn_standards_number          ?
_diffrn_standards_interval_count  ?
_diffrn_standards_interval_time   ?
_diffrn_standards_decay_%         ?
_diffrn_reflns_number             17164
_diffrn_reflns_av_R_equivalents   0.0316
_diffrn_reflns_av_sigmaI/netI     0.0359
_diffrn_reflns_limit_h_min        -10
_diffrn_reflns_limit_h_max        10
_diffrn_reflns_limit_k_min        -17
_diffrn_reflns_limit_k_max        19
_diffrn_reflns_limit_l_min        -23
_diffrn_reflns_limit_l_max        26
_diffrn_reflns_theta_min          1.76
_diffrn_reflns_theta_max          28.49
_reflns_number_total              5576
_reflns_number_gt                 4517
_reflns_threshold_expression      >2sigma(I)
 
_computing_data_collection        'Bruker XSCANS'
_computing_cell_refinement        'Bruker XSCANS'
_computing_data_reduction         'Bruker SHELXTL'
_computing_structure_solution     'SHELXS-97 (Sheldrick, 1990)'
_computing_structure_refinement   'SHELXL-97 (Sheldrick, 1997)'
_computing_molecular_graphics     'Bruker SHELXTL'
_computing_publication_material   'Bruker SHELXTL'
 
_refine_special_details
;
 Refinement of F^2^ against ALL reflections.  The weighted R-factor wR and
 goodness of fit S are based on F^2^, conventional R-factors R are based
 on F, with F set to zero for negative F^2^. The threshold expression of
 F^2^ > 2sigma(F^2^) is used only for calculating R-factors(gt) etc. and is
 not relevant to the choice of reflections for refinement.  R-factors based
 on F^2^ are statistically about twice as large as those based on F, and R-
 factors based on ALL data will be even larger.
;
 
_refine_ls_structure_factor_coef  Fsqd
_refine_ls_matrix_type            full
_refine_ls_weighting_scheme       calc
_refine_ls_weighting_details
 'calc w=1/[\s^2^(Fo^2^)+(0.0457P)^2^+5.4450P] where P=(Fo^2^+2Fc^2^)/3'
_atom_sites_solution_primary      direct
_atom_sites_solution_secondary    difmap
_atom_sites_solution_hydrogens    geom
_refine_ls_hydrogen_treatment     riding
_refine_ls_extinction_method      none
_refine_ls_extinction_coef        ?
_refine_ls_number_reflns          5576
_refine_ls_number_parameters      243
_refine_ls_number_restraints      0
_refine_ls_R_factor_all           0.0555
_refine_ls_R_factor_gt            0.0427
_refine_ls_wR_factor_ref          0.1132
_refine_ls_wR_factor_gt           0.1047
_refine_ls_goodness_of_fit_ref    1.037
_refine_ls_restrained_S_all       1.037
_refine_ls_shift/su_max           0.000
_refine_ls_shift/su_mean          0.000
 
loop_
 _atom_site_label
 _atom_site_type_symbol
 _atom_site_fract_x
 _atom_site_fract_y
 _atom_site_fract_z
 _atom_site_U_iso_or_equiv
 _atom_site_adp_type
 _atom_site_occupancy
 _atom_site_symmetry_multiplicity
 _atom_site_calc_flag
 _atom_site_refinement_flags
 _atom_site_disorder_assembly
 _atom_site_disorder_group
P1 P 0.29819(16) 0.07753(6) 0.33833(5) 0.0389(2) Uani 1 1 d . . .
F1 F 0.1601(4) -0.0623(2) 0.08278(14) 0.0597(7) Uani 1 1 d . . .
C1 C 0.2232(5) -0.0992(3) 0.1509(2) 0.0413(9) Uani 1 1 d . . .
Pd2 Pd 0.24589(3) -0.014069(17) 0.236621(14) 0.02730(9) Uani 1 1 d . . .
P2 P 0.04589(13) 0.08757(7) 0.15872(5) 0.0345(2) Uani 1 1 d . . .
F2 F 0.1137(4) -0.1717(2) 0.14519(18) 0.0685(8) Uani 1 1 d . . .
C2 C 0.4137(6) -0.1128(3) 0.3009(2) 0.0438(10) Uani 1 1 d . . .
F3 F 0.3779(4) -0.13823(18) 0.15227(16) 0.0563(7) Uani 1 1 d . . .
C3 C 0.2000(10) 0.1908(3) 0.3263(2) 0.0758(19) Uani 1 1 d . . .
H3A H 0.1218 0.1924 0.3539 0.091 Uiso 1 1 calc R . .
H3B H 0.2956 0.2329 0.3492 0.091 Uiso 1 1 calc R . .
F4 F 0.3614(4) -0.19998(16) 0.28253(15) 0.0579(7) Uani 1 1 d . . .
C4 C 0.1066(12) 0.2262(5) 0.2601(4) 0.153(5) Uani 1 1 d . . .
H4A H 0.0425 0.2769 0.2704 0.183 Uiso 1 1 calc R . .
H4B H 0.1965 0.2530 0.2442 0.183 Uiso 1 1 calc R . .
F5 F 0.5815(4) -0.1100(2) 0.29876(19) 0.0711(9) Uani 1 1 d . . .
C5 C -0.0108(7) 0.1883(3) 0.1993(2) 0.0609(14) Uani 1 1 d . . .
H5A H -0.0431 0.2352 0.1627 0.073 Uiso 1 1 calc R . .
H5B H -0.1168 0.1740 0.2096 0.073 Uiso 1 1 calc R . .
F6 F 0.4442(4) -0.11280(18) 0.37298(14) 0.0671(9) Uani 1 1 d . . .
C6 C 0.2266(9) 0.0265(4) 0.4100(3) 0.0654(15) Uani 1 1 d . . .
H6A H 0.3234 -0.0127 0.4391 0.078 Uiso 1 1 calc R . .
C7 C 0.0665(10) -0.0346(4) 0.3755(4) 0.089(2) Uani 1 1 d . . .
H7A H 0.0320 -0.0622 0.4124 0.134 Uiso 1 1 calc R . .
H7B H 0.0967 -0.0811 0.3480 0.134 Uiso 1 1 calc R . .
H7C H -0.0299 0.0009 0.3446 0.134 Uiso 1 1 calc R . .
C8 C 0.1888(10) 0.0926(5) 0.4610(3) 0.090(2) Uani 1 1 d . . .
H8A H 0.1683 0.0597 0.4991 0.135 Uiso 1 1 calc R . .
H8B H 0.0857 0.1278 0.4355 0.135 Uiso 1 1 calc R . .
H8C H 0.2884 0.1323 0.4810 0.135 Uiso 1 1 calc R . .
C9 C 0.5375(7) 0.0966(3) 0.3800(3) 0.0619(14) Uani 1 1 d . . .
H9A H 0.5910 0.0372 0.3967 0.074 Uiso 1 1 calc R . .
C10 C 0.6116(8) 0.1284(4) 0.3234(4) 0.0827(19) Uani 1 1 d . . .
H10A H 0.7376 0.1353 0.3448 0.124 Uiso 1 1 calc R . .
H10B H 0.5591 0.1855 0.3041 0.124 Uiso 1 1 calc R . .
H10C H 0.5847 0.0843 0.2854 0.124 Uiso 1 1 calc R . .
C11 C 0.5992(9) 0.1597(4) 0.4447(3) 0.087(2) Uani 1 1 d . . .
H11A H 0.7255 0.1664 0.4605 0.131 Uiso 1 1 calc R . .
H11B H 0.5668 0.1346 0.4830 0.131 Uiso 1 1 calc R . .
H11C H 0.5442 0.2180 0.4315 0.131 Uiso 1 1 calc R . .
C12 C -0.1709(7) 0.0331(5) 0.1124(4) 0.089(2) Uani 1 1 d . . .
H12A H -0.1467 -0.0156 0.0836 0.107 Uiso 1 1 calc R . .
C13 C -0.2339(9) -0.0137(6) 0.1655(7) 0.157(5) Uani 1 1 d . . .
H13A H -0.3433 -0.0444 0.1407 0.236 Uiso 1 1 calc R . .
H13B H -0.2522 0.0302 0.1979 0.236 Uiso 1 1 calc R . .
H13C H -0.1467 -0.0570 0.1922 0.236 Uiso 1 1 calc R . .
C14 C -0.3064(10) 0.0983(8) 0.0561(4) 0.134(4) Uani 1 1 d . . .
H14A H -0.4074 0.0639 0.0272 0.201 Uiso 1 1 calc R . .
H14B H -0.2499 0.1254 0.0258 0.201 Uiso 1 1 calc R . .
H14C H -0.3440 0.1450 0.0813 0.201 Uiso 1 1 calc R . .
C15 C 0.1163(8) 0.1338(4) 0.0863(2) 0.0630(15) Uani 1 1 d . . .
H15A H 0.0779 0.0905 0.0464 0.076 Uiso 1 1 calc R . .
C16 C 0.3148(9) 0.1409(4) 0.1096(3) 0.0781(19) Uani 1 1 d . . .
H16A H 0.3471 0.1590 0.0694 0.117 Uiso 1 1 calc R . .
H16B H 0.3671 0.0831 0.1270 0.117 Uiso 1 1 calc R . .
H16C H 0.3567 0.1853 0.1472 0.117 Uiso 1 1 calc R . .
C17 C 0.0312(16) 0.2255(6) 0.0572(4) 0.165(5) Uani 1 1 d . . .
H17A H 0.0706 0.2450 0.0192 0.247 Uiso 1 1 calc R . .
H17B H 0.0651 0.2696 0.0951 0.247 Uiso 1 1 calc R . .
H17C H -0.0953 0.2192 0.0390 0.247 Uiso 1 1 calc R . .
 
loop_
 _atom_site_aniso_label
 _atom_site_aniso_U_11
 _atom_site_aniso_U_22
 _atom_site_aniso_U_33
 _atom_site_aniso_U_23
 _atom_site_aniso_U_13
 _atom_site_aniso_U_12
P1 0.0612(7) 0.0251(4) 0.0264(5) 0.0023(4) 0.0103(4) -0.0046(4)
F1 0.0761(19) 0.0612(17) 0.0367(13) -0.0134(12) 0.0131(13) 0.0176(14)
C1 0.043(2) 0.0336(19) 0.046(2) -0.0099(17) 0.0131(18) -0.0012(16)
Pd2 0.02873(14) 0.02314(14) 0.02908(15) 0.00004(10) 0.00892(10) -0.00211(9)
P2 0.0333(5) 0.0380(5) 0.0297(5) -0.0018(4) 0.0078(4) 0.0117(4)
F2 0.0680(19) 0.0515(16) 0.083(2) -0.0286(15) 0.0226(16) -0.0243(14)
C2 0.045(2) 0.0243(18) 0.052(2) 0.0003(16) 0.0054(18) -0.0020(15)
F3 0.0558(16) 0.0477(15) 0.0685(18) -0.0127(13) 0.0258(14) 0.0103(12)
C3 0.143(6) 0.036(2) 0.032(2) -0.0035(19) 0.011(3) 0.022(3)
F4 0.0730(18) 0.0237(11) 0.0635(17) 0.0016(11) 0.0072(14) -0.0029(11)
C4 0.167(8) 0.090(5) 0.110(6) -0.063(5) -0.066(5) 0.091(6)
F5 0.0421(15) 0.0542(17) 0.104(2) 0.0139(17) 0.0090(15) 0.0093(13)
C5 0.082(4) 0.059(3) 0.037(2) 0.003(2) 0.015(2) 0.043(3)
F6 0.100(2) 0.0367(14) 0.0429(15) 0.0092(11) -0.0029(14) 0.0087(14)
C6 0.104(5) 0.061(3) 0.037(2) 0.013(2) 0.032(3) 0.005(3)
C7 0.141(6) 0.072(4) 0.088(5) -0.004(3) 0.082(5) -0.040(4)
C8 0.121(6) 0.118(6) 0.036(3) -0.008(3) 0.034(3) 0.001(5)
C9 0.072(3) 0.032(2) 0.059(3) 0.007(2) -0.007(2) -0.018(2)
C10 0.070(4) 0.076(4) 0.098(5) -0.016(3) 0.023(3) -0.040(3)
C11 0.121(5) 0.054(3) 0.050(3) 0.001(2) -0.016(3) -0.039(3)
C12 0.037(3) 0.079(4) 0.115(6) 0.000(4) -0.019(3) 0.006(3)
C13 0.041(4) 0.132(8) 0.284(15) 0.078(8) 0.039(6) -0.010(4)
C14 0.072(5) 0.244(12) 0.067(4) 0.000(6) 0.002(4) 0.056(6)
C15 0.104(4) 0.054(3) 0.034(2) 0.016(2) 0.028(3) 0.030(3)
C16 0.119(5) 0.069(4) 0.071(4) -0.001(3) 0.064(4) -0.030(3)
C17 0.301(14) 0.133(7) 0.095(6) 0.088(6) 0.111(8) 0.137(9)
 
_geom_special_details
;
 All esds (except the esd in the dihedral angle between two l.s. planes)
 are estimated using the full covariance matrix.  The cell esds are taken
 into account individually in the estimation of esds in distances, angles
 and torsion angles; correlations between esds in cell parameters are only
 used when they are defined by crystal symmetry.  An approximate (isotropic)
 treatment of cell esds is used for estimating esds involving l.s. planes.
;
 
loop_
 _geom_bond_atom_site_label_1
 _geom_bond_atom_site_label_2
 _geom_bond_distance
 _geom_bond_site_symmetry_2
 _geom_bond_publ_flag
P1 C3 1.827(5) . ?
P1 C9 1.835(5) . ?
P1 C6 1.872(5) . ?
P1 Pd2 2.3424(10) . ?
F1 C1 1.380(5) . ?
C1 F3 1.366(5) . ?
C1 F2 1.366(5) . ?
C1 Pd2 2.070(4) . ?
Pd2 C2 2.090(4) . ?
Pd2 P2 2.3434(10) . ?
P2 C5 1.823(4) . ?
P2 C12 1.850(6) . ?
P2 C15 1.851(5) . ?
C2 F4 1.361(4) . ?
C2 F6 1.366(5) . ?
C2 F5 1.368(5) . ?
C3 C4 1.370(8) . ?
C4 C5 1.365(8) . ?
C6 C8 1.512(8) . ?
C6 C7 1.525(9) . ?
C9 C10 1.521(8) . ?
C9 C11 1.523(7) . ?
C12 C13 1.491(12) . ?
C12 C14 1.584(9) . ?
C15 C16 1.506(8) . ?
C15 C17 1.535(8) . ?
 
loop_
 _geom_angle_atom_site_label_1
 _geom_angle_atom_site_label_2
 _geom_angle_atom_site_label_3
 _geom_angle
 _geom_angle_site_symmetry_1
 _geom_angle_site_symmetry_3
 _geom_angle_publ_flag
C3 P1 C9 105.0(3) . . ?
C3 P1 C6 103.4(3) . . ?
C9 P1 C6 105.9(3) . . ?
C3 P1 Pd2 118.36(15) . . ?
C9 P1 Pd2 108.67(19) . . ?
C6 P1 Pd2 114.47(18) . . ?
F3 C1 F2 103.3(3) . . ?
F3 C1 F1 101.9(3) . . ?
F2 C1 F1 102.8(3) . . ?
F3 C1 Pd2 115.0(3) . . ?
F2 C1 Pd2 114.3(3) . . ?
F1 C1 Pd2 117.7(3) . . ?
C1 Pd2 C2 86.09(17) . . ?
C1 Pd2 P1 174.77(12) . . ?
C2 Pd2 P1 89.57(12) . . ?
C1 Pd2 P2 90.12(12) . . ?
C2 Pd2 P2 175.56(11) . . ?
P1 Pd2 P2 94.33(4) . . ?
C5 P2 C12 103.5(3) . . ?
C5 P2 C15 103.7(2) . . ?
C12 P2 C15 105.5(3) . . ?
C5 P2 Pd2 116.72(15) . . ?
C12 P2 Pd2 111.3(2) . . ?
C15 P2 Pd2 114.89(17) . . ?
F4 C2 F6 101.9(3) . . ?
F4 C2 F5 103.8(3) . . ?
F6 C2 F5 102.4(3) . . ?
F4 C2 Pd2 114.8(3) . . ?
F6 C2 Pd2 118.7(3) . . ?
F5 C2 Pd2 113.3(3) . . ?
C4 C3 P1 122.8(4) . . ?
C5 C4 C3 132.1(8) . . ?
C4 C5 P2 121.4(4) . . ?
C8 C6 C7 110.1(6) . . ?
C8 C6 P1 116.1(4) . . ?
C7 C6 P1 109.5(4) . . ?
C10 C9 C11 109.9(4) . . ?
C10 C9 P1 109.7(4) . . ?
C11 C9 P1 117.0(5) . . ?
C13 C12 C14 117.3(6) . . ?
C13 C12 P2 110.2(6) . . ?
C14 C12 P2 112.7(6) . . ?
C16 C15 C17 109.9(7) . . ?
C16 C15 P2 111.7(3) . . ?
C17 C15 P2 113.5(5) . . ?
 
loop_
 _geom_torsion_atom_site_label_1
 _geom_torsion_atom_site_label_2
 _geom_torsion_atom_site_label_3
 _geom_torsion_atom_site_label_4
 _geom_torsion
 _geom_torsion_site_symmetry_1
 _geom_torsion_site_symmetry_2
 _geom_torsion_site_symmetry_3
 _geom_torsion_site_symmetry_4
 _geom_torsion_publ_flag
F3 C1 Pd2 C2 -42.3(3) . . . . ?
F2 C1 Pd2 C2 77.0(3) . . . . ?
F1 C1 Pd2 C2 -162.4(3) . . . . ?
F3 C1 Pd2 P1 -8.4(16) . . . . ?
F2 C1 Pd2 P1 110.9(13) . . . . ?
F1 C1 Pd2 P1 -128.5(12) . . . . ?
F3 C1 Pd2 P2 140.0(3) . . . . ?
F2 C1 Pd2 P2 -100.7(3) . . . . ?
F1 C1 Pd2 P2 20.0(3) . . . . ?
C3 P1 Pd2 C1 142.4(14) . . . . ?
C9 P1 Pd2 C1 22.9(14) . . . . ?
C6 P1 Pd2 C1 -95.3(14) . . . . ?
C3 P1 Pd2 C2 176.2(3) . . . . ?
C9 P1 Pd2 C2 56.7(2) . . . . ?
C6 P1 Pd2 C2 -61.5(3) . . . . ?
C3 P1 Pd2 P2 -5.9(3) . . . . ?
C9 P1 Pd2 P2 -125.42(16) . . . . ?
C6 P1 Pd2 P2 116.4(2) . . . . ?
C1 Pd2 P2 C5 178.3(3) . . . . ?
C2 Pd2 P2 C5 146.9(17) . . . . ?
P1 Pd2 P2 C5 -4.4(2) . . . . ?
C1 Pd2 P2 C12 59.8(3) . . . . ?
C2 Pd2 P2 C12 28.3(18) . . . . ?
P1 Pd2 P2 C12 -122.9(3) . . . . ?
C1 Pd2 P2 C15 -60.0(2) . . . . ?
C2 Pd2 P2 C15 -91.4(17) . . . . ?
P1 Pd2 P2 C15 117.3(2) . . . . ?
C1 Pd2 C2 F4 -40.1(3) . . . . ?
P1 Pd2 C2 F4 142.8(3) . . . . ?
P2 Pd2 C2 F4 -9(2) . . . . ?
C1 Pd2 C2 F6 -160.9(3) . . . . ?
P1 Pd2 C2 F6 22.0(3) . . . . ?
P2 Pd2 C2 F6 -129.4(16) . . . . ?
C1 Pd2 C2 F5 78.9(3) . . . . ?
P1 Pd2 C2 F5 -98.2(3) . . . . ?
P2 Pd2 C2 F5 110.5(16) . . . . ?
C9 P1 C3 C4 117.3(9) . . . . ?
C6 P1 C3 C4 -131.9(8) . . . . ?
Pd2 P1 C3 C4 -4.1(9) . . . . ?
P1 C3 C4 C5 38.7(16) . . . . ?
C3 C4 C5 P2 -53.9(15) . . . . ?
C12 P2 C5 C4 152.7(8) . . . . ?
C15 P2 C5 C4 -97.4(8) . . . . ?
Pd2 P2 C5 C4 30.0(8) . . . . ?
C3 P1 C6 C8 -26.4(6) . . . . ?
C9 P1 C6 C8 83.7(5) . . . . ?
Pd2 P1 C6 C8 -156.6(4) . . . . ?
C3 P1 C6 C7 99.0(5) . . . . ?
C9 P1 C6 C7 -150.8(5) . . . . ?
Pd2 P1 C6 C7 -31.1(5) . . . . ?
C3 P1 C9 C10 -77.2(4) . . . . ?
C6 P1 C9 C10 173.8(4) . . . . ?
Pd2 P1 C9 C10 50.3(4) . . . . ?
C3 P1 C9 C11 48.8(4) . . . . ?
C6 P1 C9 C11 -60.2(4) . . . . ?
Pd2 P1 C9 C11 176.3(3) . . . . ?
C5 P2 C12 C13 -76.2(6) . . . . ?
C15 P2 C12 C13 175.2(6) . . . . ?
Pd2 P2 C12 C13 50.0(6) . . . . ?
C5 P2 C12 C14 56.9(6) . . . . ?
C15 P2 C12 C14 -51.7(6) . . . . ?
Pd2 P2 C12 C14 -176.9(5) . . . . ?
C5 P2 C15 C16 97.9(4) . . . . ?
C12 P2 C15 C16 -153.6(4) . . . . ?
Pd2 P2 C15 C16 -30.7(5) . . . . ?
C5 P2 C15 C17 -27.1(7) . . . . ?
C12 P2 C15 C17 81.4(7) . . . . ?
Pd2 P2 C15 C17 -155.6(6) . . . . ?
 
_diffrn_measured_fraction_theta_max    0.996
_diffrn_reflns_theta_full              28.49
_diffrn_measured_fraction_theta_full   0.996
_refine_diff_density_max    1.502
_refine_diff_density_min   -1.198
_refine_diff_density_rms    0.105
#===END

data_06004
 
_audit_creation_method            SHELXL-97
_chemical_name_systematic
;
 ?
;
_chemical_name_common             ?
_chemical_melting_point           ?
_chemical_formula_moiety          ?
_chemical_formula_sum
 'C27 H51 Cl P2 Pd'
_chemical_formula_weight          579.47
 
loop_
 _atom_type_symbol
 _atom_type_description
 _atom_type_scat_dispersion_real
 _atom_type_scat_dispersion_imag
 _atom_type_scat_source
 'C'  'C'   0.0033   0.0016
 'International Tables Vol C Tables 4.2.6.8 and 6.1.1.4'
 'H'  'H'   0.0000   0.0000
 'International Tables Vol C Tables 4.2.6.8 and 6.1.1.4'
 'Cl'  'Cl'   0.1484   0.1585
 'International Tables Vol C Tables 4.2.6.8 and 6.1.1.4'
 'P'  'P'   0.1023   0.0942
 'International Tables Vol C Tables 4.2.6.8 and 6.1.1.4'
 'Pd'  'Pd'  -0.9988   1.0072
 'International Tables Vol C Tables 4.2.6.8 and 6.1.1.4'
 
_symmetry_cell_setting            Monoclinic
_symmetry_space_group_name_H-M    C2/c
 
loop_
 _symmetry_equiv_pos_as_xyz
 'x, y, z'
 '-x, y, -z+1/2'
 'x+1/2, y+1/2, z'
 '-x+1/2, y+1/2, -z+1/2'
 '-x, -y, -z'
 'x, -y, z-1/2'
 '-x+1/2, -y+1/2, -z'
 'x+1/2, -y+1/2, z-1/2'
 
_cell_length_a                    41.609(8)
_cell_length_b                    10.381(2)
_cell_length_c                    15.233(3)
_cell_angle_alpha                 90.00
_cell_angle_beta                  104.47(3)
_cell_angle_gamma                 90.00
_cell_volume                      6371(2)
_cell_formula_units_Z             8
_cell_measurement_temperature     293(2)
_cell_measurement_reflns_used     ?
_cell_measurement_theta_min       ?
_cell_measurement_theta_max       ?
 
_exptl_crystal_description        'parallelpiped'
_exptl_crystal_colour             'colorless'
_exptl_crystal_size_min           0.05
_exptl_crystal_size_mid           0.10
_exptl_crystal_size_max           0.12
_exptl_crystal_density_meas       ?
_exptl_crystal_density_diffrn     1.208
_exptl_crystal_density_method     'not measured'
_exptl_crystal_F_000              2448
_exptl_absorpt_coefficient_mu     0.779
_exptl_absorpt_correction_type    none
_exptl_absorpt_correction_T_min   ?
_exptl_absorpt_correction_T_max   ?
_exptl_absorpt_process_details    ?
 
_exptl_special_details
;
 ?
;
 
_diffrn_ambient_temperature       293(2)
_diffrn_radiation_wavelength      0.71069
_diffrn_radiation_type            MoK\a
_diffrn_radiation_source          'fine-focus sealed tube'
_diffrn_radiation_monochromator   graphite
_diffrn_measurement_device_type   'Bruker P4'
_diffrn_measurement_method        '\w scans'
_diffrn_detector_area_resol_mean  ?
_diffrn_standards_number          ?
_diffrn_standards_interval_count  ?
_diffrn_standards_interval_time   ?
_diffrn_standards_decay_%         ?
_diffrn_reflns_number             14434
_diffrn_reflns_av_R_equivalents   0.0630
_diffrn_reflns_av_sigmaI/netI     0.0577
_diffrn_reflns_limit_h_min        -47
_diffrn_reflns_limit_h_max        47
_diffrn_reflns_limit_k_min        -11
_diffrn_reflns_limit_k_max        11
_diffrn_reflns_limit_l_min        -17
_diffrn_reflns_limit_l_max        17
_diffrn_reflns_theta_min          2.38
_diffrn_reflns_theta_max          24.14
_reflns_number_total              4652
_reflns_number_gt                 4008
_reflns_threshold_expression      >2sigma(I)
 
_computing_data_collection        'Bruker XSCANS'
_computing_cell_refinement        'Bruker XSCANS'
_computing_data_reduction         'Bruker SHELXTL'
_computing_structure_solution     'SHELXS-97 (Sheldrick, 1990)'
_computing_structure_refinement   'SHELXL-97 (Sheldrick, 1997)'
_computing_molecular_graphics     'Bruker SHELXTL'
_computing_publication_material   'Bruker SHELXTL'
 
_refine_special_details
;
 Refinement of F^2^ against ALL reflections.  The weighted R-factor wR and
 goodness of fit S are based on F^2^, conventional R-factors R are based
 on F, with F set to zero for negative F^2^. The threshold expression of
 F^2^ > 2sigma(F^2^) is used only for calculating R-factors(gt) etc. and is
 not relevant to the choice of reflections for refinement.  R-factors based
 on F^2^ are statistically about twice as large as those based on F, and R-
 factors based on ALL data will be even larger.
;
 
_refine_ls_structure_factor_coef  Fsqd
_refine_ls_matrix_type            full
_refine_ls_weighting_scheme       calc
_refine_ls_weighting_details
 'calc w=1/[\s^2^(Fo^2^)+(0.0738P)^2^+20.3116P] where P=(Fo^2^+2Fc^2^)/3'
_atom_sites_solution_primary      direct
_atom_sites_solution_secondary    difmap
_atom_sites_solution_hydrogens    geom
_refine_ls_hydrogen_treatment     riding
_refine_ls_extinction_method      SHELXL
_refine_ls_extinction_coef        0.0047(3)
_refine_ls_extinction_expression
 'Fc^*^=kFc[1+0.001xFc^2^\l^3^/sin(2\q)]^-1/4^'
_refine_ls_number_reflns          4652
_refine_ls_number_parameters      282
_refine_ls_number_restraints      0
_refine_ls_R_factor_all           0.0733
_refine_ls_R_factor_gt            0.0565
_refine_ls_wR_factor_ref          0.1499
_refine_ls_wR_factor_gt           0.1386
_refine_ls_goodness_of_fit_ref    1.175
_refine_ls_restrained_S_all       1.175
_refine_ls_shift/su_max           0.000
_refine_ls_shift/su_mean          0.000
 
loop_
 _atom_site_label
 _atom_site_type_symbol
 _atom_site_fract_x
 _atom_site_fract_y
 _atom_site_fract_z
 _atom_site_U_iso_or_equiv
 _atom_site_adp_type
 _atom_site_occupancy
 _atom_site_symmetry_multiplicity
 _atom_site_calc_flag
 _atom_site_refinement_flags
 _atom_site_disorder_assembly
 _atom_site_disorder_group
Pd1 Pd 0.123881(11) 0.44141(4) 0.23920(3) 0.0255(2) Uani 1 1 d . . .
Cl1 Cl 0.14580(5) 0.59555(17) 0.15394(12) 0.0501(5) Uani 1 1 d . . .
P1 P 0.17145(4) 0.44572(14) 0.35739(10) 0.0262(4) Uani 1 1 d . . .
P2 P 0.10526(4) 0.28456(14) 0.31264(10) 0.0250(4) Uani 1 1 d . . .
C1 C 0.07831(15) 0.4439(6) 0.1372(4) 0.0378(15) Uani 1 1 d . . .
H1A H 0.0634 0.3813 0.1515 0.057 Uiso 1 1 calc R . .
H1B H 0.0825 0.4237 0.0796 0.057 Uiso 1 1 calc R . .
H1C H 0.0685 0.5280 0.1346 0.057 Uiso 1 1 calc R . .
C2 C 0.16936(14) 0.3085(6) 0.4331(4) 0.0292(13) Uani 1 1 d . . .
H2A H 0.1817 0.2366 0.4172 0.035 Uiso 1 1 calc R . .
H2B H 0.1799 0.3328 0.4951 0.035 Uiso 1 1 calc R . .
C3 C 0.13365(14) 0.2655(6) 0.4273(4) 0.0295(13) Uani 1 1 d . . .
H3A H 0.1250 0.3153 0.4703 0.035 Uiso 1 1 calc R . .
H3B H 0.1339 0.1757 0.4449 0.035 Uiso 1 1 calc R . .
C4 C 0.17578(15) 0.5877(5) 0.4315(4) 0.0302(13) Uani 1 1 d . . .
H4A H 0.1914 0.5667 0.4893 0.036 Uiso 1 1 calc R . .
C5 C 0.14216(16) 0.6219(6) 0.4503(4) 0.0373(15) Uani 1 1 d . . .
H5A H 0.1260 0.6363 0.3931 0.045 Uiso 1 1 calc R . .
H5B H 0.1346 0.5498 0.4802 0.045 Uiso 1 1 calc R . .
C6 C 0.14416(19) 0.7422(6) 0.5096(5) 0.0439(17) Uani 1 1 d . . .
H6A H 0.1222 0.7626 0.5168 0.053 Uiso 1 1 calc R . .
H6B H 0.1584 0.7248 0.5692 0.053 Uiso 1 1 calc R . .
C7 C 0.1576(2) 0.8564(7) 0.4683(5) 0.0512(19) Uani 1 1 d . . .
H7A H 0.1422 0.8794 0.4114 0.061 Uiso 1 1 calc R . .
H7B H 0.1597 0.9297 0.5089 0.061 Uiso 1 1 calc R . .
C8 C 0.1908(2) 0.8258(7) 0.4517(6) 0.058(2) Uani 1 1 d . . .
H8A H 0.2067 0.8110 0.5093 0.069 Uiso 1 1 calc R . .
H8B H 0.1984 0.8989 0.4228 0.069 Uiso 1 1 calc R . .
C9 C 0.18915(17) 0.7047(6) 0.3906(5) 0.0420(16) Uani 1 1 d . . .
H9A H 0.1749 0.7225 0.3310 0.050 Uiso 1 1 calc R . .
H9B H 0.2112 0.6855 0.3835 0.050 Uiso 1 1 calc R . .
C10 C 0.21167(14) 0.4284(6) 0.3275(4) 0.0324(14) Uani 1 1 d . . .
H10A H 0.2150 0.5077 0.2959 0.039 Uiso 1 1 calc R . .
C11 C 0.24202(15) 0.4158(7) 0.4102(5) 0.0394(15) Uani 1 1 d . . .
H11A H 0.2429 0.4901 0.4494 0.047 Uiso 1 1 calc R . .
H11B H 0.2395 0.3395 0.4446 0.047 Uiso 1 1 calc R . .
C12 C 0.27408(17) 0.4065(7) 0.3809(6) 0.0498(19) Uani 1 1 d . . .
H12A H 0.2925 0.3955 0.4337 0.060 Uiso 1 1 calc R . .
H12B H 0.2776 0.4856 0.3506 0.060 Uiso 1 1 calc R . .
C13 C 0.27267(18) 0.2927(8) 0.3166(6) 0.063(2) Uani 1 1 d . . .
H13A H 0.2706 0.2132 0.3481 0.076 Uiso 1 1 calc R . .
H13B H 0.2931 0.2888 0.2968 0.076 Uiso 1 1 calc R . .
C14 C 0.24292(19) 0.3067(9) 0.2334(6) 0.063(2) Uani 1 1 d . . .
H14A H 0.2461 0.3820 0.1988 0.076 Uiso 1 1 calc R . .
H14B H 0.2417 0.2317 0.1947 0.076 Uiso 1 1 calc R . .
C15 C 0.21080(16) 0.3199(7) 0.2617(5) 0.0463(18) Uani 1 1 d . . .
H15A H 0.1928 0.3345 0.2082 0.056 Uiso 1 1 calc R . .
H15B H 0.2063 0.2399 0.2893 0.056 Uiso 1 1 calc R . .
C16 C 0.06401(14) 0.3013(6) 0.3349(4) 0.0289(13) Uani 1 1 d . . .
H16A H 0.0479 0.2993 0.2758 0.035 Uiso 1 1 calc R . .
C17 C 0.06011(17) 0.4331(6) 0.3773(5) 0.0433(17) Uani 1 1 d . . .
H17A H 0.0764 0.4413 0.4350 0.052 Uiso 1 1 calc R . .
H17B H 0.0641 0.5012 0.3377 0.052 Uiso 1 1 calc R . .
C18 C 0.02508(19) 0.4475(8) 0.3920(6) 0.057(2) Uani 1 1 d . . .
H18A H 0.0236 0.5289 0.4219 0.069 Uiso 1 1 calc R . .
H18B H 0.0091 0.4494 0.3334 0.069 Uiso 1 1 calc R . .
C19 C 0.01602(18) 0.3392(8) 0.4484(5) 0.0514(19) Uani 1 1 d . . .
H19A H -0.0067 0.3498 0.4525 0.062 Uiso 1 1 calc R . .
H19B H 0.0304 0.3422 0.5093 0.062 Uiso 1 1 calc R . .
C20 C 0.01983(17) 0.2101(8) 0.4051(5) 0.0481(18) Uani 1 1 d . . .
H20A H 0.0036 0.2040 0.3472 0.058 Uiso 1 1 calc R . .
H20B H 0.0153 0.1415 0.4436 0.058 Uiso 1 1 calc R . .
C21 C 0.05477(16) 0.1915(7) 0.3906(5) 0.0414(16) Uani 1 1 d . . .
H21A H 0.0708 0.1875 0.4490 0.050 Uiso 1 1 calc R . .
H21B H 0.0556 0.1105 0.3595 0.050 Uiso 1 1 calc R . .
C22 C 0.10472(14) 0.1229(6) 0.2616(4) 0.0280(13) Uani 1 1 d . . .
H22A H 0.1013 0.0604 0.3065 0.034 Uiso 1 1 calc R . .
C23 C 0.07664(16) 0.1037(7) 0.1757(5) 0.0425(17) Uani 1 1 d . . .
H23A H 0.0555 0.1191 0.1898 0.051 Uiso 1 1 calc R . .
H23B H 0.0790 0.1659 0.1302 0.051 Uiso 1 1 calc R . .
C24 C 0.07693(18) -0.0316(7) 0.1377(6) 0.0509(19) Uani 1 1 d . . .
H24A H 0.0731 -0.0937 0.1815 0.061 Uiso 1 1 calc R . .
H24B H 0.0592 -0.0399 0.0830 0.061 Uiso 1 1 calc R . .
C25 C 0.10981(18) -0.0599(7) 0.1163(5) 0.0445(17) Uani 1 1 d . . .
H25A H 0.1129 -0.0026 0.0688 0.053 Uiso 1 1 calc R . .
H25B H 0.1099 -0.1478 0.0947 0.053 Uiso 1 1 calc R . .
C26 C 0.13797(19) -0.0419(7) 0.2003(5) 0.0500(19) Uani 1 1 d . . .
H26A H 0.1589 -0.0559 0.1846 0.060 Uiso 1 1 calc R . .
H26B H 0.1361 -0.1060 0.2450 0.060 Uiso 1 1 calc R . .
C27 C 0.13819(16) 0.0913(6) 0.2417(5) 0.0370(15) Uani 1 1 d . . .
H27A H 0.1431 0.1550 0.2002 0.044 Uiso 1 1 calc R . .
H27B H 0.1556 0.0955 0.2975 0.044 Uiso 1 1 calc R . .
 
loop_
 _atom_site_aniso_label
 _atom_site_aniso_U_11
 _atom_site_aniso_U_22
 _atom_site_aniso_U_33
 _atom_site_aniso_U_23
 _atom_site_aniso_U_13
 _atom_site_aniso_U_12
Pd1 0.0284(3) 0.0300(3) 0.0186(3) 0.00268(18) 0.00684(18) 0.00158(18)
Cl1 0.0685(12) 0.0496(11) 0.0336(10) 0.0097(7) 0.0152(8) -0.0144(8)
P1 0.0260(8) 0.0317(9) 0.0216(8) -0.0003(6) 0.0074(6) -0.0003(6)
P2 0.0258(8) 0.0309(8) 0.0196(8) 0.0000(6) 0.0081(6) 0.0006(6)
C1 0.030(3) 0.048(4) 0.031(4) 0.011(3) -0.002(3) 0.004(3)
C2 0.033(3) 0.029(3) 0.024(3) 0.001(2) 0.004(2) 0.004(2)
C3 0.036(3) 0.035(3) 0.017(3) 0.005(2) 0.007(2) 0.000(3)
C4 0.034(3) 0.029(3) 0.027(3) -0.002(2) 0.006(3) -0.002(2)
C5 0.043(4) 0.045(4) 0.028(4) -0.006(3) 0.018(3) -0.006(3)
C6 0.057(5) 0.043(4) 0.037(4) -0.009(3) 0.020(3) 0.001(3)
C7 0.071(5) 0.037(4) 0.052(5) -0.013(3) 0.026(4) 0.001(3)
C8 0.067(5) 0.041(4) 0.072(6) -0.019(4) 0.031(4) -0.019(4)
C9 0.045(4) 0.043(4) 0.044(4) -0.005(3) 0.023(3) -0.003(3)
C10 0.026(3) 0.044(4) 0.030(3) -0.002(3) 0.010(3) -0.002(3)
C11 0.032(4) 0.048(4) 0.036(4) -0.005(3) 0.003(3) -0.001(3)
C12 0.030(4) 0.050(4) 0.068(5) -0.009(4) 0.008(3) 0.000(3)
C13 0.032(4) 0.070(6) 0.089(7) -0.019(5) 0.019(4) 0.007(4)
C14 0.049(5) 0.085(6) 0.065(6) -0.031(5) 0.032(4) -0.004(4)
C15 0.029(4) 0.068(5) 0.044(4) -0.019(4) 0.015(3) -0.004(3)
C16 0.026(3) 0.036(3) 0.027(3) -0.004(3) 0.011(2) 0.000(2)
C17 0.039(4) 0.045(4) 0.052(4) -0.009(3) 0.023(3) 0.001(3)
C18 0.049(5) 0.064(5) 0.067(6) -0.018(4) 0.029(4) 0.007(4)
C19 0.038(4) 0.082(6) 0.041(4) -0.014(4) 0.022(3) 0.002(4)
C20 0.035(4) 0.069(5) 0.044(4) 0.007(4) 0.016(3) -0.006(3)
C21 0.036(4) 0.047(4) 0.048(4) 0.004(3) 0.021(3) 0.000(3)
C22 0.031(3) 0.027(3) 0.029(3) 0.001(2) 0.011(3) 0.000(2)
C23 0.034(4) 0.052(4) 0.041(4) -0.019(3) 0.008(3) 0.000(3)
C24 0.045(4) 0.055(5) 0.052(5) -0.025(4) 0.012(4) -0.006(3)
C25 0.056(4) 0.044(4) 0.037(4) -0.010(3) 0.018(3) 0.003(3)
C26 0.050(4) 0.047(4) 0.055(5) -0.008(3) 0.017(4) 0.012(3)
C27 0.032(3) 0.043(4) 0.039(4) -0.007(3) 0.015(3) 0.005(3)
 
_geom_special_details
;
 All esds (except the esd in the dihedral angle between two l.s. planes)
 are estimated using the full covariance matrix.  The cell esds are taken
 into account individually in the estimation of esds in distances, angles
 and torsion angles; correlations between esds in cell parameters are only
 used when they are defined by crystal symmetry.  An approximate (isotropic)
 treatment of cell esds is used for estimating esds involving l.s. planes.
;
 
loop_
 _geom_bond_atom_site_label_1
 _geom_bond_atom_site_label_2
 _geom_bond_distance
 _geom_bond_site_symmetry_2
 _geom_bond_publ_flag
Pd1 C1 2.130(6) . ?
Pd1 P2 2.2218(16) . ?
Pd1 P1 2.3195(18) . ?
Pd1 Cl1 2.3814(17) . ?
P1 C4 1.838(6) . ?
P1 C2 1.849(6) . ?
P1 C10 1.850(6) . ?
P2 C16 1.839(6) . ?
P2 C22 1.848(6) . ?
P2 C3 1.858(6) . ?
C2 C3 1.533(8) . ?
C4 C9 1.532(9) . ?
C4 C5 1.538(8) . ?
C5 C6 1.531(9) . ?
C6 C7 1.513(10) . ?
C7 C8 1.500(10) . ?
C8 C9 1.555(9) . ?
C10 C15 1.503(9) . ?
C10 C11 1.551(9) . ?
C11 C12 1.512(9) . ?
C12 C13 1.526(10) . ?
C13 C14 1.541(11) . ?
C14 C15 1.509(9) . ?
C16 C21 1.526(9) . ?
C16 C17 1.539(8) . ?
C17 C18 1.536(9) . ?
C18 C19 1.519(11) . ?
C19 C20 1.519(10) . ?
C20 C21 1.537(9) . ?
C22 C27 1.533(8) . ?
C22 C23 1.534(8) . ?
C23 C24 1.520(9) . ?
C24 C25 1.512(10) . ?
C25 C26 1.515(10) . ?
C26 C27 1.518(9) . ?
 
loop_
 _geom_angle_atom_site_label_1
 _geom_angle_atom_site_label_2
 _geom_angle_atom_site_label_3
 _geom_angle
 _geom_angle_site_symmetry_1
 _geom_angle_site_symmetry_3
 _geom_angle_publ_flag
C1 Pd1 P2 91.00(18) . . ?
C1 Pd1 P1 175.8(2) . . ?
P2 Pd1 P1 87.74(6) . . ?
C1 Pd1 Cl1 89.22(18) . . ?
P2 Pd1 Cl1 175.08(6) . . ?
P1 Pd1 Cl1 92.38(6) . . ?
C4 P1 C2 104.3(3) . . ?
C4 P1 C10 105.9(3) . . ?
C2 P1 C10 105.4(3) . . ?
C4 P1 Pd1 115.2(2) . . ?
C2 P1 Pd1 107.78(19) . . ?
C10 P1 Pd1 117.1(2) . . ?
C16 P2 C22 104.5(3) . . ?
C16 P2 C3 103.9(3) . . ?
C22 P2 C3 103.7(3) . . ?
C16 P2 Pd1 118.9(2) . . ?
C22 P2 Pd1 115.01(19) . . ?
C3 P2 Pd1 109.34(19) . . ?
C3 C2 P1 112.6(4) . . ?
C2 C3 P2 113.8(4) . . ?
C9 C4 C5 109.4(5) . . ?
C9 C4 P1 112.1(4) . . ?
C5 C4 P1 110.2(4) . . ?
C6 C5 C4 112.3(5) . . ?
C7 C6 C5 111.4(5) . . ?
C8 C7 C6 110.8(6) . . ?
C7 C8 C9 111.5(6) . . ?
C4 C9 C8 111.3(5) . . ?
C15 C10 C11 111.0(5) . . ?
C15 C10 P1 111.4(4) . . ?
C11 C10 P1 114.3(4) . . ?
C12 C11 C10 111.4(6) . . ?
C11 C12 C13 110.1(6) . . ?
C12 C13 C14 110.4(6) . . ?
C15 C14 C13 111.1(6) . . ?
C10 C15 C14 112.5(6) . . ?
C21 C16 C17 111.3(5) . . ?
C21 C16 P2 114.1(4) . . ?
C17 C16 P2 111.3(4) . . ?
C18 C17 C16 110.5(5) . . ?
C19 C18 C17 112.9(6) . . ?
C18 C19 C20 109.8(6) . . ?
C19 C20 C21 112.2(6) . . ?
C16 C21 C20 111.4(5) . . ?
C27 C22 C23 109.9(5) . . ?
C27 C22 P2 111.2(4) . . ?
C23 C22 P2 113.8(4) . . ?
C24 C23 C22 111.6(6) . . ?
C25 C24 C23 110.8(6) . . ?
C24 C25 C26 110.2(6) . . ?
C25 C26 C27 112.7(6) . . ?
C26 C27 C22 111.4(6) . . ?
 
loop_
 _geom_torsion_atom_site_label_1
 _geom_torsion_atom_site_label_2
 _geom_torsion_atom_site_label_3
 _geom_torsion_atom_site_label_4
 _geom_torsion
 _geom_torsion_site_symmetry_1
 _geom_torsion_site_symmetry_2
 _geom_torsion_site_symmetry_3
 _geom_torsion_site_symmetry_4
 _geom_torsion_publ_flag
C1 Pd1 P1 C4 -36(2) . . . . ?
P2 Pd1 P1 C4 -108.6(2) . . . . ?
Cl1 Pd1 P1 C4 76.3(2) . . . . ?
C1 Pd1 P1 C2 80(2) . . . . ?
P2 Pd1 P1 C2 7.4(2) . . . . ?
Cl1 Pd1 P1 C2 -167.7(2) . . . . ?
C1 Pd1 P1 C10 -161(2) . . . . ?
P2 Pd1 P1 C10 125.9(2) . . . . ?
Cl1 Pd1 P1 C10 -49.2(2) . . . . ?
C1 Pd1 P2 C16 -48.8(3) . . . . ?
P1 Pd1 P2 C16 127.2(2) . . . . ?
Cl1 Pd1 P2 C16 -141.3(7) . . . . ?
C1 Pd1 P2 C22 76.1(3) . . . . ?
P1 Pd1 P2 C22 -108.0(2) . . . . ?
Cl1 Pd1 P2 C22 -16.4(8) . . . . ?
C1 Pd1 P2 C3 -167.8(3) . . . . ?
P1 Pd1 P2 C3 8.2(2) . . . . ?
Cl1 Pd1 P2 C3 99.8(8) . . . . ?
C4 P1 C2 C3 97.6(4) . . . . ?
C10 P1 C2 C3 -151.1(4) . . . . ?
Pd1 P1 C2 C3 -25.3(4) . . . . ?
P1 C2 C3 P2 33.5(5) . . . . ?
C16 P2 C3 C2 -154.4(4) . . . . ?
C22 P2 C3 C2 96.6(5) . . . . ?
Pd1 P2 C3 C2 -26.5(5) . . . . ?
C2 P1 C4 C9 161.3(4) . . . . ?
C10 P1 C4 C9 50.3(5) . . . . ?
Pd1 P1 C4 C9 -80.8(5) . . . . ?
C2 P1 C4 C5 -76.6(5) . . . . ?
C10 P1 C4 C5 172.4(4) . . . . ?
Pd1 P1 C4 C5 41.3(5) . . . . ?
C9 C4 C5 C6 -54.7(7) . . . . ?
P1 C4 C5 C6 -178.3(4) . . . . ?
C4 C5 C6 C7 55.9(8) . . . . ?
C5 C6 C7 C8 -56.1(8) . . . . ?
C6 C7 C8 C9 56.4(9) . . . . ?
C5 C4 C9 C8 54.3(7) . . . . ?
P1 C4 C9 C8 176.9(5) . . . . ?
C7 C8 C9 C4 -56.5(9) . . . . ?
C4 P1 C10 C15 -176.4(5) . . . . ?
C2 P1 C10 C15 73.5(5) . . . . ?
Pd1 P1 C10 C15 -46.3(5) . . . . ?
C4 P1 C10 C11 56.9(5) . . . . ?
C2 P1 C10 C11 -53.3(5) . . . . ?
Pd1 P1 C10 C11 -173.1(4) . . . . ?
C15 C10 C11 C12 54.9(7) . . . . ?
P1 C10 C11 C12 -178.1(5) . . . . ?
C10 C11 C12 C13 -57.2(8) . . . . ?
C11 C12 C13 C14 57.7(9) . . . . ?
C12 C13 C14 C15 -56.3(10) . . . . ?
C11 C10 C15 C14 -53.6(8) . . . . ?
P1 C10 C15 C14 177.9(6) . . . . ?
C13 C14 C15 C10 54.8(9) . . . . ?
C22 P2 C16 C21 53.6(5) . . . . ?
C3 P2 C16 C21 -54.8(5) . . . . ?
Pd1 P2 C16 C21 -176.6(4) . . . . ?
C22 P2 C16 C17 -179.5(4) . . . . ?
C3 P2 C16 C17 72.1(5) . . . . ?
Pd1 P2 C16 C17 -49.6(5) . . . . ?
C21 C16 C17 C18 -53.8(8) . . . . ?
P2 C16 C17 C18 177.8(5) . . . . ?
C16 C17 C18 C19 55.4(9) . . . . ?
C17 C18 C19 C20 -55.8(8) . . . . ?
C18 C19 C20 C21 55.4(8) . . . . ?
C17 C16 C21 C20 54.2(7) . . . . ?
P2 C16 C21 C20 -178.9(5) . . . . ?
C19 C20 C21 C16 -55.5(8) . . . . ?
C16 P2 C22 C27 -178.0(4) . . . . ?
C3 P2 C22 C27 -69.4(5) . . . . ?
Pd1 P2 C22 C27 49.9(5) . . . . ?
C16 P2 C22 C23 57.3(5) . . . . ?
C3 P2 C22 C23 165.9(4) . . . . ?
Pd1 P2 C22 C23 -74.8(5) . . . . ?
C27 C22 C23 C24 55.7(7) . . . . ?
P2 C22 C23 C24 -178.8(5) . . . . ?
C22 C23 C24 C25 -58.1(8) . . . . ?
C23 C24 C25 C26 56.8(8) . . . . ?
C24 C25 C26 C27 -55.7(8) . . . . ?
C25 C26 C27 C22 54.6(8) . . . . ?
C23 C22 C27 C26 -53.5(7) . . . . ?
P2 C22 C27 C26 179.6(5) . . . . ?
 
_diffrn_measured_fraction_theta_max    0.915
_diffrn_reflns_theta_full              24.14
_diffrn_measured_fraction_theta_full   0.915
_refine_diff_density_max    1.501
_refine_diff_density_min   -1.220
_refine_diff_density_rms    0.132
#===END

data_06005
 
_audit_creation_method            SHELXL-97
_chemical_name_systematic
;
 ?
;
_chemical_name_common             ?
_chemical_melting_point           ?
_chemical_formula_moiety          ?
_chemical_formula_sum
 'C31 H35 Cl O P2 Pd'
_chemical_formula_weight          627.38
 
loop_
 _atom_type_symbol
 _atom_type_description
 _atom_type_scat_dispersion_real
 _atom_type_scat_dispersion_imag
 _atom_type_scat_source
 'C'  'C'   0.0033   0.0016
 'International Tables Vol C Tables 4.2.6.8 and 6.1.1.4'
 'H'  'H'   0.0000   0.0000
 'International Tables Vol C Tables 4.2.6.8 and 6.1.1.4'
 'Cl'  'Cl'   0.1484   0.1585
 'International Tables Vol C Tables 4.2.6.8 and 6.1.1.4'
 'O'  'O'   0.0106   0.0060
 'International Tables Vol C Tables 4.2.6.8 and 6.1.1.4'
 'P'  'P'   0.1023   0.0942
 'International Tables Vol C Tables 4.2.6.8 and 6.1.1.4'
 'Pd'  'Pd'  -0.9988   1.0072
 'International Tables Vol C Tables 4.2.6.8 and 6.1.1.4'
 
_symmetry_cell_setting            Orthorhombic
_symmetry_space_group_name_H-M    P2(1)2(1)2(1)
 
loop_
 _symmetry_equiv_pos_as_xyz
 'x, y, z'
 '-x+1/2, -y, z+1/2'
 'x+1/2, -y+1/2, -z'
 '-x, y+1/2, -z+1/2'
 
_cell_length_a                    9.6235(19)
_cell_length_b                    13.770(3)
_cell_length_c                    21.883(4)
_cell_angle_alpha                 90.00
_cell_angle_beta                  90.00
_cell_angle_gamma                 90.00
_cell_volume                      2899.8(10)
_cell_formula_units_Z             4
_cell_measurement_temperature     293(2)
_cell_measurement_reflns_used     ?
_cell_measurement_theta_min       ?
_cell_measurement_theta_max       ?
 
_exptl_crystal_description        parallelpiped
_exptl_crystal_colour             colorless
_exptl_crystal_size_min           0.10
_exptl_crystal_size_mid           0.15
_exptl_crystal_size_max           0.40
_exptl_crystal_density_meas       ?
_exptl_crystal_density_diffrn     1.437
_exptl_crystal_density_method     'not measured'
_exptl_crystal_F_000              1288
_exptl_absorpt_coefficient_mu     0.865
_exptl_absorpt_correction_type    none
_exptl_absorpt_correction_T_min   ?
_exptl_absorpt_correction_T_max   ?
_exptl_absorpt_process_details    ?
 
_exptl_special_details
;
 ?
;
 
_diffrn_ambient_temperature       293(2)
_diffrn_radiation_wavelength      0.71073
_diffrn_radiation_type            MoK\a
_diffrn_radiation_source          'fine-focus sealed tube'
_diffrn_radiation_monochromator   graphite
_diffrn_measurement_device_type   'Bruker P4'
_diffrn_measurement_method        '\w scans'
_diffrn_detector_area_resol_mean  ?
_diffrn_standards_number          ?
_diffrn_standards_interval_count  ?
_diffrn_standards_interval_time   ?
_diffrn_standards_decay_%         ?
_diffrn_reflns_number             15466
_diffrn_reflns_av_R_equivalents   0.0807
_diffrn_reflns_av_sigmaI/netI     0.0586
_diffrn_reflns_limit_h_min        -11
_diffrn_reflns_limit_h_max        11
_diffrn_reflns_limit_k_min        -15
_diffrn_reflns_limit_k_max        15
_diffrn_reflns_limit_l_min        -25
_diffrn_reflns_limit_l_max        25
_diffrn_reflns_theta_min          1.75
_diffrn_reflns_theta_max          24.19
_reflns_number_total              4552
_reflns_number_gt                 4299
_reflns_threshold_expression      >2sigma(I)
 
_computing_data_collection        'Bruker XSCANS'
_computing_cell_refinement        'Bruker XSCANS'
_computing_data_reduction         'Bruker SHELXTL'
_computing_structure_solution     'SHELXS-97 (Sheldrick, 1990)'
_computing_structure_refinement   'SHELXL-97 (Sheldrick, 1997)'
_computing_molecular_graphics     'Bruker SHELXTL'
_computing_publication_material   'Bruker SHELXTL'
 
_refine_special_details
;
 Refinement of F^2^ against ALL reflections.  The weighted R-factor wR and
 goodness of fit S are based on F^2^, conventional R-factors R are based
 on F, with F set to zero for negative F^2^. The threshold expression of
 F^2^ > 2sigma(F^2^) is used only for calculating R-factors(gt) etc. and is
 not relevant to the choice of reflections for refinement.  R-factors based
 on F^2^ are statistically about twice as large as those based on F, and R-
 factors based on ALL data will be even larger.
;
 
_refine_ls_structure_factor_coef  Fsqd
_refine_ls_matrix_type            full
_refine_ls_weighting_scheme       calc
_refine_ls_weighting_details
 'calc w=1/[\s^2^(Fo^2^)+(0.0476P)^2^+0.0000P] where P=(Fo^2^+2Fc^2^)/3'
_atom_sites_solution_primary      direct
_atom_sites_solution_secondary    difmap
_atom_sites_solution_hydrogens    geom
_refine_ls_hydrogen_treatment     riding
_refine_ls_extinction_method      SHELXL
_refine_ls_extinction_coef        0.0130(8)
_refine_ls_extinction_expression
 'Fc^*^=kFc[1+0.001xFc^2^\l^3^/sin(2\q)]^-1/4^'
_refine_ls_abs_structure_details
 'Flack H D (1983), Acta Cryst. A39, 876-881'
_refine_ls_abs_structure_Flack    -0.05(3)
_refine_ls_number_reflns          4552
_refine_ls_number_parameters      329
_refine_ls_number_restraints      0
_refine_ls_R_factor_all           0.0417
_refine_ls_R_factor_gt            0.0377
_refine_ls_wR_factor_ref          0.0845
_refine_ls_wR_factor_gt           0.0829
_refine_ls_goodness_of_fit_ref    1.025
_refine_ls_restrained_S_all       1.025
_refine_ls_shift/su_max           0.001
_refine_ls_shift/su_mean          0.000
 
loop_
 _atom_site_label
 _atom_site_type_symbol
 _atom_site_fract_x
 _atom_site_fract_y
 _atom_site_fract_z
 _atom_site_U_iso_or_equiv
 _atom_site_adp_type
 _atom_site_occupancy
 _atom_site_symmetry_multiplicity
 _atom_site_calc_flag
 _atom_site_refinement_flags
 _atom_site_disorder_assembly
 _atom_site_disorder_group
Pd1 Pd 0.46319(3) 0.32878(2) 0.321830(14) 0.03007(13) Uani 1 1 d . . .
Cl1 Cl 0.22573(12) 0.32757(12) 0.35159(5) 0.0445(5) Uani 0.961(5) 1 d P . .
C1 C 0.3923(6) 0.3614(4) 0.23170(19) 0.058(2) Uani 1.19(2) 1 d P . .
H1A H 0.4701 0.3631 0.2043 0.087 Uiso 1 1 calc R . .
H1B H 0.3468 0.4235 0.2317 0.087 Uiso 1 1 calc R . .
H1C H 0.3280 0.3124 0.2186 0.087 Uiso 1 1 calc R . .
P1 P 0.55144(13) 0.29300(8) 0.41884(5) 0.0316(3) Uani 1 1 d . . .
P2 P 0.68214(12) 0.31790(9) 0.28906(5) 0.0323(3) Uani 1 1 d . . .
C2 C 0.7420(5) 0.2939(4) 0.4107(2) 0.0383(11) Uani 1 1 d . . .
H2A H 0.7765 0.3598 0.4146 0.046 Uiso 1 1 calc R . .
H2B H 0.7837 0.2549 0.4427 0.046 Uiso 1 1 calc R . .
C3 C 0.7814(5) 0.2531(4) 0.3485(2) 0.0388(11) Uani 1 1 d . . .
H3A H 0.7605 0.1843 0.3469 0.047 Uiso 1 1 calc R . .
H3B H 0.8802 0.2615 0.3415 0.047 Uiso 1 1 calc R . .
C4 C 0.5147(4) 0.1686(3) 0.44286(19) 0.0346(9) Uani 1 1 d . . .
C5 C 0.4726(6) 0.1009(3) 0.3991(2) 0.0460(12) Uani 1 1 d . . .
H5A H 0.4585 0.1207 0.3589 0.055 Uiso 1 1 calc R . .
C6 C 0.4518(7) 0.0049(4) 0.4148(3) 0.0545(14) Uani 1 1 d . . .
H6A H 0.4257 -0.0399 0.3852 0.065 Uiso 1 1 calc R . .
C7 C 0.4696(7) -0.0245(4) 0.4746(3) 0.0576(14) Uani 1 1 d . . .
H7A H 0.4558 -0.0892 0.4852 0.069 Uiso 1 1 calc R . .
C8 C 0.5077(5) 0.0417(4) 0.5186(3) 0.0513(14) Uani 1 1 d . . .
H8A H 0.5181 0.0217 0.5589 0.062 Uiso 1 1 calc R . .
C9 C 0.5305(6) 0.1373(3) 0.5032(2) 0.0407(11) Uani 1 1 d . . .
H9A H 0.5566 0.1815 0.5333 0.049 Uiso 1 1 calc R . .
C10 C 0.5173(5) 0.3672(3) 0.4857(2) 0.0364(11) Uani 1 1 d . . .
C11 C 0.3889(5) 0.4120(3) 0.4914(2) 0.0386(11) Uani 1 1 d . . .
H11A H 0.3243 0.4064 0.4600 0.046 Uiso 1 1 calc R . .
C12 C 0.3552(6) 0.4650(4) 0.5434(2) 0.0485(13) Uani 1 1 d . . .
H12A H 0.2680 0.4935 0.5472 0.058 Uiso 1 1 calc R . .
C13 C 0.4521(7) 0.4748(4) 0.5893(2) 0.0517(13) Uani 1 1 d . . .
H13A H 0.4310 0.5115 0.6237 0.062 Uiso 1 1 calc R . .
C14 C 0.5804(6) 0.4305(5) 0.5846(3) 0.0596(16) Uani 1 1 d . . .
H14A H 0.6446 0.4363 0.6162 0.072 Uiso 1 1 calc R . .
C15 C 0.6132(6) 0.3775(4) 0.5328(2) 0.0510(13) Uani 1 1 d . . .
H15A H 0.7001 0.3486 0.5295 0.061 Uiso 1 1 calc R . .
C16 C 0.7124(5) 0.2477(4) 0.2192(2) 0.0387(11) Uani 1 1 d . . .
C17 C 0.6569(6) 0.1549(4) 0.2161(2) 0.0516(14) Uani 1 1 d . . .
H17A H 0.6064 0.1304 0.2489 0.062 Uiso 1 1 calc R . .
C18 C 0.6763(7) 0.0987(5) 0.1647(3) 0.0659(18) Uani 1 1 d . . .
H18A H 0.6397 0.0362 0.1632 0.079 Uiso 1 1 calc R . .
C19 C 0.7484(8) 0.1339(6) 0.1164(3) 0.0697(19) Uani 1 1 d . . .
H19A H 0.7600 0.0958 0.0817 0.084 Uiso 1 1 calc R . .
C20 C 0.8045(8) 0.2259(6) 0.1184(3) 0.075(2) Uani 1 1 d . . .
H20A H 0.8544 0.2498 0.0853 0.090 Uiso 1 1 calc R . .
C21 C 0.7861(7) 0.2830(4) 0.1705(2) 0.0559(14) Uani 1 1 d . . .
H21A H 0.8238 0.3451 0.1721 0.067 Uiso 1 1 calc R . .
C22 C 0.7731(5) 0.4323(3) 0.2771(2) 0.0354(11) Uani 1 1 d . . .
C23 C 0.6971(6) 0.5123(4) 0.2585(2) 0.0441(12) Uani 1 1 d . . .
H23A H 0.6010 0.5079 0.2549 0.053 Uiso 1 1 calc R . .
C24 C 0.7647(7) 0.6000(4) 0.2452(3) 0.0579(16) Uani 1 1 d . . .
H24A H 0.7144 0.6536 0.2317 0.069 Uiso 1 1 calc R . .
C25 C 0.9065(8) 0.6057(5) 0.2522(3) 0.0659(18) Uani 1 1 d . . .
H25A H 0.9521 0.6639 0.2443 0.079 Uiso 1 1 calc R . .
C26 C 0.9808(7) 0.5269(5) 0.2708(3) 0.0710(18) Uani 1 1 d . . .
H26A H 1.0765 0.5317 0.2756 0.085 Uiso 1 1 calc R . .
C27 C 0.9146(6) 0.4395(4) 0.2827(3) 0.0559(15) Uani 1 1 d . . .
H27A H 0.9663 0.3856 0.2945 0.067 Uiso 1 1 calc R . .
O28 O 0.3879(10) 0.2446(5) 0.0284(3) 0.131(3) Uani 1 1 d . . .
C29 C 0.3985(13) 0.1458(10) 0.0387(6) 0.159(5) Uani 1 1 d . . .
H29A H 0.3710 0.1108 0.0022 0.191 Uiso 1 1 calc R . .
H29B H 0.4943 0.1292 0.0477 0.191 Uiso 1 1 calc R . .
C30 C 0.3147(13) 0.1185(7) 0.0869(5) 0.121(4) Uani 1 1 d . . .
H30A H 0.3693 0.1119 0.1239 0.146 Uiso 1 1 calc R . .
H30B H 0.2704 0.0567 0.0783 0.146 Uiso 1 1 calc R . .
C31 C 0.2086(11) 0.1956(9) 0.0945(4) 0.112(3) Uani 1 1 d . . .
H31A H 0.1196 0.1759 0.0777 0.135 Uiso 1 1 calc R . .
H31B H 0.1968 0.2131 0.1371 0.135 Uiso 1 1 calc R . .
C32 C 0.2700(17) 0.2752(8) 0.0593(5) 0.154(6) Uani 1 1 d . . .
H32A H 0.2025 0.2994 0.0302 0.185 Uiso 1 1 calc R . .
H32B H 0.2942 0.3279 0.0867 0.185 Uiso 1 1 calc R . .
 
loop_
 _atom_site_aniso_label
 _atom_site_aniso_U_11
 _atom_site_aniso_U_22
 _atom_site_aniso_U_33
 _atom_site_aniso_U_23
 _atom_site_aniso_U_13
 _atom_site_aniso_U_12
Pd1 0.02692(18) 0.03569(18) 0.02759(17) 0.00339(15) -0.00234(14) 0.00146(16)
Cl1 0.0303(7) 0.0598(8) 0.0433(7) -0.0014(7) 0.0005(5) 0.0002(7)
C1 0.068(3) 0.077(4) 0.029(2) 0.006(2) -0.005(2) -0.023(3)
P1 0.0290(6) 0.0387(6) 0.0271(5) 0.0035(4) -0.0027(5) 0.0012(5)
P2 0.0296(6) 0.0371(6) 0.0302(5) 0.0033(5) 0.0004(4) 0.0030(5)
C2 0.029(3) 0.045(3) 0.040(3) 0.008(2) -0.004(2) 0.001(2)
C3 0.033(3) 0.043(3) 0.040(2) 0.008(2) 0.004(2) 0.007(2)
C4 0.030(2) 0.036(2) 0.038(2) 0.003(2) -0.0005(17) 0.001(2)
C5 0.049(3) 0.048(3) 0.041(3) 0.001(2) 0.003(3) -0.007(3)
C6 0.059(4) 0.042(3) 0.063(3) -0.009(3) 0.004(3) -0.006(3)
C7 0.053(3) 0.042(3) 0.078(4) 0.012(3) 0.013(4) 0.003(3)
C8 0.048(4) 0.053(3) 0.053(3) 0.018(3) 0.012(2) 0.009(3)
C9 0.039(3) 0.046(3) 0.038(2) 0.003(2) 0.009(2) 0.006(2)
C10 0.037(3) 0.036(2) 0.036(2) 0.0042(19) -0.002(2) -0.002(2)
C11 0.036(3) 0.044(3) 0.035(2) -0.003(2) -0.008(2) -0.003(2)
C12 0.041(3) 0.054(3) 0.050(3) -0.009(3) 0.005(2) 0.002(3)
C13 0.064(4) 0.055(3) 0.036(2) -0.015(2) -0.001(3) -0.008(3)
C14 0.059(4) 0.081(4) 0.040(3) -0.013(3) -0.013(3) -0.001(3)
C15 0.042(3) 0.066(3) 0.045(3) -0.008(3) -0.011(3) 0.004(3)
C16 0.034(3) 0.045(3) 0.037(3) -0.002(2) 0.002(2) 0.011(2)
C17 0.060(3) 0.045(3) 0.050(3) -0.005(3) 0.008(3) 0.005(3)
C18 0.074(4) 0.055(3) 0.069(4) -0.017(3) -0.013(4) 0.013(3)
C19 0.074(5) 0.080(5) 0.055(4) -0.028(4) -0.004(4) 0.018(4)
C20 0.075(5) 0.106(6) 0.045(3) -0.008(4) 0.020(3) -0.001(4)
C21 0.064(4) 0.069(3) 0.034(3) 0.000(3) 0.011(3) -0.003(3)
C22 0.037(3) 0.044(3) 0.025(2) 0.002(2) 0.000(2) -0.005(2)
C23 0.043(3) 0.041(3) 0.048(3) 0.006(2) -0.005(2) -0.006(2)
C24 0.071(4) 0.048(3) 0.055(4) 0.011(3) -0.004(3) -0.008(3)
C25 0.075(5) 0.065(4) 0.057(4) 0.001(3) 0.007(3) -0.038(4)
C26 0.050(4) 0.087(4) 0.075(4) 0.015(4) -0.009(3) -0.030(4)
C27 0.040(3) 0.065(4) 0.063(4) 0.010(3) -0.008(3) -0.005(3)
O28 0.173(8) 0.113(5) 0.107(5) 0.008(4) 0.018(5) -0.039(5)
C29 0.132(10) 0.153(11) 0.193(12) 0.066(10) 0.039(10) 0.059(8)
C30 0.134(9) 0.104(7) 0.126(8) 0.051(6) 0.003(7) -0.017(7)
C31 0.097(7) 0.157(10) 0.083(6) -0.013(7) 0.005(5) -0.004(7)
C32 0.258(17) 0.095(7) 0.108(8) -0.003(6) 0.021(10) 0.076(9)
 
_geom_special_details
;
 All esds (except the esd in the dihedral angle between two l.s. planes)
 are estimated using the full covariance matrix.  The cell esds are taken
 into account individually in the estimation of esds in distances, angles
 and torsion angles; correlations between esds in cell parameters are only
 used when they are defined by crystal symmetry.  An approximate (isotropic)
 treatment of cell esds is used for estimating esds involving l.s. planes.
;
 
loop_
 _geom_bond_atom_site_label_1
 _geom_bond_atom_site_label_2
 _geom_bond_distance
 _geom_bond_site_symmetry_2
 _geom_bond_publ_flag
Pd1 C1 2.135(4) . ?
Pd1 P2 2.2308(12) . ?
Pd1 P1 2.3390(12) . ?
Pd1 Cl1 2.3762(13) . ?
P1 C10 1.815(5) . ?
P1 C4 1.826(5) . ?
P1 C2 1.842(5) . ?
P2 C22 1.821(5) . ?
P2 C16 1.833(5) . ?
P2 C3 1.843(5) . ?
C2 C3 1.522(7) . ?
C4 C5 1.397(7) . ?
C4 C9 1.398(6) . ?
C5 C6 1.380(7) . ?
C6 C7 1.381(8) . ?
C7 C8 1.375(8) . ?
C8 C9 1.377(7) . ?
C10 C11 1.387(7) . ?
C10 C15 1.390(7) . ?
C11 C12 1.390(7) . ?
C12 C13 1.377(8) . ?
C13 C14 1.380(9) . ?
C14 C15 1.384(8) . ?
C16 C21 1.369(7) . ?
C16 C17 1.387(7) . ?
C17 C18 1.377(8) . ?
C18 C19 1.354(10) . ?
C19 C20 1.378(10) . ?
C20 C21 1.395(9) . ?
C22 C27 1.370(8) . ?
C22 C23 1.384(7) . ?
C23 C24 1.403(7) . ?
C24 C25 1.376(10) . ?
C25 C26 1.361(10) . ?
C26 C27 1.386(8) . ?
O28 C29 1.384(13) . ?
O28 C32 1.386(13) . ?
C29 C30 1.381(14) . ?
C30 C31 1.482(13) . ?
C31 C32 1.464(14) . ?
 
loop_
 _geom_angle_atom_site_label_1
 _geom_angle_atom_site_label_2
 _geom_angle_atom_site_label_3
 _geom_angle
 _geom_angle_site_symmetry_1
 _geom_angle_site_symmetry_3
 _geom_angle_publ_flag
C1 Pd1 P2 91.10(15) . . ?
C1 Pd1 P1 177.35(15) . . ?
P2 Pd1 P1 86.26(4) . . ?
C1 Pd1 Cl1 86.97(15) . . ?
P2 Pd1 Cl1 174.86(5) . . ?
P1 Pd1 Cl1 95.68(4) . . ?
C10 P1 C4 105.1(2) . . ?
C10 P1 C2 104.7(2) . . ?
C4 P1 C2 103.1(2) . . ?
C10 P1 Pd1 123.21(16) . . ?
C4 P1 Pd1 112.86(14) . . ?
C2 P1 Pd1 105.82(16) . . ?
C22 P2 C16 105.1(2) . . ?
C22 P2 C3 105.7(2) . . ?
C16 P2 C3 104.5(2) . . ?
C22 P2 Pd1 116.25(16) . . ?
C16 P2 Pd1 117.00(17) . . ?
C3 P2 Pd1 107.17(16) . . ?
C3 C2 P1 109.4(3) . . ?
C2 C3 P2 108.9(3) . . ?
C5 C4 C9 118.3(4) . . ?
C5 C4 P1 119.0(3) . . ?
C9 C4 P1 122.7(4) . . ?
C6 C5 C4 120.6(5) . . ?
C5 C6 C7 120.0(5) . . ?
C8 C7 C6 120.1(5) . . ?
C7 C8 C9 120.4(5) . . ?
C8 C9 C4 120.6(5) . . ?
C11 C10 C15 118.6(5) . . ?
C11 C10 P1 118.9(4) . . ?
C15 C10 P1 122.4(4) . . ?
C10 C11 C12 121.0(5) . . ?
C13 C12 C11 119.4(5) . . ?
C12 C13 C14 120.5(5) . . ?
C13 C14 C15 119.8(5) . . ?
C14 C15 C10 120.6(5) . . ?
C21 C16 C17 119.2(5) . . ?
C21 C16 P2 123.0(4) . . ?
C17 C16 P2 117.7(4) . . ?
C18 C17 C16 120.4(6) . . ?
C19 C18 C17 120.4(6) . . ?
C18 C19 C20 120.3(6) . . ?
C19 C20 C21 119.6(6) . . ?
C16 C21 C20 120.1(6) . . ?
C27 C22 C23 119.6(5) . . ?
C27 C22 P2 121.9(4) . . ?
C23 C22 P2 118.5(4) . . ?
C22 C23 C24 120.1(5) . . ?
C25 C24 C23 119.0(6) . . ?
C26 C25 C24 120.6(6) . . ?
C25 C26 C27 120.5(6) . . ?
C22 C27 C26 120.2(6) . . ?
C29 O28 C32 106.2(9) . . ?
C30 C29 O28 110.4(10) . . ?
C29 C30 C31 107.1(8) . . ?
C32 C31 C30 101.5(8) . . ?
O28 C32 C31 111.1(8) . . ?
 
loop_
 _geom_torsion_atom_site_label_1
 _geom_torsion_atom_site_label_2
 _geom_torsion_atom_site_label_3
 _geom_torsion_atom_site_label_4
 _geom_torsion
 _geom_torsion_site_symmetry_1
 _geom_torsion_site_symmetry_2
 _geom_torsion_site_symmetry_3
 _geom_torsion_site_symmetry_4
 _geom_torsion_publ_flag
C1 Pd1 P1 C10 124(3) . . . . ?
P2 Pd1 P1 C10 127.1(2) . . . . ?
Cl1 Pd1 P1 C10 -57.7(2) . . . . ?
C1 Pd1 P1 C4 -108(3) . . . . ?
P2 Pd1 P1 C4 -104.99(16) . . . . ?
Cl1 Pd1 P1 C4 70.23(16) . . . . ?
C1 Pd1 P1 C2 4(3) . . . . ?
P2 Pd1 P1 C2 7.07(18) . . . . ?
Cl1 Pd1 P1 C2 -177.71(18) . . . . ?
C1 Pd1 P2 C22 79.1(2) . . . . ?
P1 Pd1 P2 C22 -100.74(17) . . . . ?
Cl1 Pd1 P2 C22 147.0(5) . . . . ?
C1 Pd1 P2 C16 -46.1(2) . . . . ?
P1 Pd1 P2 C16 134.06(18) . . . . ?
Cl1 Pd1 P2 C16 21.8(6) . . . . ?
C1 Pd1 P2 C3 -163.0(2) . . . . ?
P1 Pd1 P2 C3 17.16(18) . . . . ?
Cl1 Pd1 P2 C3 -95.1(5) . . . . ?
C10 P1 C2 C3 -167.5(3) . . . . ?
C4 P1 C2 C3 82.8(4) . . . . ?
Pd1 P1 C2 C3 -36.0(4) . . . . ?
P1 C2 C3 P2 51.8(4) . . . . ?
C22 P2 C3 C2 80.0(4) . . . . ?
C16 P2 C3 C2 -169.4(4) . . . . ?
Pd1 P2 C3 C2 -44.6(4) . . . . ?
C10 P1 C4 C5 152.6(4) . . . . ?
C2 P1 C4 C5 -97.9(4) . . . . ?
Pd1 P1 C4 C5 15.8(4) . . . . ?
C10 P1 C4 C9 -29.1(4) . . . . ?
C2 P1 C4 C9 80.3(4) . . . . ?
Pd1 P1 C4 C9 -166.0(3) . . . . ?
C9 C4 C5 C6 -2.1(8) . . . . ?
P1 C4 C5 C6 176.2(4) . . . . ?
C4 C5 C6 C7 1.4(9) . . . . ?
C5 C6 C7 C8 0.2(10) . . . . ?
C6 C7 C8 C9 -1.0(9) . . . . ?
C7 C8 C9 C4 0.3(8) . . . . ?
C5 C4 C9 C8 1.3(7) . . . . ?
P1 C4 C9 C8 -177.0(4) . . . . ?
C4 P1 C10 C11 -96.3(4) . . . . ?
C2 P1 C10 C11 155.4(4) . . . . ?
Pd1 P1 C10 C11 34.9(4) . . . . ?
C4 P1 C10 C15 81.0(5) . . . . ?
C2 P1 C10 C15 -27.3(5) . . . . ?
Pd1 P1 C10 C15 -147.9(4) . . . . ?
C15 C10 C11 C12 -1.0(7) . . . . ?
P1 C10 C11 C12 176.4(4) . . . . ?
C10 C11 C12 C13 1.4(8) . . . . ?
C11 C12 C13 C14 -1.6(9) . . . . ?
C12 C13 C14 C15 1.4(9) . . . . ?
C13 C14 C15 C10 -0.9(9) . . . . ?
C11 C10 C15 C14 0.7(8) . . . . ?
P1 C10 C15 C14 -176.5(5) . . . . ?
C22 P2 C16 C21 -1.8(5) . . . . ?
C3 P2 C16 C21 -112.9(5) . . . . ?
Pd1 P2 C16 C21 128.8(4) . . . . ?
C22 P2 C16 C17 178.5(4) . . . . ?
C3 P2 C16 C17 67.4(5) . . . . ?
Pd1 P2 C16 C17 -50.9(4) . . . . ?
C21 C16 C17 C18 0.3(8) . . . . ?
P2 C16 C17 C18 -180.0(4) . . . . ?
C16 C17 C18 C19 -0.8(10) . . . . ?
C17 C18 C19 C20 0.8(11) . . . . ?
C18 C19 C20 C21 -0.4(11) . . . . ?
C17 C16 C21 C20 0.1(9) . . . . ?
P2 C16 C21 C20 -179.6(5) . . . . ?
C19 C20 C21 C16 -0.1(10) . . . . ?
C16 P2 C22 C27 -77.2(5) . . . . ?
C3 P2 C22 C27 33.1(5) . . . . ?
Pd1 P2 C22 C27 151.8(4) . . . . ?
C16 P2 C22 C23 99.1(4) . . . . ?
C3 P2 C22 C23 -150.6(4) . . . . ?
Pd1 P2 C22 C23 -31.9(4) . . . . ?
C27 C22 C23 C24 0.4(8) . . . . ?
P2 C22 C23 C24 -176.0(4) . . . . ?
C22 C23 C24 C25 -1.5(9) . . . . ?
C23 C24 C25 C26 1.2(10) . . . . ?
C24 C25 C26 C27 0.2(10) . . . . ?
C23 C22 C27 C26 1.1(9) . . . . ?
P2 C22 C27 C26 177.4(5) . . . . ?
C25 C26 C27 C22 -1.4(10) . . . . ?
C32 O28 C29 C30 -15.7(15) . . . . ?
O28 C29 C30 C31 20.5(15) . . . . ?
C29 C30 C31 C32 -16.2(13) . . . . ?
C29 O28 C32 C31 4.6(14) . . . . ?
C30 C31 C32 O28 7.1(13) . . . . ?
 
_diffrn_measured_fraction_theta_max    0.985
_diffrn_reflns_theta_full              24.19
_diffrn_measured_fraction_theta_full   0.985
_refine_diff_density_max    0.319
_refine_diff_density_min   -0.527
_refine_diff_density_rms    0.075
#===END
